# Supplementary material for: Comparative study of the antiproliferative activity of heterometallic carbene gold(i)–platinum(ii) and gold(i)–palladium(ii) complexes in cancer cell lines
Source: Royal Society of Chemistry journal article supplement (doi:10.1039/d4sc04585h), 2024-01-01
Supplement: d4sc04585h1.pdf [file d4sc04585h1.pdf]

Supporting Information for

## Comparative Study of the Antiproliferative Activity of Heterometallic Carbene Gold(I)-Platinum(II) and Gold(I)-Palladium(II) Complexes in Cancer Cell Lines

Martin C. Dietl,<sup>a</sup> Melina Maag,<sup>a</sup> Sophia Ber,<sup>a</sup> Frank Rominger,<sup>a</sup> Matthias Rudolph,<sup>a</sup> Isabella Caligiuri,<sup>b</sup> Pacome K. Andele,<sup>b,c</sup> Ibraheem A. I. Mkhaliid,<sup>d</sup> Flavio Rizzolio,<sup>b,c</sup> Pablo A. Nogara,<sup>f</sup> Laura Orian,<sup>g</sup> Thomas Scattolin,<sup>\*g</sup> and A. Stephen K. Hashmi<sup>\*a,d</sup>

<sup>a</sup> Organisch-Chemisches Institut, Heidelberg University, Im Neuenheimer Feld 270, 69120 Heidelberg, Germany. E-mail: [hashmi@hashmi.de](mailto:hashmi@hashmi.de)

<sup>b</sup> Pathology Unit, Centro di Riferimento Oncologico di Aviano (C.R.O.) IRCCS  
via Franco Gallini 2, 33081, Aviano, Italy.

<sup>c</sup> Dipartimento di Scienze Molecolari e Nanosistemi, Università Ca' Foscari, Campus Scientifico Via Torino 155, 30174 Venezia-Mestre (Italy).

<sup>d</sup> Chemistry Department, Faculty of Science, King Abdulaziz University, Jeddah 21589, Saudi Arabia

<sup>e</sup> Dipartimento di Scienze Molecolari e Nanosistemi, Università Ca' Foscari, Campus Scientifico Via Torino 155, 30174 Venezia-Mestre (Italy).

<sup>f</sup> Instituto Federal de Educação, Ciência e Tecnologia Sul-rio-grandense (IFSul), Av. Leonel de Moura Brizola, 2501, 96418-400, Bagé, RS, Brazil.

<sup>g</sup> Dipartimento di Scienze Chimiche, Università degli Studi di Padova, via Marzolo 1, 35131 Padova (Italy). E-mail: [thomas.scattolin@unipd.it](mailto:thomas.scattolin@unipd.it)

### Table of Contents

|   |                                                |    |
|---|------------------------------------------------|----|
| 1 | General Remarks .....                          | 5  |
| 2 | Synthesis of Compounds .....                   | 6  |
| 3 | NMR Spectra .....                              | 54 |
| 4 | DNA Docking .....                              | 78 |
| 5 | Cell viability assay and cellular uptake ..... | 84 |
| 6 | Stability of complex 3h in solution.....       | 85 |
| 7 | Single Crystal Structure of 3c.....            | 86 |
| 8 | References .....                               | 87 |

## 1 General Remarks

All reagents and solvents were obtained from Acros, ABCR, Alfa Aesar, Sigma-Aldrich or VWR and were used without further purification unless otherwise noted. Deuterated solvents were purchased from Euriso-Top. Anhydrous solvents were dried by an MB SPS-800 with the aid of drying columns. Preparation of air- and moisture-sensitive materials was carried out in flame-dried flasks under an argon atmosphere employing standard Schlenk techniques. Thin layer chromatography (TLC) was performed using Polygram® precoated plastic sheets SIL G/UV254 (SiO<sub>2</sub>, 0.20 mm thickness) from Macherey-Nagel. Column chromatography was performed using silica gel (40.0-63.0 nm particle size) from Macherey-Nagel. All cell lines were purchased from Sigma-Aldrich. NMR spectra were recorded on Bruker Avance 500, Bruker Avance 300 and Bruker ARX-250 spectrometers. Chemical shifts (in ppm) were referenced to residual solvent protons. Signal multiplicity was determined as s (singlet), d (doublet), t (triplet), q (quartet), quin (quintet), sex (sextet), sept (septet), m (multiplet), bs (broad signal), p (pseudo multiplicity). <sup>13</sup>C assignment was achieved via DEPT135 spectra. Mass spectra were recorded on a Vacuum Generators ZAB-2F, Finnigan MAT TSQ 700 or JEOL JMS-700 spectrometer. GC-MS spectra were recorded on a HP Agilent 5890 Series II Plus with a HP 5972 mass analyser. FT-IR spectra (in cm<sup>-1</sup>) were recorded on a Bruker Vector 22 FT-IR. Crystal structure analyses were recorded on Bruker SmartCCD or Bruker APEX diffractometers.

## 2 Synthesis of Compounds

### 2.1 General Procedures

#### 2.1.1 General Procedure for the Synthesis of Formamides (GP1)

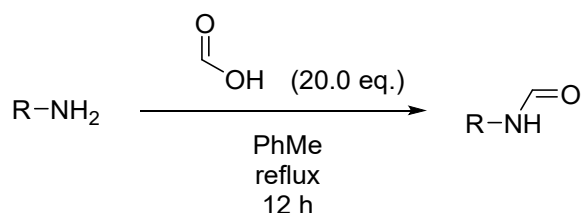

According to literature<sup>1</sup>, in a round bottom flask, the amine (1.00 eq.) was dissolved in reagent grade toluene. Afterwards formic acid (20.0 eq.) was added to the solution, which was then refluxed with a Dean-Stark-Apparatus overnight. Removal of all volatiles *in vacuo* yielded the title compound which was used without further purification.

#### 2.1.2 General procedure for the Synthesis of Isonitriles (GP2)

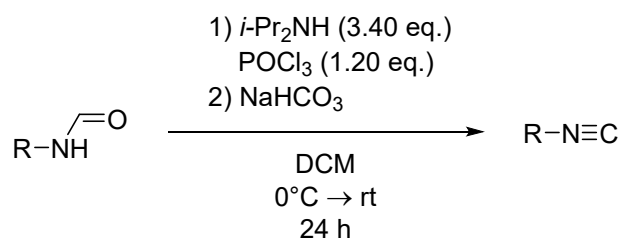

According to literature<sup>1</sup>, in a round bottom flask, the formamide (1.00 eq.) and diisopropylamine (3.40 eq.) were dissolved in reagent grade DCM. The solution was cooled to 0 °C, then phosphoryl chloride (1.20 eq.) was added dropwise. The mixture was stirred for 3 hours for 0°C, then it was stirred over night at room temperature. Afterwards an aqueous solution of sodium hydrogen carbonate was added, and the resulting biphasic solution was stirred additional 24 hours at room temperature. The organic layer was separated, the aqueous layer was extracted with DCM. The combined organic layers were dried over sodium sulphate. Removal of all volatiles yielded title compound.

### 2.1.3 General Procedure for the Synthesis of Isonitrile-Gold(I)-Complexes (GP3)

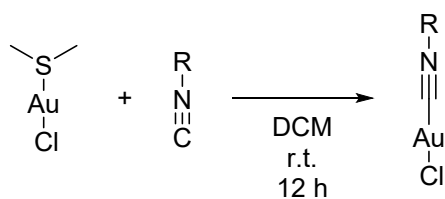

R = aromatic, aliphatic

According to literature<sup>1</sup>, in a round bottom flask, chloro(dimethyl sulfide)gold(I) (1.00 eq.) was dissolved in reagent grade DCM. Afterwards the corresponding isonitrile (1.00 eq.) was added to the solution. The reaction mixture was stirred at room temperature upon completion. Purification of the crude product was achieved by recrystallization from DCM/*n*-pentane.

### 2.1.4 General Procedure for the Synthesis of Isonitrile-Platinum(II)-Complexes (GP4)

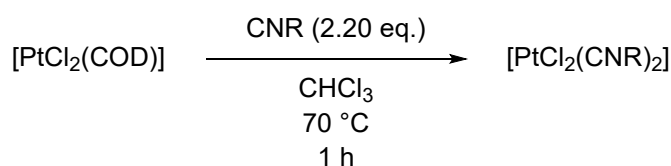

Based on a modification of a literature procedure<sup>2</sup>, in a round bottom flask,  $[\text{PtCl}_2(\text{COD})]$  (1.00 eq.) and the corresponding isonitrile (2.20 eq.) were dissolved in reagent grade chloroform. The reaction mixture was refluxed for one hour. After cooling to room temperature, the reaction volume was narrowed down to half of the original volume. Afterwards the reaction product was crystallized by the addition of *n*-pentane and dried to furnish the desired product.

### 2.1.5 General Procedure for the Synthesis of acyclic diaminocarbene gold(I)-complexes (GP5)

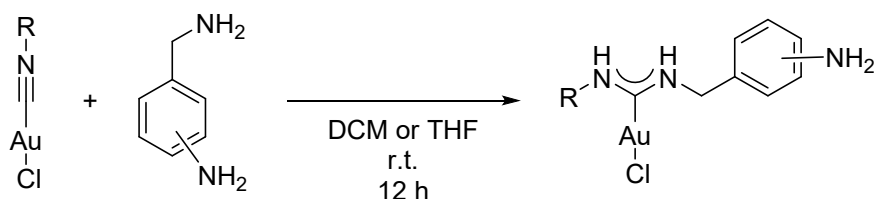

R = aromatic, aliphatic

According to literature<sup>1</sup>, the isonitrile gold (I) complex (1.00 eq.) and the corresponding aminobenzylamine (1.00 eq.) were dissolved in reagent grade DCM and stirred at room temperature for 12 hours. Purification of the crude product was achieved by flash column chromatography (DCM, DCM:MeOH = 99:1).

### 2.1.6 General Procedure for the Synthesis of heterodinuclear bis(acyclic diaminocarbene) Gold(I)- and Platinum(II)- Complexes (GP6)

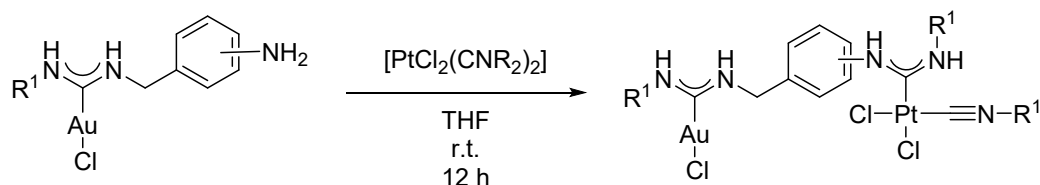

R = aromatic, aliphatic  
R' = aromatic

The acyclic diaminocarbene gold(I) complex (1.00 eq.) and the isonitrile platinum(II) complex (1.00 eq.) were dissolved in reagent grade THF and stirred at 40 °C for 12 hours. Afterwards the product was crystallized by the addition of *n*-pentane to the crude reaction mixture.

### 2.1.7 General Procedure for the One-Pot Synthesis of heterodinuclear Gold(I)- and Palladium(II)-Complexes (GP7)

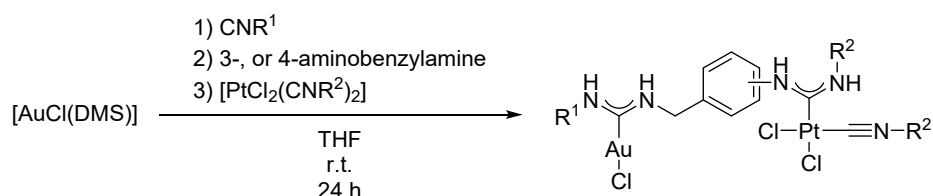

In a round bottom flask, chloro(dimethyl sulfide)gold(I) (1.00 eq.) and the corresponding isonitrile (1.00 eq.) were dissolved in reagent grade THF. The reaction mixture was stirred for 12 hours at room temperature. Afterwards the corresponding isonitrile palladium(II) complex (1.00 eq.) was added. After stirring the solution for another 12 hours at 40 °C the reaction was filtered. Addition of *n*-pentane to the filtrate furnished the desired product by crystallization.

## 2.1.8 General Procedure for the Synthesis of Isonitrile-Palladium(II)-Complexes (GP8)

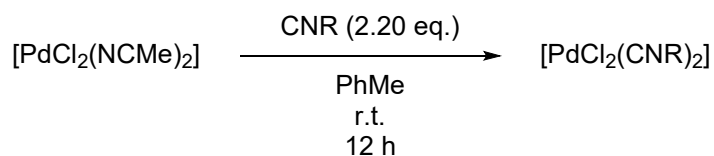

According to literature<sup>1</sup>, in a round bottom flask, bis(acetonitrile)palladium chloride (1.00 eq.) was dissolved in reagent grade toluene. Afterwards the corresponding isonitrile (2.00 eq.) was added to the solution. The reaction mixture was stirred at room temperature for 12 hours. The solvent was removed *in vacuo* and the residue was washed three times with *n*-pentane to obtain title compound.

## 2.1.9 General Procedure for the Synthesis of heterodinuclear bis(acyclic diaminocarbene) Gold(I)- and Palladium(II)- Complexes (GP9)

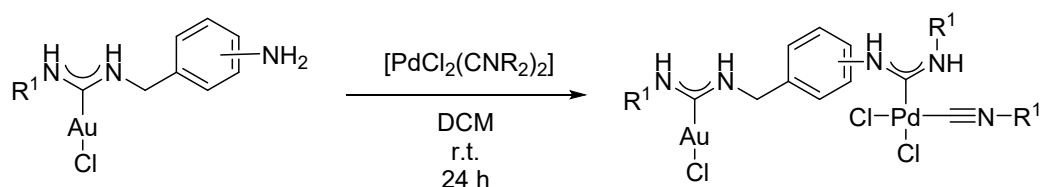

R = aromatic, aliphatic  
R' = aromatic

According to literature<sup>1</sup>, the acyclic diaminocarbene gold(I) complex (1.00 eq.) and the isonitrile palladium(II) complex (1.00 eq.) were dissolved in reagent grade DCM and stirred at room temperature upon completion. Purification of the crude product was achieved recrystallization from DCM/Et<sub>2</sub>O.

## 2.2 Synthetic Procedures

### 2.2.1 Synthesis of *N*-(2,6-diisopropylphenyl)formamide

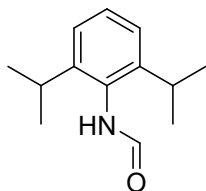

According to **GPI**, the reaction was carried out with 2,6-diisopropylaniline (5.00 g, 5.32 mL, 28.2 mmol, 1.00 eq.) and formic acid (26.0 g, 21.3 mL, 740 mmol, 20. eq.) in toluene (185 mL) to obtain title compound as a colorless solid (5.51 g, 24.4 mmol, 86 %).

Analytical data is in accordance with literature.<sup>1</sup>

**<sup>1</sup>H NMR** (300 MHz, CDCl<sub>3</sub>, 295 K)  $\delta$  [ppm] = 8.48 (s, 1H, Rotamers A and B, -NH(CHO)), 8.05 (s, 1H, Rotamer B, -CHO), 8.02 (d,  $J$  = 5.1 Hz, 1H, Rotamer A, -CHO), 7.39 – 7.27 (m, 1H, Rotamers A and B, C<sub>Ar</sub>H), 7.21 (d,  $J$  = 3.1 Hz, 2H, Rotamer A, 2xC<sub>Ar</sub>H), 7.19 (d, 3.1 Hz, 2H, Rotamer B, 2xC<sub>Ar</sub>H), 3.22 (hept,  $J$  = 6.9 Hz, 2H, Rotamer A, 2xCH), 3.11 (hept,  $J$  = 6.9 Hz, 2H, Rotamer B, 2xCH), 1.22 (d,  $J$  = 6.9 Hz, 12H, Rotamers A and B, 4x-CH<sub>3</sub>).

### 2.2.2 Synthesis of *N*-mesitylformamide

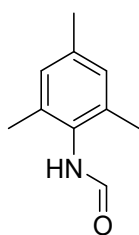

According to **GPI**, the reaction was carried out with 2,4,6-trimethylaniline (5.00 g, 5.19 mL, 37.0 mmol, 1.00 eq.) and formic acid (34.0 g, 27.9 mL, 740 mmol, 20. eq.) in toluene (185 mL) to obtain title compound as a colorless solid (5.34 g, 32.5 mmol, 88 %).

Analytical data is in accordance with literature.<sup>1</sup>

**<sup>1</sup>H NMR** (300 MHz, CDCl<sub>3</sub>, 295 K)  $\delta$  [ppm] = 8.41 (s, 1H, Rotamers A and B, -NH(CHO)), 8.09 – 8.02 (m, 1H, Rotamers A and B, -CHO), 8.04 (s, 1H, Rotamer A, C<sub>Ar</sub>H), 6.94 (s, 2H, Rotamer A, 2xC<sub>Ar</sub>H), 6.92 (s, 2H, Rotamer B, 2xC<sub>Ar</sub>H), 2.29 (s, 3H, Rotamer A, -CH<sub>3</sub>), 2.27 (s, 3H, Rotamer B, -CH<sub>3</sub>), 2.26 (s, 6H, Rotamer A, 2x-CH<sub>3</sub>), 2.22 (s, 6H, Rotamer B, 2x-CH<sub>3</sub>).

### 2.2.3 Synthesis of (2,6-Diisopropylphenyl)isonitrile

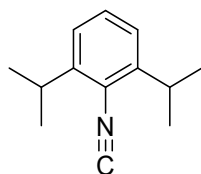

According to **GP2**, the reaction was carried out with *N*-(2,6-diisopropylphenyl)formamide (5.50 g, 26.8 mmol, 1.00 eq.), diisopropylamine (9.22 g, 12.9 mL, 91.9 mmol, 3.40 eq.) and phosphoryl chloride (4.93 g, 2.93 mL, 32.2 mmol, 1.20 eq.) to obtain title compound as a yellow liquid (4.90 g, 26.0 mmol, 97 %).

Analytical data is in accordance with literature.<sup>1</sup>

<sup>1</sup>H NMR (300 MHz, CDCl<sub>3</sub>, 295 K) δ [ppm] = 7.33 (t, *J* = 7.2 Hz, 1H, C<sub>Ar</sub>H), 7.17 (d, *J* = 7.8 Hz, 2H, 2x C<sub>Ar</sub>H), 3.39 (hept, *J* = 6.9 Hz, 2H, 2x CH), 1.29 (d, *J* = 6.9 Hz, 12H, 4x-CH<sub>3</sub>).

### 2.2.4 Synthesis of Mesitylisonitrile

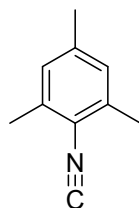

According to **GP2**, the reaction was carried out with *N*-mesitylformamide (5.00 g, 30.6 mmol, 1.00 eq.), diisopropylamine (9.30 g, 13.0 mL, 91.9 mmol, 3.40 eq.) and phosphoryl chloride (5.64 g, 3.44 mL, 36.8 mmol, 1.20 eq.) to obtain title compound as a yellow liquid (3.92 g, 27.0 mmol, 88 %).

Analytical data is in accordance with literature.<sup>1</sup>

<sup>1</sup>H NMR (300 MHz, CDCl<sub>3</sub>, 295 K) δ [ppm] = 6.92 (s, 2H, 2x C<sub>Ar</sub>H), 2.40 (s, 6H, 2x-CH<sub>3</sub>), 2.31 (s, 3H, -CH<sub>3</sub>).



## 2.2.5 Synthesis of *tert*-Butylisonitrile gold(I) chloride

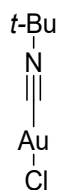

According to **GP3** the reaction was carried out with chloro(dimethyl sulfide)gold(I) (150 mg, 509  $\mu\text{mol}$ , 1.00 eq.) and *tert*-butyl isocyanide (42.3 mg, 509  $\mu\text{mol}$ , 1.00 eq.) to obtain title compound as a colorless solid (158 mg, 501  $\mu\text{mol}$ , 98 % yield).

Analytical data is in accordance with literature.<sup>1</sup>

<sup>1</sup>H NMR (300 MHz, CD<sub>2</sub>Cl<sub>2</sub>, 295 K):  $\delta$  [ppm] = 1.56 (t, J = 2.21 Hz, 9H, 3x-CH<sub>3</sub>).

## 2.2.6 Synthesis of (2,6-Diisopropylphenyl)isonitrile gold(I) chloride

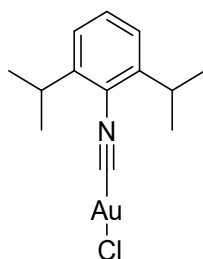

According to **GP3** the reaction was carried out with chloro(dimethyl sulfide)gold(I) (150 mg, 509  $\mu\text{mol}$ , 1.00 eq.) and 2,6-diisopropylphenyl isocyanide (95.4 mg, 509  $\mu\text{mol}$ , 1.00 eq.) to obtain title compound as a colorless solid (203 mg, 484  $\mu\text{mol}$ , 95 % yield).

Analytical data is in accordance with literature.<sup>1</sup>

<sup>1</sup>H NMR (300 MHz, CD<sub>2</sub>Cl<sub>2</sub>, 295 K):  $\delta$  [ppm] = 7.50 (t, J=7.86 Hz, 1H, C<sub>Ar</sub>H), 7.27 (d, J=7.82 Hz, 2H, 2xC<sub>Ar</sub>H), 3.25 (sept., J= 6.78 Hz, 2H, 2xCH), 1.29 (d, J=6.85 Hz, 12H, 4x-CH<sub>3</sub>).

## 2.2.7 Synthesis of Mesitylisonitrile gold(I) chloride

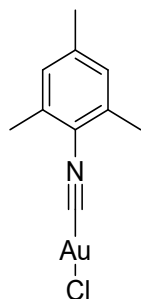

According to **GP3** the reaction was carried out with chloro(dimethyl sulfide)gold(I) (150 mg, 509  $\mu\text{mol}$ , 1.00 eq.) and mesityl isocyanide (81.1 mg, 509  $\mu\text{mol}$ , 1.00 eq.) to obtain title compound as a colorless solid (190 mg, 503  $\mu\text{mol}$ , 99 % yield).

Analytical data is in accordance with literature.<sup>1</sup>

**$^1\text{H}$  NMR** (300 MHz,  $\text{CD}_2\text{Cl}_2$ , 295 K):  $\delta$  [ppm] = 7.00 (s, 2H,  $2\times\text{C}_{\text{Ar}}\text{H}$ ), 2.39 (s, 6H,  $2\times\text{-CH}_3$ ), 2.33 (s, 3H,  $-\text{CH}_3$ ).

## 2.2.8 Synthesis of $\text{PtCl}_2(\text{COD})$

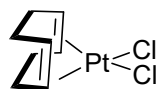

The reaction was carried out according to a literature-known procedure<sup>3</sup>. In a round bottom flask, potassium tetrachloroplatinate (1.00 g, 2.41 mmol, 1.00 eq.) and 1,5-cyclooctadiene (1.04 g, 9.64 mmol, 4.00 eq.) was dissolved in a mixture of equal amounts of water and acetic acid (25 mL each). The reaction mixture was refluxed over night and was subsequently cooled down to room temperature. The formed precipitate was collected by filtration and washed with water and diethyl ether. The solid was dried in vacuo to furnish the reaction product as colorless crystals (819 mg, 2.19 mmol, 91 %).

**$^1\text{H}$  NMR** (400 MHz,  $\text{CD}_2\text{Cl}_2$ , 295 K)  $\delta$  = 5.89 – 5.43 (m, 4H,  $4\times\text{CH}$ ), 2.93 – 2.50 (m, 4H,  $2\times\text{CH}_2$ ), 2.38 – 2.13 (m, 4H,  $2\times\text{CH}_2$ );

**$^{13}\text{C}$  NMR** (101 MHz,  $\text{CD}_2\text{Cl}_2$ , 295 K)  $\delta$  100.94 (d, t,  $J_{\text{Pt-C}} = 76.3$  Hz,  $4\times\text{CH}$ ), 31.28 (t,  $4\times\text{-CH}_2$ -);

**$^{195}\text{Pt}$  NMR** (86 MHz,  $\text{CD}_2\text{Cl}_2$ , 295 K)  $\delta$  = -3329.76;

**IR** (ATR)  $\tilde{\nu}$  [ $\text{cm}^{-1}$ ] = 3023 (w), 3009 (m), 2963 (w), 2943 (w), 2895 (w), 2838 (w), 2037 (w), 1916 (w), 1476 (w), 1451 (s), 1425 (m), 1340 (m), 1311 (s), 1227 (w), 1180 (w), 1089 (m), 1029 (s), 1010 (w), 911 (w), 872 (m), 833 (m), 811 (s), 781 (m), 695 (m);

**HR-MS** (EI (+)):  $C_8H_{12}^{35}Cl_2^{194}Pt [M]^+$  calcd. 371.99427, found 372.00362;  $C_8H_{12}^{35}Cl^{37}Cl^{194}Pt [M]^+$  calcd. 373.99132, found 374.00128;  $C_8H_{12}^{37}Cl_2^{194}Pt [M]^+$  calcd. 375.98837, found 376.00275;  $C_8H_{12}^{35}Cl_2^{195}Pt [M]^+$  calcd. 372.99638, found 372.00210;  $C_8H_{12}^{35}Cl^{37}Cl^{195}Pt [M]^+$  calcd. 374.99343, found 375.00101;  $C_8H_{12}^{37}Cl_2^{195}Pt [M]^+$  calcd. 376.99048, found 377.00673;  $C_8H_{12}^{35}Cl_2^{196}Pt [M]^+$  calcd. 373.99654, found 374.00128;  $C_8H_{12}^{35}Cl^{37}Cl^{196}Pt [M]^+$  calcd. 375.99359, found 376.00275;  $C_8H_{12}^{37}Cl_2^{196}Pt [M]^+$  calcd. 377.99064, found 377.99181;  $C_8H_{12}^{35}Cl_2^{198}Pt [M]^+$  calcd. 375.99948, found 376.00275;  $C_8H_{12}^{35}Cl^{37}Cl^{198}Pt [M]^+$  calcd. 377.99653, found 377.99181;

**EA** calcd for  $C_8H_{12}Cl_2Pt$ : C: 25.68 %, H: 3.23 %, found. C: 24.92 %, H: 3.24 %.

## 2.2.9 Synthesis of Bis(tert-butylisocyanide)platinum(II) chloride (1a)

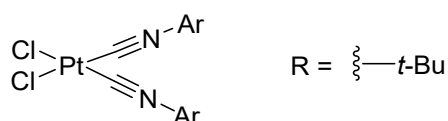

According to **GP4** the reaction was carried out with  $PtCl_2(\text{cod})$  (250 mg, 668  $\mu\text{mol}$ , 1.00 eq.) and *tert*-butyl isocyanide (213 mg, 1.47 mmol, 2.20 eq.). Title compound was obtained as a colorless solid (323 mg, 580  $\mu\text{mol}$ , 87 %).

**$^1H$  NMR** (400 MHz,  $CD_2Cl_2$ , 295 K)  $\delta$  [ppm] = 1.56 (s, 18H, 6x- $\underline{CH}_3$ ).

**$^{13}C$  NMR** (126 MHz,  $CD_2Cl_2$ , 295 K)  $\delta$  [ppm] = 59.95 (t,  $J = 4.5$  Hz, 2C, 2x $\underline{C}_{\text{isonitrile}}$ ), 45.82 (s, 2C, 2x- $\underline{C}(\text{CH}_3)_2$ ), 29.74 (q, 6C, 6x- $\underline{CH}_3$ ).

**$^{195}Pt$  NMR** (86 MHz,  $CD_2Cl_2$ , 295 K)  $\delta$  [ppm] = -3825.77 (p,  $J = 105.9$  Hz).

**IR** (ATR)  $\tilde{\nu}$  [ $\text{cm}^{-1}$ ] = 2981 (w), 2936 (w), 2875 (w), 2256 (m), 2228 (s), 2042 (w), 1464 (w), 1400 (m), 1372 (m), 1236 (m), 1191 (s), 1046 (w), 934 (w), 859 (w), 747 (w);

**HR-MS** (ESI (+)):  $C_{10}H_{18}^{35}Cl_2^{194}PtNa [M+Na]^+$  calcd. 453.0371, found 453.0373;  $C_{10}H_{18}^{35}Cl^{37}Cl^{194}PtNa [M+Na]^+$  calcd. 455.0342, found 455.0395;  $C_{10}H_{18}^{37}Cl_2^{194}PtNa [M+Na]^+$  calcd. 457.0312, found 457.0367;  $C_{10}H_{18}^{35}Cl_2^{195}PtNa [M+Na]^+$  calcd. 454.0392, found 454.0394;  $C_{10}H_{18}^{35}Cl^{37}Cl^{195}PtNa [M+Na]^+$  calcd. 456.0363, found 456.0365;  $C_{10}H_{18}^{35}Cl_2^{196}PtNa [M+Na]^+$  calcd. 455.0394, found 455.0396;  $C_{10}H_{18}^{35}Cl^{37}Cl^{196}PtNa [M+Na]^+$  calcd. 457.0365, found 457.0367;  $C_{10}H_{18}^{35}Cl_2^{198}PtNa [M+Na]^+$  calcd. 457.0423, found 457.0367;

EA calcd. for C<sub>10</sub>H<sub>18</sub>Cl<sub>2</sub>N<sub>2</sub>Pt: C: 27.79, H: 4.20, N: 6.48; found C: 28.06, H: 4.37, N: 6.50.

### 2.2.10 Synthesis of Bis((2,6-diisopropylphenyl)isonitrile)platinum(II) chloride (1b)

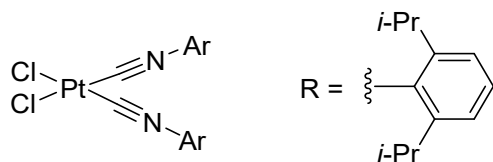

According to **GP4** the reaction was carried out with PtCl<sub>2</sub>(cod) (250 mg, 668 μmol, 1.00 eq.) and 2,6-diisopropylphenyl isocyanide (275 mg, 1.47 mmol, 2.20 eq.). Title compound was obtained as a colorless solid (364 mg, 568 μmol, 85 %).

<sup>1</sup>H NMR (400 MHz, CD<sub>2</sub>Cl<sub>2</sub>, 295 K) δ [ppm] = 7.50 – 7.44 (m, 2H, 2xC<sub>Ar</sub>H), 7.27 (d, *J* = 7.9 Hz, 4H, 4xC<sub>Ar</sub>H), 3.34 (hept, *J* = 6.8 Hz, 4H, 4xCH), 1.30 (d, *J* = 6.9 Hz, 24H, 8x-CH<sub>3</sub>);

<sup>13</sup>C NMR (101 MHz, CD<sub>2</sub>Cl<sub>2</sub>, 295 K) δ [ppm] = 146.70 (s, 2C, 2xC<sub>Ar</sub>), 131.72 (s, 4C, 4xC<sub>Ar</sub>), 124.33 (d, 6C, 6xC<sub>Ar</sub>H), 30.39 (d, 4C, 4xCH), 22.84 (q, 8C, 8x-CH<sub>3</sub>). C<sub>isonitrile</sub> not visible;

<sup>195</sup>Pt NMR (86 MHz, CD<sub>2</sub>Cl<sub>2</sub>, 295 K) δ [ppm] = -3754.80 (p, *J* = 121.6 Hz);

IR (ATR)  $\tilde{\nu}$  [cm<sup>-1</sup>] = 2967 (m), 2929 (w), 2870 (w), 2223 (m), 2193 (s), 1588 (w), 1466 (m), 1385 (m), 1365 (w), 1334 (m), 1261 (w), 1185 (w), 1109 (w), 1062 (w), 1044 (w), 939 (w), 797 (s), 747 (s);

HR-MS (EI (+)): C<sub>26</sub>H<sub>34</sub><sup>35</sup>Cl<sub>2</sub><sup>194</sup>PtNa [M+Na]<sup>+</sup> calcd. 661.1623, found 661.1626; C<sub>26</sub>H<sub>34</sub><sup>35</sup>Cl<sup>37</sup>Cl<sup>194</sup>PtNa [M+Na]<sup>+</sup> calcd. 663.1594, found 663.1637; C<sub>26</sub>H<sub>34</sub><sup>37</sup>Cl<sub>2</sub><sup>194</sup>PtNa [M+Na]<sup>+</sup> calcd. 665.1564, found 665.1641; C<sub>26</sub>H<sub>34</sub><sup>35</sup>Cl<sub>2</sub><sup>195</sup>PtNa [M+Na]<sup>+</sup> calcd. 662.1644, found 662.1649; C<sub>26</sub>H<sub>34</sub><sup>35</sup>Cl<sup>37</sup>Cl<sup>195</sup>PtNa [M+Na]<sup>+</sup> calcd. 664.1615, found 664.1637; C<sub>26</sub>H<sub>34</sub><sup>37</sup>Cl<sub>2</sub><sup>195</sup>PtNa [M+Na]<sup>+</sup> calcd. 666.1585, found 666.1644; C<sub>26</sub>H<sub>34</sub><sup>35</sup>Cl<sub>2</sub><sup>196</sup>PtNa [M+Na]<sup>+</sup> calcd. 663.1646, found 663.1637; C<sub>26</sub>H<sub>34</sub><sup>35</sup>Cl<sup>37</sup>Cl<sup>196</sup>PtNa [M+Na]<sup>+</sup> calcd. 665.1617, found 665.1641; C<sub>26</sub>H<sub>34</sub><sup>37</sup>Cl<sub>2</sub><sup>196</sup>PtNa [M]<sup>+</sup> calcd. 667.1587, found 667.1635; C<sub>26</sub>H<sub>34</sub><sup>35</sup>Cl<sub>2</sub><sup>198</sup>PtNa [M+Na]<sup>+</sup> calcd. 665.1676, found 665.11641; C<sub>26</sub>H<sub>34</sub><sup>35</sup>Cl<sup>37</sup>Cl<sup>198</sup>PtNa [M+Na]<sup>+</sup> calcd. 667.1646, found 667.1635;

EA calcd. for C<sub>26</sub>H<sub>34</sub>Cl<sub>2</sub>N<sub>2</sub>Pt: C: 48.75, H: 5.35, N: 4.37; found C:48.22, H: 5.44, N: 4.42.

### 2.2.11 Synthesis of Bis(mesitylisonitrile)platinum(II) chloride (1c)

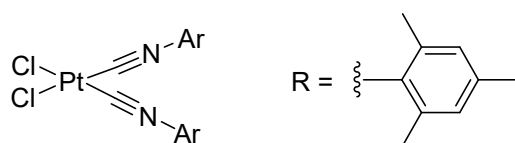

According to **GP4** the reaction was carried out with  $\text{PtCl}_2(\text{cod})$  (250 mg, 668  $\mu\text{mol}$ , 1.00 eq.) and mesityl isocyanide (213 mg, 1.47 mmol, 2.20 eq.). Title compound was obtained as a colorless solid (323 mg, 580  $\mu\text{mol}$ , 87 %).

$^1\text{H NMR}$  (400 MHz,  $\text{CD}_2\text{Cl}_2$ , 295 K)  $\delta$  [ppm] = 7.00 (d,  $J = 0.6$  Hz, 4H,  $4x\text{C}_{\text{ArH}}$ ), 2.43 (s, 12H,  $6x\text{-CH}_3$ ), 2.33 (s, 6H,  $2x\text{-CH}_3$ ).

$^{13}\text{C NMR}$  (101 MHz,  $\text{CD}_2\text{Cl}_2$ , 295 K)  $\delta$  [ppm] = 141.84 (s, 2C,  $2x\text{C}_{\text{Ar}}$ ), 136.27 (s, 6C,  $6x\text{C}_{\text{Ar}}$ ), 129.41 (d, 4C,  $4x\text{C}_{\text{ArH}}$ ), 21.54 (q, 2C,  $2x\text{-CH}_3$ ), 18.74 (q, 4C,  $4x\text{-CH}_3$ ).

$^{195}\text{Pt NMR}$  (86 MHz,  $\text{CD}_2\text{Cl}_2$ , 295 K)  $\delta$  [ppm] = -3750.70 (p,  $J = 117.2$  Hz).

**IR** (ATR)  $\tilde{\nu}$  [ $\text{cm}^{-1}$ ] = 2981 (w), 2919 (w), 2858 (w), 2738 (w), 2368 (w), 2230 (m), 2195 (s), 1606 (m), 1475 (m), 1440 (m), 1377 (w), 1310 (w), 1291 (w), 1202 (w), 1033 (m), 899 (s), 852 (m), 759 (m), 714 (w);

**HR-MS** (ESI (+)):  $\text{C}_{20}\text{H}_{22}^{35}\text{Cl}_2^{194}\text{PtNa}$  [ $\text{M}+\text{Na}$ ] $^+$  calcd. 577.0684, found 577.0681;  $\text{C}_{20}\text{H}_{22}^{35}\text{Cl}^{37}\text{Cl}^{194}\text{PtNa}$  [ $\text{M}+\text{Na}$ ] $^+$  calcd. 579.0655, found 579.0651;  $\text{C}_{20}\text{H}_{22}^{37}\text{Cl}_2^{194}\text{PtNa}$  [ $\text{M}+\text{Na}$ ] $^+$  calcd. 581.0625, found 581.0673;  $\text{C}_{20}\text{H}_{22}^{35}\text{Cl}_2^{195}\text{PtNa}$  [ $\text{M}+\text{Na}$ ] $^+$  calcd. 578.0705, found 578.0701;  $\text{C}_{20}\text{H}_{22}^{35}\text{Cl}^{37}\text{Cl}^{195}\text{PtNa}$  [ $\text{M}+\text{Na}$ ] $^+$  calcd. 580.0676, found 580.0672;  $\text{C}_{20}\text{H}_{22}^{35}\text{Cl}_2^{196}\text{PtNa}$  [ $\text{M}+\text{Na}$ ] $^+$  calcd. 579.0707, found 579.0704;  $\text{C}_{20}\text{H}_{22}^{35}\text{Cl}^{37}\text{Cl}^{196}\text{PtNa}$  [ $\text{M}+\text{Na}$ ] $^+$  calcd. 581.0678, found 581.0673;  $\text{C}_{20}\text{H}_{22}^{35}\text{Cl}_2^{198}\text{PtNa}$  [ $\text{M}+\text{Na}$ ] $^+$  calcd. 581.0736, found 581.0736;

**EA** calcd. for  $\text{C}_{20}\text{H}_{22}\text{Cl}_2\text{N}_2\text{Pt}$ : C: 43.17, H: 3.99, N: 5.03; found C: 42.34, H: 4.05, N: 4.91.

### 2.2.12 Synthesis of (((2-Aminobenzyl)amino)((2,6-diisopropylphenyl)amino)methylene)gold(I) chloride (2a)

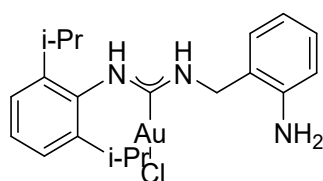

According to **GP5** the reaction was carried out with 2,6-diisopropylphenyl isocyanide gold(I) chloride (83.9 mg, 200  $\mu$ mol, 1.00 eq.) and 2-aminobenzylamine (24.4 mg, 200  $\mu$ mol, 1.00 eq.) Title compound was obtained as a colorless solid (94.0 mg, 173  $\mu$ mol, 87 % yield).

Analytical data is in accordance with literature.<sup>1</sup>

**<sup>1</sup>H NMR** (400 MHz, CD<sub>2</sub>Cl<sub>2</sub>, 295 K)  $\delta$  [ppm] = 8.34 (s, 1H, C<sub>Ar</sub>H), 7.41 – 7.33 (m, 1H, C<sub>Ar</sub>H), 7.22 (d,  $J$  = 7.8 Hz, 2H, 2xC<sub>Ar</sub>H), 7.09 (td,  $J$  = 7.6, 1.5 Hz, 1H, C<sub>Ar</sub>H), 6.98 (dd,  $J$  = 7.7, 1.6 Hz, 1H, C<sub>Ar</sub>H), 6.71 – 6.60 (m, 2H, C<sub>Ar</sub>H), 6.00 (t,  $J$  = 5.9 Hz, 1H, C<sub>Ar</sub>H), 4.81 (d,  $J$  = 5.8 Hz, 2H, -CH<sub>2</sub>-), 3.89 (s, 2H, -NH<sub>2</sub>), 3.10 (hept,  $J$  = 6.9 Hz, 2H, 2xCH), 1.19 (d,  $J$  = 6.8 Hz, 6H, 2x-CH<sub>3</sub>), 1.08 (d,  $J$  = 6.9 Hz, 6H, 2x-CH<sub>3</sub>);

### 2.2.13 Synthesis of (((3-Aminobenzyl)amino)(tert-butylamino)methylene)gold(I) chloride (2b)

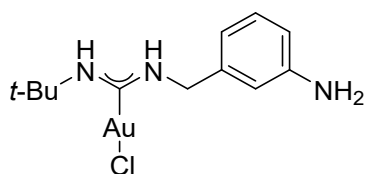

According to **GP5** the reaction was carried out with *tert*-butylisocyanide gold(I) chloride (63.1 mg, 200  $\mu$ mol, 1.00 eq.) and 3-aminobenzylamine (24.4 mg, 200  $\mu$ mol, 1.00 eq.) Title compound was obtained as a yellow solid (86.0 mg, 196  $\mu$ mol, 98 % yield).

Analytical data is in accordance with literature.<sup>1</sup>

**<sup>1</sup>H NMR** (600 MHz, CD<sub>2</sub>Cl<sub>2</sub>, 295 K)  $\delta$  [ppm] = 7.16 – 7.06 (m, 1H, Rotamers A, B and C, C<sub>Ar</sub>H), 6.83 – 6.17 (m, 1H, Rotamers A, B and C, C<sub>Ar</sub>H), 6.67 – 6.71 (m, 2H, Rotamers A, B and C, C<sub>Ar</sub>H), 6.61 – 6.57 (m, 1H, Rotamers A, B and C, C<sub>Ar</sub>H), 6.47 – 6.13 (m, 1H, Rotamers A, B and C, C<sub>Ar</sub>H), 6.45 - 5.37 (m, 1 H, Rotamers B and C, C<sub>Ar</sub>H), 6.19 (s, 1H, Rotamer A, C<sub>Ar</sub>H), 4.83 (d,  $J$  = 5.8 Hz, 2H, Rotamer C, -CH<sub>2</sub>-), 4.76 (d,  $J$  = 5.9 Hz, 2H, Rotamer B, -CH<sub>2</sub>-), 4.16 (d,  $J$  = 5.2 Hz, 2H, Rotamer A, -CH<sub>2</sub>-), 3.83 (s, 2H, Rotamers A, B and C, -NH<sub>2</sub>), 1.57 (s, 9H, Rotamer B, 3x-CH<sub>3</sub>), 1.49 (s, 9H, Rotamer A, 3x-CH<sub>3</sub>), 1.39 (s, 9H, Rotamer C, 3x-CH<sub>3</sub>).

## 2.2.14 Synthesis of (((3-Aminobenzyl)amino)((2,6-diisopropylphenyl)amino)methylene)gold(I) chloride (2c)

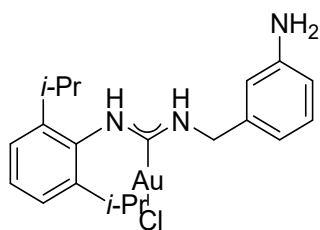

According to **GP5** the reaction was carried out with 2,6-diisopropylphenyl isocyanide gold(I) chloride (83.9 mg, 200  $\mu\text{mol}$ , 1.00 eq.) and 3-aminobenzylamine (24.4 mg, 200  $\mu\text{mol}$ , 1.00 eq.) Title compound was obtained as a colorless solid (103 mg, 190  $\mu\text{mol}$ , 95 % yield).

Analytical data is in accordance with literature.<sup>1</sup>

**<sup>1</sup>H NMR** (600 MHz,  $\text{CD}_2\text{Cl}_2$ , 295 K)  $\delta$  [ppm] 8.29 (s, 1H,  $\text{C}_{\text{ArH}}$ ), 7.38 (t,  $J = 7.7$  Hz, 1H,  $\text{C}_{\text{ArH}}$ ), 7.24 (d,  $J = 7.8$  Hz, 2H,  $2 \times \text{C}_{\text{ArH}}$ ), 7.06 (dd,  $J = 8.8, 7.2$  Hz, 1H,  $\text{C}_{\text{ArH}}$ ), 6.59 – 6.55 (m, 3H,  $3 \times \text{C}_{\text{ArH}}$ ), 6.15 (s, 1H,  $\text{C}_{\text{ArH}}$ ), 4.76 (d,  $J = 6.1$  Hz, 2H,  $-\text{CH}_2-$ ), 3.74 (s, 2H,  $-\text{NH}_2$ ), 3.11 (hept,  $J = 7.0$  Hz, 2H,  $2 \times \text{CH}$ ), 1.19 (d,  $J = 6.9$  Hz, 6H,  $2 \times \text{CH}_3$ ), 1.13 (d,  $J = 6.9$  Hz, 6H,  $2 \times \text{CH}_3$ );

## 2.2.15 Synthesis of (((3-Aminobenzyl)amino)(mesitylamino)methylene)gold(I) chloride (2d)

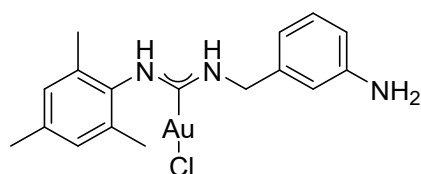

According to **GP5** the reaction was carried out with mesityl isocyanide gold(I) chloride (75.5 mg, 200  $\mu\text{mol}$ , 1.00 eq.) and 3-aminobenzylamine (24.4 mg, 200  $\mu\text{mol}$ , 1.00 eq.) Title compound was obtained as a colorless solid (98.0 mg, 196  $\mu\text{mol}$ , 98 % yield).

Analytical data is in accordance with literature.<sup>1</sup>

**<sup>1</sup>H NMR** (600 MHz,  $\text{CD}_2\text{Cl}_2$ , 295 K)  $\delta$  [ppm] = 7.86 (s, 1H,  $\text{C}_{\text{ArH}}$ ), 7.07 (t,  $J = 7.6$  Hz, 1H,  $\text{C}_{\text{ArH}}$ ), 6.96 (s, 2H,  $2 \times \text{C}_{\text{ArH}}$ ), 6.60 – 6.54 (m, 3H,  $3 \times \text{C}_{\text{ArH}}$ ), 6.21 (t,  $J = 6.2$  Hz, 1H,  $\text{C}_{\text{ArH}}$ ), 4.75 (d,  $J = 6.1$  Hz, 2H,  $-\text{CH}_2-$ ), 3.79 (s, 2H,  $-\text{NH}_2$ ), 2.26 (s, 3H,  $-\text{CH}_3$ ), 2.18 (s, 6H,  $2 \times \text{CH}_3$ );

### 2.2.16 Synthesis of (((4-Aminobenzyl)amino)(tert-butylamino)methylene)gold(I) chloride (2e)

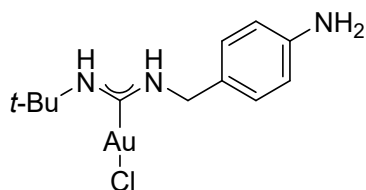

According to **GP5** the reaction was carried out with *tert*-butylisocyanide gold(I) chloride (63.0 mg, 200  $\mu$ mol, 1.00 eq.) and 4-aminobenzylamine (24.4 mg, 200  $\mu$ mol, 1.00 eq.) Title compound was obtained as a yellow solid (76.0 mg, 132  $\mu$ mol, 87 % yield).

Analytical data is in accordance with literature.<sup>1</sup>

**<sup>1</sup>H NMR** (700 MHz, CD<sub>2</sub>Cl<sub>2</sub>, 295 K)  $\delta$  [ppm] = 7.10 (d,  $J$  = 8.1 Hz, 2H, Rotamer B, 2x $C_{ArH}$ ), 7.06 (d,  $J$  = 8.2 Hz, 2H, Rotamer A, 2x $C_{ArH}$ ), 6.79-6.75 (m, 2H, Rotamer C, 2x $C_{ArH}$ ), 6.68 (d,  $J$  = 8.4 Hz, 2H, Rotamer A, 2x $C_{ArH}$ ), 6.66-6.65 (m, 2H, Rotamer C, 2x $C_{ArH}$ ), 6.63 (d,  $J$  = 8.1 Hz, 2H, Rotamer B, 2x $C_{ArH}$ ), 6.46-6.15 (m, 1H, Rotamers A, B and C,  $C_{ArH}$ ), 6.13 (s, 1H, Rotamers A, B and C,  $C_{ArH}$ ), 5.27 – 5.23 (m, 1H, Rotamers A, B and C,  $C_{ArH}$ ), 4.79 (d,  $J$  = 5.8 Hz, 2H, Rotamer C, - $CH_2$ -), 4.72 (d,  $J$  = 5.8 Hz, 1H, Rotamer B, - $CH_2$ -), 4.13 (d,  $J$  = 5.0 Hz, 1H, Rotamer A, - $CH_2$ -), 3.81 (s, 2H, Rotamers A, B and C, - $NH_2$ ), 1.55 (s, 9H, Rotamer B, 3x- $CH_3$ ), 1.50 (s, 9H, Rotamer A, 3x- $CH_3$ ), 1.36 (s, 9H, Rotamer C, 3x- $CH_3$ ).

### 2.2.17 Synthesis of (((4-Aminobenzyl)amino)((2,6-diisopropylphenyl)amino)methylene)gold(I) chloride (2f)

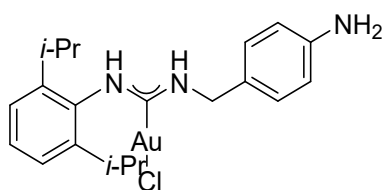

According to **GP5** the reaction was carried out with 2,6-diisopropylphenyl isocyanide gold(I) chloride (83.9 mg, 200  $\mu$ mol, 1.00 eq.) and 4-aminobenzylamine (24.4 mg, 200  $\mu$ mol, 1.00 eq.) Title compound was obtained as a colorless solid (91.0 mg, 168  $\mu$ mol, 84 % yield).

Analytical data is in accordance with literature.<sup>1</sup>



**<sup>1</sup>H NMR** (700 MHz, CDCl<sub>3</sub>, 295 K): δ [ppm] = 7.25 (t, *J* = 7.8 Hz, 1H, C<sub>Ar</sub>H), 7.10 (d, *J* = 7.8 Hz, 2H, 2xC<sub>Ar</sub>H), 6.92 (d, *J* = 8.0 Hz, 2H, 2xC<sub>Ar</sub>H), 6.47 (d, *J* = 8.0 Hz, 2H, 2xC<sub>Ar</sub>H), 4.61 (d, *J* = 6.0 Hz, 2H, -CH<sub>2</sub>-), 2.94 (p, *J* = 6.8 Hz, 2H, 2xCH), 1.04 (d, *J* = 6.8 Hz, 6H, 2x-CH<sub>3</sub>), 0.97 (d, *J* = 6.9 Hz, 6H, 2x-CH<sub>3</sub>);

### 2.2.18 Synthesis of (((4-Aminobenzyl)amino)(mesitylamino)methylene)gold(I) chloride (2g)

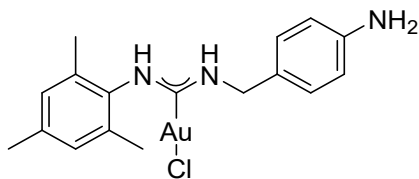

According to **GP5** the reaction was carried out with mesityl isocyanide gold(I) chloride (75.5 mg, 200 μmol, 1.00 eq.) and 4-aminobenzylamine (24.4 mg, 200 μmol, 1.00 eq.) Title compound was obtained as a yellow solid (97.0 mg, 194 μmol, 97 % yield).

**<sup>1</sup>H NMR** (600 MHz, CD<sub>2</sub>Cl<sub>2</sub>, 295 K) δ [ppm] = 7.73 (s, 1H C<sub>Ar</sub>H), 7.04 (d, *J* = 8.4 Hz, 2H, 2xC<sub>Ar</sub>H), 6.94 (s, 2H, 2xC<sub>Ar</sub>H), 6.61 (d, *J* = 8.4 Hz, 2H, 2xC<sub>Ar</sub>H), 6.16 (s, 1H, C<sub>Ar</sub>H), 4.73 (d, *J* = 6.0 Hz, 2H, -CH<sub>2</sub>-), 3.75 (s, 2H, -NH<sub>2</sub>), 2.25 (s, 3H, -CH<sub>3</sub>), 2.16 (s, 6H, 2x-CH<sub>3</sub>);

### 2.2.19 Synthesis of Gold(I) Platinum(II) Complex 3a

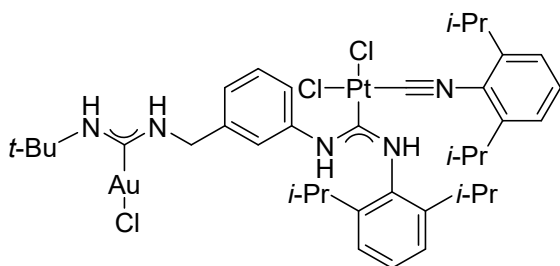

According to **GP6** the reaction was carried out with (((4-aminobenzyl)amino)(*tert*-butylamino)methylene)gold(I) chloride (50.0 mg, 114.23 μmol, 1.00 eq.) and bis(2,6-diisopropylphenylisonitrile) platinum(II) chloride (73.17 mg, 114.23 μmol, 1.00 eq.) Title compound was obtained as a colorless solid (81.0 mg, 75.12 μmol, 66 % yield).

According to **GP7** the reaction was carried out with chloro(dimethyl sulfide)gold(I) (30 mg, 102 μmol, 1.00 eq.), *tert*-butyl isocyanide (8.47 mg, 102 μmol, 1.00 eq.), 3-aminobenzylamine (12.4 mg, 102 μmol, 1.00 eq.) and bis(2,6-diisopropylphenyl) platinum(II) chloride (65.2 mg,

102  $\mu\text{mol}$ , 1.00 eq.). Title compound was obtained as a colorless solid (69.0 mg, 63.99  $\mu\text{mol}$ , 63 %).

**m.p.** = 195 – 200  $^{\circ}\text{C}$

**$^1\text{H}$  NMR** (400 MHz,  $\text{CD}_2\text{Cl}_2$ , 295 K)  $\delta$  [ppm] = 8.76 – 8.46 (m, 1H,  $\text{NH}$ ), 7.83 – 7.74 (m, 1H,  $\text{NH}$ ), 7.72 – 7.61 (m, 1H,  $\text{NH}$ ), 7.59 – 7.47 (m, 1H,  $\text{NH}$ ), 7.44 – 7.35 (m, 2H,  $2x\text{C}_{\text{Ar}}\text{H}$ ), 7.27 (d,  $J = 7.9$  Hz, 2H,  $2x\text{C}_{\text{Ar}}\text{H}$ ), 7.18 (d,  $J = 7.9$  Hz, 1H,  $\text{C}_{\text{Ar}}\text{H}$ ), 7.14 – 7.10 (m, 1H,  $\text{C}_{\text{Ar}}\text{H}$ ), 7.09 – 6.99 (m, 1H,  $2x\text{C}_{\text{Ar}}\text{H}$ ), 5.01 – 3.81 (m, 2H,  $-\text{CH}_2-$ ), 3.27 (tp,  $J = 13.8, 7.0$  Hz, 3H,  $3x-\text{CH}(\text{CH}_3)_2$ ), 2.89 – 2.70 (m, 1H,  $-\text{CH}(\text{CH}_3)_2$ ), 1.54 – 1.36 (m, 9H,  $3x-\text{CH}_3$ ), 1.21 (d,  $J = 6.9$  Hz, 9H,  $3x-\text{CH}_3$ ), 1.16 (d,  $J = 2.1$  Hz, 3H,  $-\text{CH}_3$ ), 1.14 (d,  $J = 2.0$  Hz, 3H,  $-\text{CH}_3$ ), 1.07 (d,  $J = 6.9$  Hz, 9H,  $3x-\text{CH}_3$ ).

**$^{13}\text{C}$  NMR** (101 MHz,  $\text{CD}_2\text{Cl}_2$ , 295 K)  $\delta$  [ppm] = 193.28 (s, 1C,  $\text{C}_{\text{Carbene}}$ ), 169.89 (s, 1C,  $\text{C}_{\text{Carbene}}$ ), 147.10 (s, 1C,  $\text{C}_{\text{Ar}}$ ), 146.69 (s, 1C,  $\text{C}_{\text{Ar}}$ ), 145.91 (s, 1C,  $\text{C}_{\text{Ar}}$ ), 140.17 (s, 1C,  $\text{C}_{\text{Ar}}$ ), 139.11 (s, 1C,  $\text{C}_{\text{Ar}}$ ), 137.73 (s, 1C,  $\text{C}_{\text{Ar}}$ ), 131.74 (s, 2C,  $2x\text{C}_{\text{Ar}}$ ), 131.37 (d, 1C,  $\text{C}_{\text{Ar}}\text{H}$ ), 130.98 (d, 1C,  $\text{C}_{\text{Ar}}\text{H}$ ), 130.00 (d, 1C,  $\text{C}_{\text{Ar}}\text{H}$ ), 129.68 (d, 1C,  $\text{C}_{\text{Ar}}\text{H}$ ), 129.54 (s, 1C,  $\text{C}_{\text{Ar}}$ ), 127.04 (d, 1C,  $\text{C}_{\text{Ar}}\text{H}$ ), 125.93 (d, 1C,  $\text{C}_{\text{Ar}}\text{H}$ ), 125.68 (d, 1C,  $\text{C}_{\text{Ar}}\text{H}$ ), 124.33 (d, 1C,  $\text{C}_{\text{Ar}}\text{H}$ ), 123.99 (d, 1C,  $\text{C}_{\text{Ar}}\text{H}$ ), 122.20 (d, 1C,  $\text{C}_{\text{Ar}}\text{H}$ ), 54.82 (t, 1C,  $-\text{CH}_2-$ ), 31.58 (d, 2C,  $2x-\text{CH}(\text{CH}_3)_2$ ), 30.38 (d, 2C,  $2x-\text{CH}(\text{CH}_3)_2$ ), 30.00 (q, 1C,  $-\text{CH}_3$ ), 29.94 (s, 1C,  $-\text{C}(\text{CH}_3)_3$ ), 29.09 (q, 1C,  $-\text{CH}_3$ ), 29.00 (q, 1C,  $-\text{CH}_3$ ), 24.66 (q, 2C,  $2x-\text{CH}_3$ ), 23.67 (q, 2C,  $2x-\text{CH}_3$ ), 22.96 (q, 2C,  $2x-\text{CH}_3$ ), 22.84 (q, 2C,  $2x-\text{CH}_3$ );

**$^{195}\text{Pt}$  NMR** (86 MHz,  $\text{CD}_2\text{Cl}_2$ , 295 K)  $\delta$  [ppm] = -3497.23 (s, 1Pt);

**IR** (ATR)  $\tilde{\nu}$  [ $\text{cm}^{-1}$ ] = 3264 (w), 3069 (m), 2964 (w), 2928 (w), 2869 (m), 2188 (m), 1693 (w), 1626 (w), 1546 (s), 1462 (m), 1387 (m), 1364 (w), 1303 (m), 1201 (w), 1110 (w), 1061 (w), 972 (w), 936 (m), 798 (m), 748 (m), 697 (m);

**HR-MS** (MALDI):  $\text{C}_{38}\text{H}_{53}\text{Au}^{35}\text{Cl}_2\text{N}_5^{192}\text{Pt}$  [ $\text{M}-\text{Cl}$ ] $^+$  calcd. 1038.2954, found 1038.2948;  $\text{C}_{38}\text{H}_{53}\text{Au}^{35}\text{Cl}^{37}\text{ClN}_5^{192}\text{Pt}$  [ $\text{M}-\text{Cl}$ ] $^+$  calcd. 1040.2924, found 1040.2959;  $\text{C}_{38}\text{H}_{53}\text{Au}^{37}\text{Cl}_2\text{N}_5^{192}\text{Pt}$  [ $\text{M}-\text{Cl}$ ] $^+$  calcd. 1042.2895, found 1042.2978;  $\text{C}_{38}\text{H}_{53}\text{Au}^{35}\text{Cl}_2\text{N}_5^{194}\text{Pt}$  [ $\text{M}-\text{Cl}$ ] $^+$  calcd. 1040.2970, found 1040.2959;  $\text{C}_{38}\text{H}_{53}\text{Au}^{35}\text{Cl}^{37}\text{ClN}_5^{194}\text{Pt}$  [ $\text{M}-\text{Cl}$ ] $^+$  calcd. 1042.2941, found 1042.2978;  $\text{C}_{38}\text{H}_{53}\text{Au}^{37}\text{Cl}_2\text{N}_5^{194}\text{Pt}$  [ $\text{M}-\text{Cl}$ ] $^+$  calcd. 1044.2911, found 1044.2979;  $\text{C}_{38}\text{H}_{53}\text{Au}^{35}\text{Cl}_2\text{N}_5^{195}\text{Pt}$  [ $\text{M}-\text{Cl}$ ] $^+$  calcd. 1041.2991, found 1041.2986;  $\text{C}_{38}\text{H}_{53}\text{Au}^{35}\text{Cl}^{37}\text{ClN}_5^{195}\text{Pt}$  [ $\text{M}-\text{Cl}$ ] $^+$  calcd. 1043.2962, found 1043.2978;  $\text{C}_{38}\text{H}_{53}\text{Au}^{37}\text{Cl}_2\text{N}_5^{195}\text{Pt}$  [ $\text{M}-\text{Cl}$ ] $^+$  calcd. 1045.2932, found 1045.2989;  $\text{C}_{38}\text{H}_{53}\text{Au}^{35}\text{Cl}_2\text{N}_5^{196}\text{Pt}$  [ $\text{M}-\text{Cl}$ ] $^+$  calcd. 1042.2993, found 1042.2978;  $\text{C}_{38}\text{H}_{53}\text{Au}^{35}\text{Cl}^{37}\text{ClN}_5^{196}\text{Pt}$  [ $\text{M}-\text{Cl}$ ] $^+$  calcd. 1044.2963, found 1044.2979;  $\text{C}_{38}\text{H}_{53}\text{Au}^{37}\text{Cl}_2\text{N}_5^{196}\text{Pt}$  [ $\text{M}-\text{Cl}$ ] $^+$  calcd. 1046.2934,

found 1046.2980;  $C_{38}H_{53}Au^{35}Cl_2N_5^{198}Pt$   $[M-Cl]^+$  calcd. 1044.3022, found 1044.2979;  $C_{38}H_{53}Au^{35}Cl^{37}ClN_5^{198}Pt$   $[M-Cl]^+$  calcd. 1046.2993, found 1046.2980;  $C_{38}H_{53}Au^{37}Cl_2N_5^{198}Pt$   $[M-Cl]^+$  calcd. 1048.2963, found 1048.2992;

EA calcd. for  $C_{38}H_{53}Cl_3AuN_5Pt$ : C: 42.33, H: 4.95, N: 6.50; found C: 41.61, H: 5.14, N: 6.36.

## 2.2.20 Synthesis of Gold(I) Platinum(II) Complex 3b

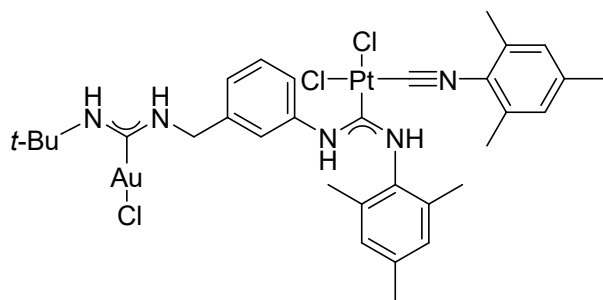

According to **GP6** the reaction was carried out with (((3-aminobenzyl)amino)(*tert*-butylamino)methylene)gold(I) chloride (50.0 mg, 114.23  $\mu$ mol, 1.00 eq.) and bis(2,4,6-trimethylphenyl)isonitrile platinum(II) chloride (63.56 mg, 114.23  $\mu$ mol, 1.00 eq.) Title compound was obtained as a colorless solid (86.0 mg, 86.51  $\mu$ mol, 75 % yield).

According to **GP7** the reaction was carried out with chloro(dimethyl sulfide)gold(I) (30 mg, 102  $\mu$ mol, 1.00 eq.), *tert*-butyl isocyanide (8.47 mg, 102  $\mu$ mol, 1.00 eq.), 3-aminobenzylamine (12.4 mg, 102  $\mu$ mol, 1.00 eq.) and bis(2,4,6-trimethylphenyl) platinum(II) chloride (56.67 mg, 102  $\mu$ mol, 1.00 eq.). Title compound was obtained as a colorless solid (74.0 mg, 74.44  $\mu$ mol, 73 %).

Mixture of two rotamers: A (75 %), B (25 %).

**m.p.** = 212 – 217 °C;

**$^1H$  NMR** (400 MHz,  $CD_2Cl_2$ , 295 K)  $\delta$  [ppm] = 9.07 (s, 1H, Rotamer A,  $NH$ ), 8.66 (s, 1H, Rotamer B,  $NH$ ), 8.58 – 7.84 (m, 1H, Rotamers A and B,  $NH$ ), 7.72 (s, 1H, Rotamer A,  $2xNH$ ), (s, 1H, Rotamer B,  $2xNH$ ), 7.15 – 7.00 (m, 2H, Rotamer A and B,  $2xC_{Ar}H$ ), 6.99 – 6.84 (m, 4H, Rotamer A and B,  $4xC_{Ar}H$ ), 6.76 – 6.63 (m, 2H, Rotamer A and B,  $2xC_{Ar}H$ ), 4.91 (m, 2H, Rotamer A,  $-CH_2-$ ), 4.79 – 4.04 (m, 2H, Rotamer B,  $-CH_2-$ ), 2.34 (s, 3H, Rotamers A and B,  $-CH_3$ ), 2.31 (s, 3H, Rotamers A and B,  $-CH_3$ ), 2.28 – 2.20 (s, 3H, Rotamers A and B,  $-CH_3$ ), 2.15 (m, 3H, (s, 3H, Rotamers A and B,  $-CH_3$ ), 2.09 – 1.99 (m, 3H, Rotamers A and B,  $-CH_3$ ), 1.95 (s, 3H, Rotamers A and B,  $-CH_3$ ), 1.49 – 1.28 (m, 9H, Rotamers A and B,  $3x-CH_3$ );

**$^{13}\text{C}$  NMR** (126 MHz,  $\text{CD}_2\text{Cl}_2$ , 295 K)  $\delta$  [ppm] = 192.65 (s, 1C, Rotamer A,  $\underline{\text{C}}_{\text{Carbene}}$ ), 192.61 (s, 1C, Rotamer B,  $\underline{\text{C}}_{\text{Carbene}}$ ), 173.01 (s, 1C, Rotamer B,  $\underline{\text{C}}_{\text{Carbene}}$ ), 168.01 (s, 1C, Rotamer A,  $\underline{\text{C}}_{\text{Carbene}}$ ), 141.56 (s, 1C, Rotamer A,  $\underline{\text{C}}_{\text{Ar}}$ ), 140.37 (s, 1C, Rotamer A,  $\underline{\text{C}}_{\text{Ar}}$ ), 140.22 (s, 2C, Rotamer B,  $2x\underline{\text{C}}_{\text{Ar}}$ ), 140.19 (s, 1C, Rotamer B,  $\underline{\text{C}}_{\text{Ar}}$ ), 140.02 (s, 1C, Rotamer A,  $\underline{\text{C}}_{\text{Ar}}$ ), 138.55 (s, 1C, Rotamer A,  $\underline{\text{C}}_{\text{Ar}}$ ), 136.09 (s, 1C, Rotamer B,  $\underline{\text{C}}_{\text{Ar}}$ ), 136.06 (s, 2C, Rotamer B,  $2x\underline{\text{C}}_{\text{Ar}}$ ), 135.98 (s, 2C, Rotamer A,  $2x\underline{\text{C}}_{\text{Ar}}$ ) 135.16 (s, 2C, Rotamer A,  $2x\underline{\text{C}}_{\text{Ar}}$ ), 130.32 (d, 1C, Rotamer A,  $\text{C}_{\text{ArH}}$ ), 130.33 (s, 1C, Rotamer B,  $\underline{\text{C}}_{\text{Ar}}$ ), 130.27 (d, 2C, Rotamer A,  $2x\underline{\text{C}}_{\text{ArH}}$ ), 130.02 (s, 1C, Rotamer A,  $\underline{\text{C}}_{\text{Ar}}$ ), 129.94 (d, 2C, Rotamer B,  $2x\underline{\text{C}}_{\text{ArH}}$ ), 129.74 (d, 1C, Rotamer B,  $\underline{\text{C}}_{\text{ArH}}$ ), 129.70 (s, 1C, Rotamer B,  $\underline{\text{C}}_{\text{Ar}}$ ), 129.58 (d, 1C, Rotamer B,  $\underline{\text{C}}_{\text{ArH}}$ ), 129.29 (d, 1C, Rotamer A,  $\text{C}_{\text{ArH}}$ ), 129.11 (d, 1C, Rotamer A,  $\text{C}_{\text{ArH}}$ ), 128.80 (d, 1C, Rotamer B,  $\underline{\text{C}}_{\text{ArH}}$ ), 128.76 (d, 1C, Rotamer B,  $\underline{\text{C}}_{\text{ArH}}$ ), 128.71 (d, 1C, Rotamer A,  $\text{C}_{\text{ArH}}$ ), 127.28 (s, 1C, Rotamer B,  $\underline{\text{C}}_{\text{Ar}}$ ), 126.50 (d, 1C, Rotamer B,  $\underline{\text{C}}_{\text{ArH}}$ ), 126.01 (d, 1C, Rotamer A,  $\text{C}_{\text{ArH}}$ ), 125.54 (d, 1C, Rotamer B,  $\underline{\text{C}}_{\text{ArH}}$ ), 122.30 (d, 1C, Rotamer A,  $\text{C}_{\text{ArH}}$ ), 120.93 (s, 1C, Rotamer A,  $\underline{\text{C}}_{\text{Ar}}$ ), 120.56 (s, 1C, Rotamer B,  $\underline{\text{C}}_{\text{Ar}}$ ), 114.07 (s, 1C, Rotamer B,  $\underline{\text{C}}_{\text{Ar}}$ ), 113.59 (s, 1C, Rotamer A,  $\underline{\text{C}}_{\text{Ar}}$ ), 54.64 (t, 1C, Rotamer A,  $-\underline{\text{C}}\text{H}_2-$ ), 53.55 (t, 1C, Rotamer B,  $-\underline{\text{C}}\text{H}_2-$ ); 31.27 (s, 1C, Rotamer A,  $-\underline{\text{C}}(\text{CH}_3)_3$ ), 31.16 (q, 3C, Rotamers A and B,  $3x-\underline{\text{C}}\text{H}_3$ ), 30.21 (s, 1C, Rotamer B,  $-\underline{\text{C}}(\text{CH}_3)_3$ ); 21.28 (q, 2C, Rotamer A,  $2x-\underline{\text{C}}\text{H}_3$ ), 21.15 (q, 2C, Rotamer B,  $2x-\underline{\text{C}}\text{H}_3$ ), 20.96 (q, 2C, Rotamer B,  $2x-\underline{\text{C}}\text{H}_3$ ), 18.48 (q, 2C, Rotamer A,  $2x-\underline{\text{C}}\text{H}_3$ ), 18.41 (q, 2C, Rotamer B,  $2x-\underline{\text{C}}\text{H}_3$ ), 18.29 (q, 2C, Rotamer A,  $2x-\underline{\text{C}}\text{H}_3$ );

**$^{195}\text{Pt}$  NMR** (86 MHz,  $\text{CD}_2\text{Cl}_2$ , 295 K)  $\delta$  [ppm] -3488.05 (s, 1Pt, Rotamer A or B), -3526.87 (s, 1Pt, Rotamer A or B);

**IR** (ATR)  $\tilde{\nu}$  [ $\text{cm}^{-1}$ ] = 3277 (w), 2961 (w), 2920 (w), 2862 (w), 2191 (s), 1695 (m), 1546 (s), 1477 (m), 1444 (m), 1365 (w), 1310 (w), 1229 (w), 1201 (m), 1035 (w), 971 (w), 855 (m), 800 (w), 697 (m);

**HR-MS** (MALDI):  $\text{C}_{32}\text{H}_{41}\text{Au}^{35}\text{Cl}_2\text{N}_5^{192}\text{Pt}$   $[\text{M}-\text{Cl}]^+$  calcd. 954.2015, found 954.2014;  $\text{C}_{32}\text{H}_{41}\text{Au}^{35}\text{Cl}^{37}\text{ClN}_5^{192}\text{Pt}$   $[\text{M}-\text{Cl}]^+$  calcd. 956.1985, found 956.2030;  $\text{C}_{32}\text{H}_{41}\text{Au}^{37}\text{Cl}_2\text{N}_5^{192}\text{Pt}$   $[\text{M}-\text{Cl}]^+$  calcd. 958.1956, found 958.1269;  $\text{C}_{32}\text{H}_{41}\text{Au}^{35}\text{Cl}_2\text{N}_5^{194}\text{Pt}$   $[\text{M}-\text{Cl}]^+$  calcd. 956.2031, found 956.2030;  $\text{C}_{32}\text{H}_{41}\text{Au}^{35}\text{Cl}^{37}\text{ClN}_5^{194}\text{Pt}$   $[\text{M}-\text{Cl}]^+$  calcd. 958.2002, found 958.1269;  $\text{C}_{32}\text{H}_{41}\text{Au}^{37}\text{Cl}_2\text{N}_5^{194}\text{Pt}$   $[\text{M}-\text{Cl}]^+$  calcd. 960.1972, found 960.2046;  $\text{C}_{32}\text{H}_{41}\text{Au}^{35}\text{Cl}_2\text{N}_5^{195}\text{Pt}$   $[\text{M}-\text{Cl}]^+$  calcd. 957.2052, found 957.2055;  $\text{C}_{32}\text{H}_{41}\text{Au}^{35}\text{Cl}^{37}\text{ClN}_5^{195}\text{Pt}$   $[\text{M}-\text{Cl}]^+$  calcd. 959.2023, found 959.2045;  $\text{C}_{32}\text{H}_{41}\text{Au}^{37}\text{Cl}_2\text{N}_5^{195}\text{Pt}$   $[\text{M}-\text{Cl}]^+$  calcd. : 961.1993, found 961.2054;  $\text{C}_{32}\text{H}_{41}\text{Au}^{35}\text{Cl}_2\text{N}_5^{196}\text{Pt}$   $[\text{M}-\text{Cl}]^+$  calcd. 958.2054, found 958.2045;  $\text{C}_{32}\text{H}_{41}\text{Au}^{35}\text{Cl}^{37}\text{ClN}_5^{196}\text{Pt}$   $[\text{M}-\text{Cl}]^+$  calcd. 960.2024, found 960.2046;  $\text{C}_{32}\text{H}_{41}\text{Au}^{37}\text{Cl}_2\text{N}_5^{196}\text{Pt}$   $[\text{M}-\text{Cl}]^+$  calcd. 962.1995, found 962.2044;  $\text{C}_{32}\text{H}_{41}\text{Au}^{35}\text{Cl}_2\text{N}_5^{198}\text{Pt}$   $[\text{M}-\text{Cl}]^+$  calcd. 960.2083, found 960.2046;

$C_{32}H_{41}Au^{35}Cl^{37}N_5^{198}Pt [M-Cl]^+$  calcd. 962.2054, found 962.2044;  $C_{32}H_{41}Au^{37}Cl_2N_5^{198}Pt [M-Cl]^+$  calcd. 964.2024, found 964.2062;

EA calcd. for  $C_{32}H_{41}Cl_3AuN_5Pt$ : C: 38.66, H: 4.16, N: 7.04; found C: 38.17, H: 4.30, N: 6.95.

### 2.2.21 Synthesis of Gold(I) Platinum(II) Complex 3c

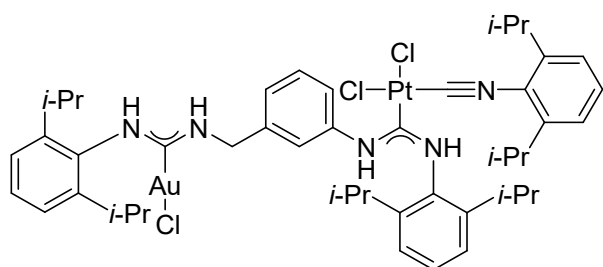

According to **GP6** the reaction was carried out with (((3-aminobenzyl)amino)((2,6-diisopropylphenyl)amino)methylene)gold(I) chloride (50.0 mg, 92.27  $\mu$ mol, 1.00 eq.) and bis(2,6-diisopropylphenylisonitrile) platinum(II) chloride (59.11 mg, 92.27  $\mu$ mol, 1.00 eq.) Title compound was obtained as a colorless solid (81.0 mg, 68.50  $\mu$ mol, 74 % yield).

According to **GP7** the reaction was carried out with chloro(dimethyl sulfide)gold(I) (30 mg, 102  $\mu$ mol, 1.00 eq.), 2,6-diisopropylphenyl isocyanide (19.08 mg, 102  $\mu$ mol, 1.00 eq.), 3-aminobenzylamine (12.4 mg, 102  $\mu$ mol, 1.00 eq.) and bis(2,6-diisopropylphenyl) platinum(II) chloride (65.2 mg, 102  $\mu$ mol, 1.00 eq.). Title compound was obtained as a colorless solid (83 mg, 70.19  $\mu$ mol, 69 %).

Mixture of two rotamers: A (63 %), B (37 %)

m.p. = 192 – 197 °C

$^1H$  NMR (400 MHz,  $CD_2Cl_2$ , 295 K)  $\delta$  [ppm] = 8.96 – 8.81 (m, 1H, Rotamer A,  $NH$ ), 8.80 (d,  $J$  = 17.1 Hz, 1H, Rotamer B,  $NH$ ), 8.42 (s, 1H, Rotamer A,  $NH$ ), 8.37 – 8.20 (m, 1H, Rotamer B,  $NH$ ), 7.84 – 7.60 (m, 1H, Rotamers A and B,  $C_{Ar}H$ ), 7.72 (td,  $J$  = 6.5, 1.7 Hz, 2H, Rotamer A, 2x $NH$ ), 7.63 (s, 2H, Rotamer B, 2x $NH$ ), 7.53 – 7.41 (m, 4H, Rotamers A and B,  $C_{Ar}H$ ), 7.29 – 7.02 (m, 6H, Rotamers A and B, 6x $C_{Ar}H$ ), 7.02 – 6.75 (m, 1H, Rotamers A and B,  $C_{Ar}H$ ); 6.58 (s, 1H,  $C_{Ar}H$ ), 6.57 – 6.55 (m, 1H, Rotamer B,  $C_{Ar}H$ ), 6.22 (t,  $J$  = 6.2 Hz, 1H,  $C_{Ar}H$ ), 6.12 (t,  $J$  = 6.1 Hz, 1H, Rotamer B,  $C_{Ar}H$ ), 5.09 – 4.83 (m, 2H, Rotamer B,  $-CH_2-$ ), 4.79 – 4.58 (m, 2H, Rotamer A,  $-CH_2-$ ), 3.35 (dt,  $J$  = 13.8, 6.9 Hz, 6H, 6x- $CH(CH_3)_2$ ), 3.30 – 2.82 (m, 6H, Rotamer B, 6x- $CH(CH_3)_2$ ), 1.30 (d,  $J$  = 6.8 Hz, 24H, Rotamer A, 8x- $CH_3$ ), 1.17 (d,  $J$  = 6.8 Hz,

12H, Rotamer A 4x-CH<sub>3</sub>), 1.28 – 1.19 (m, 12H, Rotamer B, 4x-CH<sub>3</sub>), 1.15 – 1.09 (m, 18H, Rotamer B, 6x-CH<sub>3</sub>), 1.10 – 1.00 (m, 6H, Rotamer B, 2x-CH<sub>3</sub>).

<sup>13</sup>C NMR (101 MHz, CD<sub>2</sub>Cl<sub>2</sub>, 295 K) δ [ppm] = 192.10 (s, 1C, Rotamer B, C<sub>Carbene</sub>), 191.29 (s, 1C, Rotamer A, C<sub>Carbene</sub>), 169.74 (s, 1C, Rotamer A, C<sub>Carbene</sub>), 169.33 (s, 1C, Rotamer B, C<sub>Carbene</sub>), 161.47 (s, 1C, Rotamer A, C<sub>Ar</sub>), 159.29 (s, 1C, Rotamer B, C<sub>Ar</sub>), 153.08 (s, 1C, Rotamer A, C<sub>Ar</sub>), 152.16 (s, 1C, Rotamer B, C<sub>Ar</sub>), 147.64 (s, 1C, Rotamer A, C<sub>Ar</sub>), 147.40 (s, 1C, Rotamer B, C<sub>Ar</sub>), 147.15 (s, 1C, Rotamer A, C<sub>Ar</sub>), 146.89 (s, 2C, Rotamer A, C<sub>Ar</sub>), 146.83 (s, 1C, Rotamer B, C<sub>Ar</sub>), 146.69 (s, 2C, Rotamer A, 2xC<sub>Ar</sub>), 145.99 (s, 1C, Rotamer A, C<sub>Ar</sub>), 145.98 (s, 1C, Rotamer B, C<sub>Ar</sub>), 145.87 (s, 1C, Rotamer B, C<sub>Ar</sub>), 140.38 (s, 1C, Rotamer A, C<sub>Ar</sub>), 139.71 (s, 1C, Rotamer B, C<sub>Ar</sub>), 138.90 (s, 1C, Rotamer A, C<sub>Ar</sub>), 138.36 (s, 1C, Rotamer B, C<sub>Ar</sub>), 138.19 (s, 1C, Rotamer A, C<sub>Ar</sub>), 138.14 (s, 2C, Rotamer B, 2xC<sub>Ar</sub>), 137.73 (s, 1C, Rotamer B, C<sub>Ar</sub>), 137.61 (s, 1C, Rotamer B, C<sub>Ar</sub>), 135.35 (s, 1C, Rotamer A, C<sub>Ar</sub>), 131.72 (d, 1C, Rotamer A, C<sub>Ar</sub>H), 131.23 (d, 1C, Rotamer A, C<sub>Ar</sub>H), 130.96 (d, 1C, Rotamer B, C<sub>Ar</sub>H), 130.74 (d, 1C, Rotamer A, C<sub>Ar</sub>H), 130.65 (d, 1C, Rotamer B, C<sub>Ar</sub>H), 130.19 (d, 1C, Rotamer A, C<sub>Ar</sub>H), 130.04 (d, 1C, Rotamer B, C<sub>Ar</sub>H), 130.00 (d, 1C, Rotamer B, C<sub>Ar</sub>H), 129.64 (d, 1C, Rotamer A, C<sub>Ar</sub>H), 129.51 (d, 1C, Rotamer B, C<sub>Ar</sub>H), 129.22 (d, 1C, Rotamer A, C<sub>Ar</sub>H), 127.27 (d, 1C, Rotamer B, C<sub>Ar</sub>H), 126.53 (d, 1C, Rotamer B, C<sub>Ar</sub>H), 126.17 (d, 1C, Rotamer B, C<sub>Ar</sub>H), 125.64 (d, 1C, Rotamer B, C<sub>Ar</sub>H), 125.57 (d, 1C, Rotamer B, C<sub>Ar</sub>H), 125.19 (d, 1C, Rotamer A, C<sub>Ar</sub>H), 125.15 (d, 1C, Rotamer A, C<sub>Ar</sub>H), 124.71 (d, 1C, Rotamer B, C<sub>Ar</sub>H), 124.32 (d, 1C, Rotamer A, C<sub>Ar</sub>H), 123.96 (d, 1C, Rotamer A, C<sub>Ar</sub>H), 123.16 (d, 1C, Rotamer A, C<sub>Ar</sub>H), 122.58 (d, 1C, Rotamer A, C<sub>Ar</sub>H), 117.51 (d, 1C, Rotamer B, C<sub>Ar</sub>H), 114.92 (d, 1C, Rotamer A, C<sub>Ar</sub>H), 114.13 (d, 1C, Rotamer B, C<sub>Ar</sub>H); 54.23 (t, 1C, Rotamer A, -CH<sub>2</sub>-), 53.06 (t, 1C, Rotamer B, -CH<sub>2</sub>-), 30.38 (d, 4C, Rotamer A, 4x-CH(CH<sub>3</sub>)<sub>2</sub>), 29.99 (d, 1C, Rotamer B, -CH(CH<sub>3</sub>)<sub>2</sub>), 29.94 (d, 1C, Rotamer B, -CH(CH<sub>3</sub>)<sub>2</sub>), 29.90 (d, 1C, Rotamer B, -CH(CH<sub>3</sub>)<sub>2</sub>), 29.10 (d, 2C, Rotamer A, 2x-CH(CH<sub>3</sub>)<sub>2</sub>), 29.00 (d, 1C, Rotamer B, -CH(CH<sub>3</sub>)<sub>2</sub>), 28.88 (d, 1C, Rotamer B, -CH(CH<sub>3</sub>)<sub>2</sub>), 28.53 (d, 1C, Rotamer B, -CH(CH<sub>3</sub>)<sub>2</sub>), 24.90 (q, 2C, Rotamer B, 2x-CH<sub>3</sub>), 24.83 (q, 1C, Rotamer B, -CH<sub>3</sub>), 24.67 (q, 1C, Rotamer B, -CH<sub>3</sub>), 24.64 (q, 1C, Rotamer B, -CH<sub>3</sub>), 24.10 (q, 1C, Rotamer B, -CH<sub>3</sub>), 23.85 (q, 1C, Rotamer B, -CH<sub>3</sub>), 23.65 (q, 2C, Rotamer B, 2x-CH<sub>3</sub>), 23.59 (q, 1C, Rotamer B, -CH<sub>3</sub>), 23.15 (q, 1C, Rotamer B, -CH<sub>3</sub>), 23.12 (q, 1C, Rotamer B, -CH<sub>3</sub>), 22.96 (q, 4C, Rotamer A, 4x-CH<sub>3</sub>), 22.94 (q, 4C, Rotamer A, 4x-CH<sub>3</sub>), 22.85 (q, 4C, Rotamer A, 4x-CH<sub>3</sub>);

<sup>195</sup>Pt NMR (86 MHz, CD<sub>2</sub>Cl<sub>2</sub>, 295 K) δ [ppm] = -3501.86 (s, 1Pt, Rotamer A or B), -3522.88 (s, 1Pt, Rotamer A or B);

**IR** (ATR)  $\tilde{\nu}$  [ $\text{cm}^{-1}$ ] = 3229 (m), 2963 (m), 2927 (w), 2868 (w), 2188 (m), 1691 (w), 1591 (s), 1546 (m), 1492 (m), 1461 (w), 1385 (w), 1364 (m), 1303 (w), 1180 (m), 1108 (w), 1060 (w), 936 (w), 799 (m), 749 (m), 695 (m);

**HR-MS** (ESI (+)):  $\text{C}_{46}\text{H}_{61}\text{Au}^{35}\text{Cl}_2\text{N}_5^{192}\text{Pt}$  [M]<sup>+</sup> calcd. 1142.3580, found 1142.3586;  $\text{C}_{46}\text{H}_{61}\text{Au}^{35}\text{Cl}^{37}\text{ClN}_5^{192}\text{Pt}$  [M]<sup>+</sup> calcd. 1144.3550, found 1144.3592;  $\text{C}_{46}\text{H}_{61}\text{Au}^{37}\text{Cl}_2\text{N}_5^{192}\text{Pt}$  calcd. 1146.3521, found 1146.3641;  $\text{C}_{46}\text{H}_{61}\text{Au}^{35}\text{Cl}_2\text{N}_5^{194}\text{Pt}$  [M]<sup>+</sup> calcd. 1144.3596, found 1144.3592;  $\text{C}_{46}\text{H}_{61}\text{Au}^{35}\text{Cl}^{37}\text{ClN}_5^{194}\text{Pt}$  [M]<sup>+</sup> calcd. 1146.3567, found 1146.3641;  $\text{C}_{46}\text{H}_{61}\text{Au}^{37}\text{Cl}_2\text{N}_5^{194}\text{Pt}$  [M]<sup>+</sup> calcd. 1148.3537, found 1148.3605;  $\text{C}_{46}\text{H}_{61}\text{Au}^{35}\text{Cl}_2\text{N}_5^{195}\text{Pt}$  [M]<sup>+</sup> calcd. 1145.3617, found 1145.3617;  $\text{C}_{46}\text{H}_{61}\text{Au}^{35}\text{Cl}^{37}\text{ClN}_5^{195}\text{Pt}$  [M]<sup>+</sup> calcd. 1147.3588, found 1147.3580;  $\text{C}_{46}\text{H}_{61}\text{Au}^{37}\text{Cl}_2\text{N}_5^{195}\text{Pt}$  [M]<sup>+</sup> calcd. 1149.3558, found 1149.3533;  $\text{C}_{46}\text{H}_{61}\text{Au}^{35}\text{Cl}_2\text{N}_5^{196}\text{Pt}$  [M]<sup>+</sup> calcd. 1146.3619, found 1146.3641;  $\text{C}_{46}\text{H}_{61}\text{Au}^{35}\text{Cl}^{37}\text{ClN}_5^{196}\text{Pt}$  [M]<sup>+</sup> calcd. 1148.3589, found 1148.3605;  $\text{C}_{46}\text{H}_{61}\text{Au}^{37}\text{Cl}_2\text{N}_5^{196}\text{Pt}$  [M]<sup>+</sup> calcd. 1150.3560, found 1150.3610;  $\text{C}_{46}\text{H}_{61}\text{Au}^{35}\text{Cl}_2\text{N}_5^{198}\text{Pt}$  [M]<sup>+</sup> calcd. 1148.3648, found 1148.3605;  $\text{C}_{46}\text{H}_{61}\text{Au}^{35}\text{Cl}^{37}\text{ClN}_5^{198}\text{Pt}$  [M]<sup>+</sup> calcd. 1150.3619, found 1150.3560;  $\text{C}_{46}\text{H}_{61}\text{Au}^{37}\text{Cl}_2\text{N}_5^{198}\text{Pt}$  [M]<sup>+</sup> calcd. 1152.3589, found 1152.3576;

**EA** calcd. for  $\text{C}_{46}\text{H}_{61}\text{Cl}_3\text{AuN}_5\text{Pt}$ : C: 46.73, H: 5.20, N: 5.92; found C: 46.84, H: 5.41, N: 6.30.

### 2.2.22 Synthesis of Gold(I) Platinum(II) Complex 3d

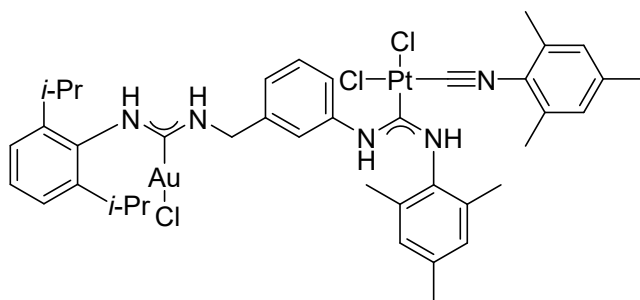

According to **GP6** the reaction was carried out with (((3-aminobenzyl)amino)((2,6-diisopropylphenyl)amino)methylene)gold(I) chloride (50.0 mg, 92.27  $\mu\text{mol}$ , 1.00 eq.) and bis(2,4,6-trimethylphenylisocyanide) platinum(II) chloride (51.34 mg, 92.27  $\mu\text{mol}$ , 1.00 eq.) Title compound was obtained as a colorless solid (82.0 mg, 74.66  $\mu\text{mol}$ , 81 % yield).

According to **GP7** the reaction was carried out with chloro(dimethyl sulfide)gold(I) (30 mg, 102  $\mu\text{mol}$ , 1.00 eq.), 2,6-diisopropylphenyl isocyanide (19.08 mg, 102  $\mu\text{mol}$ , 1.00 eq.), 3-aminobenzylamine (12.4 mg, 102  $\mu\text{mol}$ , 1.00 eq.) and bis(2,4,6-trimethylphenyl) platinum(II)

chloride (56.67 mg, 102  $\mu\text{mol}$ , 1.00 eq.). Title compound was obtained as a colorless solid (71.0 mg, 64.65  $\mu\text{mol}$ , 63 %).

Mixture of two rotamers: A (48%), B (52 %).

**m.p.** = 189 – 204 °C;

**$^1\text{H NMR}$**  (400 MHz,  $\text{CD}_2\text{Cl}_2$ , 295 K)  $\delta$  [ppm] = 8.93 – 8.75 (m, 1H, Rotamer A,  $\text{NH}$ ), 8.66 (m, 1H, Rotamer B,  $\text{NH}$ ), 8.38 – 8.14 (m, 1H, Rotamer B,  $\text{NH}$ ), 8.04 (m, 1H, Rotamer A,  $\text{NH}$ ), 7.88 – 7.55 (m, 2H, Rotamers A and B,  $2\times\text{NH}$ ), 7.44 – 7.30 (m, 2H, Rotamers A and B,  $2\times\text{C}_{\text{Ar}}\text{H}$ ), 7.25 – 7.12 (m, 3H, Rotamers A and B,  $3\times\text{C}_{\text{Ar}}\text{H}$ ), 7.05 – 6.95 (m, 2H, Rotamers A and B,  $2\times\text{C}_{\text{Ar}}\text{H}$ ), 6.90 – 6.82 (m, 2H, Rotamers A and B,  $2\times\text{C}_{\text{Ar}}\text{H}$ ), 6.58 (s, 1H, Rotamer B,  $\text{C}_{\text{Ar}}\text{H}$ ), 6.56 (s, 1H, Rotamer A,  $\text{C}_{\text{Ar}}\text{H}$ ), 6.23 (t,  $J = 6.2$  Hz, 1H, Rotamer B,  $\text{C}_{\text{Ar}}\text{H}$ ), 6.14 (t,  $J = 5.8$  Hz, 1H, Rotamer A), 5.09 – 4.83 (m, 2H, Rotamer A,  $-\text{CH}_2-$ ), 4.78 – 4.56 (m, 2H, Rotamer B,  $-\text{CH}_2-$ ), 3.32 – 2.92 (m, 2H, Rotamers A and B,  $2\times\text{CH}(\text{CH}_3)_2$ ), 2.43 (s, 3H, Rotamer A,  $-\text{CH}_3$ ), 2.40 – 2.29 (m, 18H, Rotamer B,  $6\times\text{C}_{\text{H}_3}$ ), 2.27 – 2.23 (m, 3H, Rotamer B,  $-\text{CH}_3$ ), 2.12 (s, 3H, Rotamer B,  $-\text{CH}_3$ ), 2.08 (s, 3H, Rotamer B,  $-\text{CH}_3$ ); 1.30 (d,  $J = 6.9$  Hz, 6H, Rotamer B,  $2\times\text{CH}_3$ ), 1.18 (d,  $J = 6.9$  Hz, 6H, Rotamer B,  $2\times\text{CH}_3$ ); 1.12 (d,  $J = 6.9$  Hz, 6H, Rotamer A,  $2\times\text{CH}_3$ ), 1.02 (d,  $J = 6.9$  Hz, 3H, Rotamer A,  $-\text{CH}_3$ ), 1.00 (d,  $J = 6.9$  Hz, 3H, Rotamer A,  $-\text{CH}_3$ );

**$^{13}\text{C NMR}$**  (101 MHz,  $\text{CD}_2\text{Cl}_2$ , 295 K)  $\delta$  [ppm] = 192.49 (s, Rotamer B, 1C,  $\text{C}_{\text{Carbene}}$ ), 191.65 (s, Rotamer A, 1C,  $\text{C}_{\text{Carbene}}$ ), 169.27 (s, Rotamer A, 1C,  $\text{C}_{\text{Carbene}}$ ), 168.79 (s, Rotamer B, 1C,  $\text{C}_{\text{Carbene}}$ ), 147.67 (s, 1C, Rotamer A,  $\text{C}_{\text{Ar}}$ ), 147.51 (s, 1C, Rotamer B,  $\text{C}_{\text{Ar}}$ ), 146.91 (s, 1C, Rotamer A,  $\text{C}_{\text{Ar}}$ ), 146.72 (s, 1C, Rotamer B,  $\text{C}_{\text{Ar}}$ ); 141.84 (s, 1C, Rotamer A,  $\text{C}_{\text{Ar}}$ ), 140.80 (s, 1C, Rotamer A,  $\text{C}_{\text{Ar}}$ ), 140.61 (s, 1C, Rotamer B,  $\text{C}_{\text{Ar}}$ ), 140.58 (s, 1C, Rotamer B,  $\text{C}_{\text{Ar}}$ ), 140.43 (s, 1C, Rotamer A,  $\text{C}_{\text{Ar}}$ ), 140.38 (s, 1C, Rotamer B,  $\text{C}_{\text{Ar}}$ ), 139.91 (s, 1C, Rotamer B,  $\text{C}_{\text{Ar}}$ ), 138.70 (s, 1C, Rotamer A,  $\text{C}_{\text{Ar}}$ ), 138.15 (s, 1C, Rotamer A,  $\text{C}_{\text{Ar}}$ ), 138.06 (s, 1C, Rotamer B,  $\text{C}_{\text{Ar}}$ ), 136.34 (s, 2C, Rotamer A,  $2\times\text{C}_{\text{Ar}}$ ), 136.28 (s, 2C, Rotamer B,  $2\times\text{C}_{\text{Ar}}$ ), 135.54 (s, 1C, Rotamer A,  $\text{C}_{\text{Ar}}$ ), 135.44 (s, 1C, Rotamer A,  $\text{C}_{\text{Ar}}$ ), 135.25 (s, 1C, Rotamer B,  $\text{C}_{\text{Ar}}$ ), 130.88 (s, 1C, Rotamer A,  $\text{C}_{\text{Ar}}$ ), 130.78 (d, 1C, Rotamer B,  $\text{C}_{\text{Ar}}\text{H}$ ), 130.62 (s, 1C, Rotamer B,  $\text{C}_{\text{Ar}}$ ), 130.56 (d, 1C, Rotamer A,  $\text{C}_{\text{Ar}}\text{H}$ ), 130.14 (d, 1C, Rotamer A,  $\text{C}_{\text{Ar}}\text{H}$ ), 130.07 (s, 1C, Rotamer B,  $\text{C}_{\text{Ar}}$ ), 129.85 (s, 1C, Rotamer A,  $\text{C}_{\text{Ar}}$ ), 129.81 (s, 1C, Rotamer A,  $\text{C}_{\text{Ar}}$ ), 129.65 (s, 1C, Rotamer B,  $\text{C}_{\text{Ar}}$ ), 129.62 (s, 1C, Rotamer B,  $\text{C}_{\text{Ar}}$ ), 129.41 (d, 1C, Rotamer A,  $\text{C}_{\text{Ar}}\text{H}$ ), 129.17 (d, 1C, Rotamer A,  $\text{C}_{\text{Ar}}\text{H}$ ), 129.13 (d, 1C, Rotamer B,  $\text{C}_{\text{Ar}}\text{H}$ ), 129.07 (d, 1C, Rotamer B,  $\text{C}_{\text{Ar}}\text{H}$ ), 129.02 (d, 1C, Rotamer A,  $\text{C}_{\text{Ar}}\text{H}$ ), 127.26 (d, 1C, Rotamer B,  $\text{C}_{\text{Ar}}\text{H}$ ), 126.81 (d, 1C, Rotamer A,  $\text{C}_{\text{Ar}}\text{H}$ ), 126.54 (d, 1C, Rotamer A,  $\text{C}_{\text{Ar}}\text{H}$ ), 125.34 (d, 1C, Rotamer B,  $\text{C}_{\text{Ar}}\text{H}$ ), 125.26 (d, 2C, Rotamer A,  $2\times\text{C}_{\text{Ar}}\text{H}$ ),



125.21 (d, 2C, Rotamer B, 2x $\underline{C_{Ar}H}$ ), 124.36 (d, 1C, Rotamer A,  $\underline{C_{Ar}H}$ ), 124.01 (d, 1C, Rotamer B,  $\underline{C_{Ar}H}$ ), 122.82 (d, 1C, Rotamer A,  $\underline{C_{Ar}H}$ ), 117.54 (d, 1C, Rotamer A,  $\underline{C_{Ar}H}$ ), 114.95 (d, 1C, Rotamer B,  $\underline{C_{Ar}H}$ ), 114.12 (d, 1C, Rotamer B,  $\underline{C_{Ar}H}$ ), 53.71 (t, 1C, Rotamer A,  $-\underline{CH_2}-$ ), 52.97 (t, 1C, Rotamer B,  $-\underline{CH_2}-$ ), 29.15 (d, 1C, Rotamer A,  $-\underline{CH}(\text{CH}_3)_2$ ), 29.10 (d, 1C, Rotamer A,  $-\underline{CH}(\text{CH}_3)_2$ ), 28.52 (d, 2C, Rotamer B,  $-\underline{CH}(\text{CH}_3)_2$ ), 24.77 (q, 2C, Rotamer A, 2x- $\underline{CH_3}$ ), 24.14 (q, 2C, Rotamer B, 2x- $\underline{CH_3}$ ), 23.76 (q, 2C, Rotamer B, 2x- $\underline{CH_3}$ ), 23.15 (q, 2C, Rotamer A, 2x- $\underline{CH_3}$ ), 21.23 (q, 2C, Rotamer B, 2x- $\text{CH}_3$ ), 21.21 (q, 2C, Rotamer A, 2x- $\text{CH}_3$ ), 18.75 (q, 2C, Rotamer A, 2x- $\text{CH}_3$ ), 18.69 (q, 2C, Rotamer B, 2x- $\text{CH}_3$ ), 18.43 (q, 2C, Rotamer A, 2x- $\text{CH}_3$ ), 18.38 (q, 2C, Rotamer B, 2x- $\text{CH}_3$ ).

$^{195}\text{Pt}$  NMR (86 MHz,  $\text{CD}_2\text{Cl}_2$ , 295 K)  $\delta$  [ppm] = -3496.53 (s, 1Pt, Rotamer A or B), -3527.06 (s, 1Pt, Rotamer A or B);

IR (ATR)  $\tilde{\nu}$  [ $\text{cm}^{-1}$ ] = 3221 (w), 2962 (w), 2923 (w), 2865 (w), 2187 (s), 1594 (w), 1543 (s), 1382 (w), 1308 (w), 1218 (w), 1057 (w), 936 (w), 854 (w), 807 (m), 783 (m), 712 (w), 669 (w);

HR-MS (MALDI):  $\text{C}_{40}\text{H}_{49}\text{Au}^{35}\text{Cl}_2\text{N}_5^{192}\text{Pt}$  [M-Cl] $^+$  calcd. 1058.2641, found 1058.2647;  $\text{C}_{40}\text{H}_{49}\text{Au}^{35}\text{Cl}^{37}\text{ClN}_5^{192}\text{Pt}$  [M-Cl] $^+$  calcd. 1060.2611, found 1060.2662;  $\text{C}_{40}\text{H}_{49}\text{Au}^{37}\text{Cl}_2\text{N}_5^{192}\text{Pt}$  [M-Cl] $^+$  calcd. 1062.2582, found 1062.2681;  $\text{C}_{40}\text{H}_{49}\text{Au}^{35}\text{Cl}_2\text{N}_5^{194}\text{Pt}$  [M-Cl] $^+$  calcd. 1060.2657, found 1060.2662;  $\text{C}_{40}\text{H}_{49}\text{Au}^{35}\text{Cl}^{37}\text{ClN}_5^{194}\text{Pt}$  [M-Cl] $^+$  calcd. 1062.2628, found 1062.2681;  $\text{C}_{40}\text{H}_{49}\text{Au}^{37}\text{Cl}_2\text{N}_5^{194}\text{Pt}$  [M-Cl] $^+$  calcd. 1064.2598, found 1064.2681;  $\text{C}_{40}\text{H}_{49}\text{Au}^{35}\text{Cl}_2\text{N}_5^{195}\text{Pt}$  [M-Cl] $^+$  calcd. 1061.2678, found 1061.2688;  $\text{C}_{40}\text{H}_{49}\text{Au}^{35}\text{Cl}^{37}\text{ClN}_5^{195}\text{Pt}$  [M-Cl] $^+$  calcd. 1063.2649, found 1063.2681;  $\text{C}_{40}\text{H}_{49}\text{Au}^{37}\text{Cl}_2\text{N}_5^{195}\text{Pt}$  [M-Cl] $^+$  calcd. 1065.2619, found 1065.2691;  $\text{C}_{40}\text{H}_{49}\text{Au}^{35}\text{Cl}_2\text{N}_5^{196}\text{Pt}$  [M-Cl] $^+$  calcd. 1062.2680, found 1062.2681;  $\text{C}_{40}\text{H}_{49}\text{Au}^{35}\text{Cl}^{37}\text{ClN}_5^{196}\text{Pt}$  [M-Cl] $^+$  calcd. 1064.2650, found 1064.2681;  $\text{C}_{40}\text{H}_{49}\text{Au}^{37}\text{Cl}_2\text{N}_5^{196}\text{Pt}$  [M-Cl] $^+$  calcd. 1066.2621, found 1066.2682;  $\text{C}_{40}\text{H}_{49}\text{Au}^{35}\text{Cl}_2\text{N}_5^{198}\text{Pt}$  [M-Cl] $^+$  calcd. 1064.2709, found 1064.2681;  $\text{C}_{40}\text{H}_{49}\text{Au}^{35}\text{Cl}^{37}\text{ClN}_5^{198}\text{Pt}$  [M-Cl] $^+$  calcd. 1066.2680, found 1066.2682;  $\text{C}_{40}\text{H}_{49}\text{Au}^{37}\text{Cl}_2\text{N}_5^{198}\text{Pt}$  [M-Cl] $^+$  calcd. 1068.2650, found 1068.2703;

EA calcd. for  $\text{C}_{40}\text{H}_{49}\text{Cl}_3\text{AuN}_5\text{Pt}$ : C: 43.75, H: 4.50, N: 6.38; found C: 43.52, H: 4.68, N: 6.23.

## 2.2.23 Synthesis of Gold(I) Platinum(II) Complex 3e

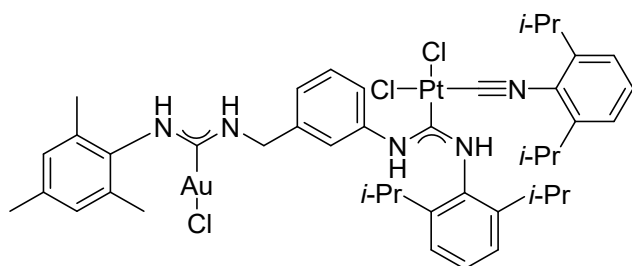

According to **GP6** the reaction was carried out with (((4-aminobenzyl)amino)((2,4,6-trimethylphenyl)amino)methylene)gold(I) chloride (50.0 mg, 100.04  $\mu\text{mol}$ , 1.00 eq.) and bis(2,6-diisopropylphenylisonitrile) platinum(II) chloride (64.08 mg, 100.04  $\mu\text{mol}$ , 1.00 eq.) Title compound was obtained as a colorless solid (92.0 mg, 80.68  $\mu\text{mol}$ , 81 % yield).

According to **GP7** the reaction was carried out with chloro(dimethyl sulfide)gold(I) (30 mg, 102  $\mu\text{mol}$ , 1.00 eq.), 2,4,6-trimethylphenyl isocyanide (14.79 mg, 102  $\mu\text{mol}$ , 1.00 eq.), 3-aminobenzylamine (12.4 mg, 102  $\mu\text{mol}$ , 1.00 eq.) and bis(2,6-diisopropylphenyl) platinum(II) chloride (65.2 mg, 102  $\mu\text{mol}$ , 1.00 eq.). Title compound was obtained as a colorless solid (87.0 mg, 73.6  $\mu\text{mol}$ , 75 %).

Mixture of two rotamers: A (71 %), B (29 %).

**m.p.** = 244 – 249 °C;

**$^1\text{H}$  NMR** (600 MHz,  $\text{CD}_2\text{Cl}_2$ , 295 K)  $\delta$  [ppm] = 9.27 – 9.00 (m, 1H, Rotamer A,  $\text{NH}$ ), 9.03 – 8.92 (m, 1H, Rotamer B,  $\text{NH}$ ), 8.66 (s, 1H, Rotamer B,  $\text{NH}$ ), 8.62 – 8.47 (m, 1H, Rotamer A,  $\text{NH}$ ), 8.34 – 8.05 (m, 2H, Rotamers A and B, 2x $\text{NH}$ ), 8.04 – 7.91 (m, 1H, Rotamers A and B,  $\text{C}_{\text{ArH}}$ ), 7.85 – 7.76 (m, 2H, Rotamers A and B,  $\text{C}_{\text{ArH}}$ ), 7.71 – 7.63 (m, 1H, Rotamers A and B,  $\text{C}_{\text{ArH}}$ ), 7.59 (d,  $J = 7.8$  Hz, 1H, Rotamers A and B,  $\text{C}_{\text{ArH}}$ ), 7.57 – 7.50 (m, 1H, Rotamers A and B,  $\text{C}_{\text{ArH}}$ ), 7.49 – 7.44 (m, 1H, Rotamers A and B,  $\text{C}_{\text{ArH}}$ ), 7.44 – 7.37 (m, 1H, Rotamers A and B,  $\text{C}_{\text{ArH}}$ ), 7.29 – 7.25 (m, 1H, Rotamers A and B,  $\text{C}_{\text{ArH}}$ ), 7.24 – 7.20 (m, 1H, Rotamer A,  $\text{C}_{\text{ArH}}$ ), 7.18 – 7.15 (m, 1H, Rotamer B,  $\text{C}_{\text{ArH}}$ ), 6.91 – 6.90 (m, 1H, Rotamer B,  $\text{C}_{\text{ArH}}$ ), 6.89 – 6.88 (m, 1H, Rotamer A,  $\text{C}_{\text{ArH}}$ ), 6.59 (dt,  $J = 12.4, 6.3$  Hz, 1H, Rotamer A,  $\text{C}_{\text{ArH}}$ ), 6.51 (t,  $J = 6.1$  Hz, 1H, Rotamer B,  $\text{C}_{\text{ArH}}$ ), 5.26 – 5.14 (m, 2H, Rotamer B,  $-\text{CH}_2-$ ), 5.11 – 4.88 (m, 2H, Rotamer A,  $-\text{CH}_2-$ ), 3.81 – 3.57 (m, 4H, Rotamer A, 4x- $\text{CH}(\text{CH}_3)_3$ ), 3.33 – 3.17 (m, 4H, Rotamer B, 4x- $\text{CH}(\text{CH}_3)_3$ ), 2.64 (s, 3H, Rotamer B,  $-\text{CH}_3$ ), 2.60 – 2.56 (m, 3H, Rotamer A,  $-\text{CH}_3$ ), 2.50 (s, 3H, Rotamer A,  $-\text{CH}_3$ ), 2.50 – 2.48 (m, 3H, Rotamer A,  $-\text{CH}_3$ ), 2.45 (s, 6H, Rotamer B, 2x- $\text{CH}_3$ ), 1.62 (d,  $J = 6.9$  Hz, 18H, Rotamer A, 6x- $\text{CH}_3$ ), 1.57 (dd,  $J = 6.9, 2.5$  Hz, 3H, Rotamer B,

-CH<sub>3</sub>), 1.54 (dd,  $J = 6.9, 1.8$  Hz, 12H, Rotamer B, 4x-CH<sub>3</sub>), 1.52 – 1.49 (m, 3H, Rotamer B, -CH<sub>3</sub>), 1.49 – 1.47 (m, 6H, Rotamer B, 2x-CH<sub>3</sub>), 1.45 (d,  $J = 6.7$  Hz, 6H, Rotamer A, 2x-CH<sub>3</sub>);

<sup>13</sup>C NMR (151 MHz, CD<sub>2</sub>Cl<sub>2</sub>, 295 K)  $\delta$  [ppm] = 196.73 (s, 1C, Rotamer A, C<sub>Carbene</sub>), 190.97 (s, 1C, Rotamer B, C<sub>Carbene</sub>), 161.52 (s, 1C, Rotamer A, C<sub>Carbene</sub>), 159.26 (s, 1C, Rotamer B, C<sub>Carbene</sub>), 147.57 (s, 1C, Rotamer A, C<sub>Ar</sub>), 147.02 (s, 1C, Rotamer A, C<sub>Ar</sub>), 146.62 (s, 1C, Rotamer A, C<sub>Ar</sub>), 145.92 (s, 1C, Rotamer B, C<sub>Ar</sub>), 145.86 (s, 1C, Rotamer B, C<sub>Ar</sub>), 145.82 (s, 1C, Rotamer B, C<sub>Ar</sub>), 140.23 (s, 1C, Rotamer B, C<sub>Ar</sub>), 139.98 (s, 1C, Rotamer A, C<sub>Ar</sub>), 139.92 (s, 1C, Rotamer B, C<sub>Ar</sub>), 139.86 (s, 1C, Rotamer A, C<sub>Ar</sub>), 139.69 (s, 1C, Rotamer B, C<sub>Ar</sub>), 139.28 (s, 1C, Rotamer A, C<sub>Ar</sub>), 138.66 (s, 1C, Rotamer B, C<sub>Ar</sub>), 138.57 (s, 1C, Rotamer B, C<sub>Ar</sub>), 138.47 (s, 1C, Rotamer A, C<sub>Ar</sub>), 138.42 (s, 1C, Rotamer A, C<sub>Ar</sub>), 138.15 (s, 1C, Rotamer A, C<sub>Ar</sub>), 137.64 (s, 1C, Rotamer B, C<sub>Ar</sub>), 136.64 (s, 1C, Rotamer A, C<sub>Ar</sub>), 136.15 (s, 1C, Rotamer B, C<sub>Ar</sub>), 136.05 (s, 1C, Rotamer A, C<sub>Ar</sub>), 136.00 (s, 1C, Rotamer B, C<sub>Ar</sub>), 135.94 (s, 1C, Rotamer A, C<sub>Ar</sub>), 135.48 (s, 1C, Rotamer B, C<sub>Ar</sub>), 131.67 (s, 1C, Rotamer A, C<sub>ArH</sub>), 131.20 (s, 1C, Rotamer B, C<sub>ArH</sub>), 130.69 (d, 1C, Rotamer A, C<sub>ArH</sub>), 130.63 (d, 1C, Rotamer B, C<sub>ArH</sub>), 130.32 (d, 1C, Rotamer B, C<sub>ArH</sub>), 130.22 (d, 1C, Rotamer B, C<sub>ArH</sub>), 130.01 (d, 1C, Rotamer A, C<sub>ArH</sub>), 129.94 (d, 1C, Rotamer B, C<sub>ArH</sub>), 129.24 (d, 1C, Rotamer A, C<sub>ArH</sub>), 127.14 (d, 1C, Rotamer A, C<sub>ArH</sub>), 126.17 (d, 1C, Rotamer B, C<sub>ArH</sub>), 126.01 (d, 1C, Rotamer A, C<sub>ArH</sub>), 125.78 (d, 1C, Rotamer B, C<sub>ArH</sub>), 125.59 (d, 1C, Rotamer A, C<sub>ArH</sub>), 125.53 (d, 1C, Rotamer A, C<sub>ArH</sub>), 124.86 (d, 1C, Rotamer B, C<sub>ArH</sub>), 124.35 (d, 1C, Rotamer B, C<sub>ArH</sub>), 124.25 (d, 1C, Rotamer A, C<sub>ArH</sub>), 123.94 (d, 1C, Rotamer A, C<sub>ArH</sub>), 123.85 (d, 1C, Rotamer B, C<sub>ArH</sub>), 122.29 (d, 1C, Rotamer B, C<sub>ArH</sub>), 120.89 (d, 1C, Rotamer B, C<sub>ArH</sub>), 120.29 (d, 1C, Rotamer B, C<sub>ArH</sub>), 117.26 (d, 1C, Rotamer A, C<sub>ArH</sub>), 114.76 (d, C, Rotamer A, C<sub>ArH</sub>), 113.92 (d, 1C, Rotamer A, C<sub>ArH</sub>), 53.93 (t, Rotamer B, -CH<sub>2</sub>-), 52.68 (t, Rotamer A, -CH<sub>2</sub>-), 30.43 (d, 1C, Rotamer A, -CH(CH<sub>3</sub>)<sub>2</sub>), 30.31 (d, 2C, Rotamer A, 2x-CH(CH<sub>3</sub>)<sub>2</sub>), 29.94 (d, 1C, Rotamer B, -CH(CH<sub>3</sub>)<sub>2</sub>), 29.89 (d, 1C, Rotamer B, -CH(CH<sub>3</sub>)<sub>2</sub>), 29.86 (d, 1C, Rotamer B, -CH(CH<sub>3</sub>)<sub>2</sub>), 29.02 (d, 1C, Rotamer B, -CH(CH<sub>3</sub>)<sub>2</sub>), 28.98 (d, 1C, Rotamer A, -CH(CH<sub>3</sub>)<sub>2</sub>), 30.43 (q, 1C, Rotamer B, -CH<sub>3</sub>), 30.31 (q, 1C, Rotamer A, -CH<sub>3</sub>), 29.94 (q, 1C, Rotamer B, -CH<sub>3</sub>), 29.89 (q, 1C, Rotamer B, -CH<sub>3</sub>), 29.86 (q, 1C, Rotamer B, -CH<sub>3</sub>), 29.02 (q, 1C, Rotamer B, -CH<sub>3</sub>), 28.98 (q, 1C, Rotamer A, -CH<sub>3</sub>), 28.89 (q, 1C, Rotamer B, -CH<sub>3</sub>), 24.58 (q, 1C, Rotamer A, -CH<sub>3</sub>), 23.71 (q, 1C, Rotamer B, -CH<sub>3</sub>), 23.63 (q, 1C, Rotamer A, -CH<sub>3</sub>), 23.60 (q, 1C, Rotamer B, -CH<sub>3</sub>), 22.91 (q, 2C, Rotamer A, 2x-CH<sub>3</sub>), 22.80 (q, 2C, Rotamer A, 2x-CH<sub>3</sub>), 21.22 (q, Rotamer B, -CH<sub>3</sub>), 21.14 (q, Rotamer B, -CH<sub>3</sub>), 21.10 (q, Rotamer B, -CH<sub>3</sub>), 19.03 (q, Rotamer A, -CH<sub>3</sub>), 18.34 (q, Rotamer A, -CH<sub>3</sub>), 18.29 (q, Rotamer A, -CH<sub>3</sub>);

$^{195}\text{Pt}$  NMR (86 MHz,  $\text{CD}_2\text{Cl}_2$ , 295 K)  $\delta$  [ppm] = -3501.04 (s, 1Pt, Rotamer A or B), -3527.05 (s, 1Pt, Rotamer A or B);

IR (ATR)  $\tilde{\nu}$  [ $\text{cm}^{-1}$ ] = 3242 (m), 2964 (s), 2872 (m), 2188 (w), 1718 (s), 1660 (w), 1608 (w), 1551 (s), 1488 (w), 1460 (w), 1385 (w), 1365 (w), 1315 (w), 1183 (w), 1062 (m), 1035 (m), 954 (w), 855 (w), 801 (w), 750 (w), 695 (w);

HR-MS (ESI (+)):  $\text{C}_{43}\text{H}_{55}\text{Au}^{35}\text{Cl}_2\text{N}_5^{192}\text{Pt}$  [M-Cl] $^+$  calcd. 1100.3110, found 1100.3116;  $\text{C}_{43}\text{H}_{55}\text{Au}^{35}\text{Cl}^{37}\text{ClN}_5^{192}\text{Pt}$  [M-Cl] $^+$  calcd. 1102.3081, found 1102.3139;  $\text{C}_{43}\text{H}_{55}\text{Au}^{37}\text{Cl}_2\text{N}_5^{192}\text{Pt}$  [M-Cl] $^+$  calcd. 1104.3051, found 1104.3158;  $\text{C}_{43}\text{H}_{55}\text{Au}^{35}\text{Cl}_2\text{N}_5^{194}\text{Pt}$  [M-Cl] $^+$  calcd. 1102.3127, found 1102.3139;  $\text{C}_{43}\text{H}_{55}\text{Au}^{35}\text{Cl}^{37}\text{ClN}_5^{194}\text{Pt}$  [M-Cl] $^+$  calcd. 1104.3097, found 1104.3158;  $\text{C}_{43}\text{H}_{55}\text{Au}^{37}\text{Cl}_2\text{N}_5^{194}\text{Pt}$  [M-Cl] $^+$  calcd. 1106.3068, found 1106.3159;  $\text{C}_{43}\text{H}_{55}\text{Au}^{35}\text{Cl}_2\text{N}_5^{195}\text{Pt}$  [M-Cl] $^+$  calcd. 1103.3148, found 1103.3165;  $\text{C}_{43}\text{H}_{55}\text{Au}^{35}\text{Cl}^{37}\text{ClN}_5^{195}\text{Pt}$  [M-Cl] $^+$  calcd. 1105.3118, found 1105.3160;  $\text{C}_{43}\text{H}_{55}\text{Au}^{37}\text{Cl}_2\text{N}_5^{195}\text{Pt}$  [M-Cl] $^+$  calcd. 1107.3089, found 1107.3169;  $\text{C}_{43}\text{H}_{55}\text{Au}^{35}\text{Cl}_2\text{N}_5^{196}\text{Pt}$  [M-Cl] $^+$  calcd. 1104.3149, found 1104.3158;  $\text{C}_{43}\text{H}_{55}\text{Au}^{35}\text{Cl}^{37}\text{ClN}_5^{196}\text{Pt}$  [M-Cl] $^+$  calcd. 1106.3120, found 1106.3159;  $\text{C}_{43}\text{H}_{55}\text{Au}^{37}\text{Cl}_2\text{N}_5^{196}\text{Pt}$  [M-Cl] $^+$  calcd. 1108.3090, found 1108.3162;  $\text{C}_{43}\text{H}_{55}\text{Au}^{35}\text{Cl}_2\text{N}_5^{198}\text{Pt}$  [M-Cl] $^+$  calcd. 1106.3179, found 1106.3159;  $\text{C}_{43}\text{H}_{55}\text{Au}^{35}\text{Cl}^{37}\text{ClN}_5^{198}\text{Pt}$  [M-Cl] $^+$  calcd. 1108.3149, found 1108.3090;  $\text{C}_{43}\text{H}_{55}\text{Au}^{37}\text{Cl}_2\text{N}_5^{198}\text{Pt}$  [M-Cl] $^+$  calcd. 1110.3120, found 1110.3183;

EA calcd. for  $\text{C}_{43}\text{H}_{55}\text{Cl}_3\text{AuN}_5\text{Pt}$ : C: 45.29, H: 4.86, N: 6.14; found C: 45.57, H: 5.00, N: 6.31.

### 2.2.24 Synthesis of Gold(I) Platinum(II) Complex 3f

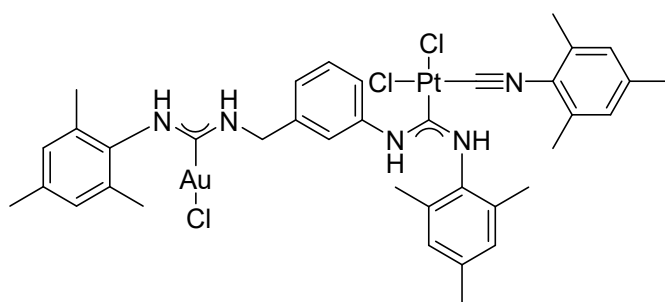

According to **GP6** the reaction was carried out with (((4-aminobenzyl)amino)(2,4,6-trimethylphenylamino)methylene)gold(I) chloride (50.0 mg, 100.04  $\mu\text{mol}$ , 1.00 eq.) and bis(2,4,6-trimethylphenylisocyanide) platinum(II) chloride (55.66 mg, 100.04  $\mu\text{mol}$ , 1.00 eq.) Title compound was obtained as a colorless solid (79.0 mg, 71.93  $\mu\text{mol}$ , 72 % yield).

Mixture of two rotamers: A (53 %), B (47 %).

**m.p.** = 279 – 284 °C;

**<sup>1</sup>H NMR** (400 MHz, CD<sub>2</sub>Cl<sub>2</sub>, 295 K) δ [ppm] = 9.51 (s, 1H, Rotamer B, NH), 8.86 – 8.70 (m, 1H, Rotamer A, NH), 8.41 – 7.85 (m, 1H, Rotamers A and B, NH), 7.75 – 7.49 (m, 2H, Rotamers A and B, 2xNH), 7.38 – 7.16 (m, 2H, Rotamers A and B, 2xC<sub>Ar</sub>H), 7.03 – 6.94 (m, 2H, Rotamers A and B, 2xC<sub>Ar</sub>H), 6.94 – 6.85 (m, 3H, Rotamers A and B, 3xC<sub>Ar</sub>H), 6.84 – 6.79 (m, 2H, Rotamers A and B, 2xC<sub>Ar</sub>H), 6.61 – 6.52 (m, 1H, Rotamers A and B, 2xC<sub>Ar</sub>H), 6.31 – 6.13 (m, 1H, Rotamers A and B, C<sub>Ar</sub>H), 4.98 – 4.91 (m, 2H, Rotamer A, -CH<sub>2</sub>-), 4.77 – 4.52 (m, 2H, Rotamer B, -CH<sub>2</sub>-); 2.42 (s, 3H, Rotamer B, -CH<sub>3</sub>), 2.36 – 2.34 (m, 3H, Rotamer A, -CH<sub>3</sub>), 2.33 (s, 3H, Rotamer A, -CH<sub>3</sub>), 2.32 (s, 3H, Rotamer B, -CH<sub>3</sub>), 2.31 (s, 3H, Rotamer B, -CH<sub>3</sub>), 2.30 (s, 6H, Rotamer B, 2x-CH<sub>3</sub>), 2.26 (s, 3H, Rotamer B, -CH<sub>3</sub>), 2.24 (s, 3H, Rotamer B, -CH<sub>3</sub>), 2.17 (s, 3H, Rotamer A, -CH<sub>3</sub>), 2.12 (s, 12H, Rotamer A, 4x-CH<sub>3</sub>), 2.10 (s, 6H, Rotamer A, 2x-CH<sub>3</sub>), 2.06 (s, 6H, Rotamer A, 2x-CH<sub>3</sub>).

**<sup>13</sup>C NMR** (101 MHz, CD<sub>2</sub>Cl<sub>2</sub>, 295 K) δ [ppm] = 196.41 (s, 1C, Rotamer A, C<sub>Carbene</sub>), 191.94 (s, 1C, Rotamer B, C<sub>Carbene</sub>), 168.90 (s, 1C, Rotamer B, C<sub>Carbene</sub>), 168.10 (s, 1C, Rotamer A, C<sub>Carbene</sub>), 141.82 (s, 1C, Rotamer A, C<sub>Ar</sub>), 140.72 (s, 1C, Rotamer A, C<sub>Ar</sub>), 140.67 (s, 1C, Rotamer B, C<sub>Ar</sub>), 140.56 (s, 1C, Rotamer B, C<sub>Ar</sub>), 140.33 (s, 1C, Rotamer B, C<sub>Ar</sub>), 140.24 (s, 1C, Rotamer B, C<sub>Ar</sub>), 140.11 (s, 1C, Rotamer A, C<sub>Ar</sub>), 139.96 (s, 1C, Rotamer A, C<sub>Ar</sub>), 139.93 (s, 1C, Rotamer A, C<sub>Ar</sub>), 139.84 (s, 1C, Rotamer B, C<sub>Ar</sub>), 139.19 (s, 1C, Rotamer B, C<sub>Ar</sub>), 138.22 (s, 1C, Rotamer A, C<sub>Ar</sub>), 137.95 (s, 1C, Rotamer B, C<sub>Ar</sub>), 136.70 (s, 2C, Rotamer A, 2xC<sub>Ar</sub>), 136.34 (s, 2C, Rotamer B, 2xC<sub>Ar</sub>), 136.30 (s, 1C, Rotamer A, C<sub>Ar</sub>), 136.26 (s, 1C, Rotamer A, C<sub>Ar</sub>), 136.23 (s, 2C, Rotamer B, C<sub>Ar</sub>), 136.07 (s, 2C, Rotamer B, 2xC<sub>Ar</sub>), 136.02 (s, 1C, Rotamer A, C<sub>Ar</sub>), 135.99 (s, 2C, Rotamer B, 2xC<sub>Ar</sub>), 135.58 (s, 2C, Rotamer A, 2xC<sub>Ar</sub>), 135.49 (s, 2C, Rotamer A, 2xC<sub>Ar</sub>), 130.51 (d, 1C, Rotamer A, C<sub>Ar</sub>H), 130.45 (d, 1C, Rotamer A, C<sub>Ar</sub>H), 130.35 (d, 1C, Rotamer A, C<sub>Ar</sub>H), 130.28 (d, 1C, Rotamer B, C<sub>Ar</sub>H), 130.25 (d, 1C, Rotamer B, C<sub>Ar</sub>H), 130.04 (d, 1C, Rotamer B, C<sub>Ar</sub>H), 129.96 (d, 1C, Rotamer B, C<sub>Ar</sub>H), 129.73 (s, 129.69 (d, 1C, Rotamer B, C<sub>Ar</sub>H), 129.39 (d, 1C, Rotamer A, C<sub>Ar</sub>H), 129.24 (d, 1C, Rotamer A, C<sub>Ar</sub>H), 129.03 (d, 1C, Rotamer A, C<sub>Ar</sub>H), 127.11 (d, 1C, Rotamer A, C<sub>Ar</sub>H), 126.92 (d, 1C, Rotamer A, C<sub>Ar</sub>H), 126.13 (d, 1C, Rotamer B, C<sub>Ar</sub>H), 125.81 (d, 1C, Rotamer B, C<sub>Ar</sub>H), 124.36 (d, 1C, Rotamer A, C<sub>Ar</sub>H), 123.09 (s, Rotamer A, C<sub>Ar</sub>), 123.82 (s, Rotamer B, C<sub>Ar</sub>), 122.96 (d, 1C, Rotamer A, C<sub>Ar</sub>H), 117.32 (d, 1C, Rotamer B, C<sub>Ar</sub>H), 114.83 (d, 1C, Rotamer B, C<sub>Ar</sub>H), 114.03 (d, 1C, Rotamer B, C<sub>Ar</sub>H), 53.99 (t, 1C, Rotamer B, -CH<sub>2</sub>-), 52.69 (t, Rotamer A, -CH<sub>2</sub>-), 21.54 (q, 1C, Rotamer B, -CH<sub>3</sub>), 21.42 (q, 1C, Rotamer A, -CH<sub>3</sub>), 21.30 (q, 1C, Rotamer A, -CH<sub>3</sub>), 21.26 (q, 1C, Rotamer A, -CH<sub>3</sub>), 21.24 (q, 1C, Rotamer B, -CH<sub>3</sub>), 21.15 (q, 1C, Rotamer B, -CH<sub>3</sub>),

19.01 (q, 2C, Rotamer B, 2x-CH<sub>3</sub>), 18.74 (q, 2C, Rotamer B, 2x-CH<sub>3</sub>), 18.68 (q, 2C, Rotamer A, 2x-CH<sub>3</sub>), 18.41 (q, 2C, Rotamer A, 2x-CH<sub>3</sub>), 18.38 (q, 2C, Rotamer A, 2x-CH<sub>3</sub>), 18.34 (q, 2C, Rotamer B, 2x-CH<sub>3</sub>);

<sup>195</sup>Pt NMR (86 MHz, CD<sub>2</sub>Cl<sub>2</sub>, 295 K) δ [ppm] = -3497.55 (s, 1Pt, Rotamer A or B), -3530.76 (s, 1Pt, Rotamer A or B);

IR (ATR)  $\tilde{\nu}$  [cm<sup>-1</sup>] = 3233 (w), 2917 (w), 2857 (w), 2189 (s), 1692 (w), 1546 (s), 1483 (m), 1379 (w), 1294 (w), 1142 (w), 1034 (w), 853 (m), 796 (w), 695 (m);

HR-MS (MALDI): C<sub>37</sub>H<sub>43</sub>Au<sup>35</sup>Cl<sub>2</sub>N<sub>5</sub><sup>192</sup>Pt [M-Cl]<sup>+</sup> calcd. 1016.2171, found 1016.2168; C<sub>37</sub>H<sub>43</sub>Au<sup>35</sup>Cl<sup>37</sup>ClN<sub>5</sub><sup>192</sup>Pt [M-Cl]<sup>+</sup> calcd. 1018.2142, found 1018.2184; C<sub>37</sub>H<sub>43</sub>Au<sup>37</sup>Cl<sub>2</sub>N<sub>5</sub><sup>192</sup>Pt [M-Cl]<sup>+</sup> calcd. 1020.2112, found 1020.2201; C<sub>37</sub>H<sub>43</sub>Au<sup>35</sup>Cl<sub>2</sub>N<sub>5</sub><sup>194</sup>Pt [M-Cl]<sup>+</sup> calcd. 1018.2188, found 1018.2184; C<sub>37</sub>H<sub>43</sub>Au<sup>35</sup>Cl<sup>37</sup>ClN<sub>5</sub><sup>194</sup>Pt [M-Cl]<sup>+</sup> calcd. 1020.2158, found 1020.2201; C<sub>37</sub>H<sub>43</sub>Au<sup>37</sup>Cl<sub>2</sub>N<sub>5</sub><sup>194</sup>Pt [M-Cl]<sup>+</sup> calcd. 1022.2129, found 1022.2202; C<sub>37</sub>H<sub>43</sub>Au<sup>35</sup>Cl<sub>2</sub>N<sub>5</sub><sup>195</sup>Pt [M-Cl]<sup>+</sup> calcd. 1019.2209, found 1019.2209; C<sub>37</sub>H<sub>43</sub>Au<sup>35</sup>Cl<sup>37</sup>ClN<sub>5</sub><sup>195</sup>Pt [M-Cl]<sup>+</sup> calcd. 1021.2179, found 1021.2202; C<sub>37</sub>H<sub>43</sub>Au<sup>37</sup>Cl<sub>2</sub>N<sub>5</sub><sup>195</sup>Pt [M-Cl]<sup>+</sup> calcd. 1023.2150, found 1023.2211; C<sub>37</sub>H<sub>43</sub>Au<sup>35</sup>Cl<sub>2</sub>N<sub>5</sub><sup>196</sup>Pt [M-Cl]<sup>+</sup> calcd. 1020.2210, found 1020.2201; C<sub>37</sub>H<sub>43</sub>Au<sup>35</sup>Cl<sup>37</sup>ClN<sub>5</sub><sup>196</sup>Pt [M-Cl]<sup>+</sup> calcd. 1022.2181, found 1022.2202; C<sub>37</sub>H<sub>43</sub>Au<sup>37</sup>Cl<sub>2</sub>N<sub>5</sub><sup>196</sup>Pt [M-Cl]<sup>+</sup> calcd. 1024.2151, found 1024.2203; C<sub>37</sub>H<sub>43</sub>Au<sup>35</sup>Cl<sub>2</sub>N<sub>5</sub><sup>198</sup>Pt [M-Cl]<sup>+</sup> calcd. 1022.2240, found 1022.2202; C<sub>37</sub>H<sub>43</sub>Au<sup>35</sup>Cl<sup>37</sup>ClN<sub>5</sub><sup>198</sup>Pt [M-Cl]<sup>+</sup> calcd. 1024.2210, found 1024.2203; C<sub>37</sub>H<sub>43</sub>Au<sup>37</sup>Cl<sub>2</sub>N<sub>5</sub><sup>198</sup>Pt [M-Cl]<sup>+</sup> calcd. 1026.2181, found 1026.2220;

EA calcd. for C<sub>37</sub>H<sub>43</sub>Cl<sub>3</sub>AuN<sub>5</sub>Pt: C: 42.08, H: 4.10, N: 6.63; found C: 42.43, H: 4.43, N: 6.59.

### 2.2.25 Synthesis of Gold(I) Platinum(II) Complex 3g

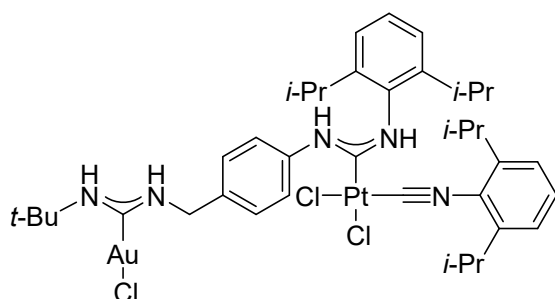

According to **GP6** the reaction was carried out with (((3-aminobenzyl)amino)(*tert*-butylamino)methylene)gold(I) chloride (50.0 mg, 114.23  $\mu$ mol, 1.00 eq.) and bis(2,6-

diisopropylphenylisocyanide) platinum(II) chloride (73.17 mg, 114.23  $\mu\text{mol}$ , 1.00 eq.) Title compound was obtained as a colorless solid (86.0 mg, 79.76  $\mu\text{mol}$ , 70 % yield).

According to **GP7** the reaction was carried out with chloro(dimethyl sulfide)gold(I) (30 mg, 102  $\mu\text{mol}$ , 1.00 eq.), *tert*-butyl isocyanide (8.47 mg, 102  $\mu\text{mol}$ , 1.00 eq.), 4-aminobenzylamine (12.4 mg, 102  $\mu\text{mol}$ , 1.00 eq.) and bis(2,6-diisopropylphenyl) platinum(II) chloride (65.2 mg, 102  $\mu\text{mol}$ , 1.00 eq.). Title compound was obtained as a colorless solid (74.0 mg, 68.63  $\mu\text{mol}$ , 67 %).

**m.p.** = 214 – 219 °C;

**$^1\text{H}$  NMR** (600 MHz, DMSO, 295 K)  $\delta$  [ppm] = 10.85 (s, 1H,  $\text{C}_{\text{Ar}}\text{H}$ ), 9.58 (s, 1H,  $\text{C}_{\text{Ar}}\text{H}$ ), 8.28 (s, 1H,  $\text{C}_{\text{Ar}}\text{H}$ ), 8.24 (t,  $J = 6.1$  Hz, 1H,  $\text{C}_{\text{Ar}}\text{H}$ ), 7.59 (d,  $J = 8.4$  Hz, 1H,  $\text{C}_{\text{Ar}}\text{H}$ ), 7.48 (t,  $J = 7.8$  Hz, 1H,  $\text{C}_{\text{Ar}}\text{H}$ ), 7.37 (s, 1H,  $\text{C}_{\text{Ar}}\text{H}$ ), 7.36 (d,  $J = 2.8$  Hz, 1H,  $\text{C}_{\text{Ar}}\text{H}$ ), 7.33 (s, 1H,  $\text{C}_{\text{Ar}}\text{H}$ ), 7.32 (s, 1H,  $\text{C}_{\text{Ar}}\text{H}$ ), 7.24 (d,  $J = 7.8$  Hz, 2H,  $2\times\text{C}_{\text{Ar}}\text{H}$ ), 7.03 (d,  $J = 8.4$  Hz, 1H,  $\text{C}_{\text{Ar}}\text{H}$ ), 6.64 (d,  $J = 8.4$  Hz, 1H,  $\text{C}_{\text{Ar}}\text{H}$ ), 4.77 (d,  $J = 5.9$  Hz, 1H,  $-\text{CH}_2-$ ), 4.58 (d,  $J = 5.8$  Hz, 1H,  $-\text{CH}_2-$ ), 3.20 – 2.99 (m, 4H,  $4\times\text{CH}(\text{CH}_3)_2$ ), 1.49 (s, 9H,  $3\times\text{CH}_3$ ), 1.46 (m, 12H,  $4\times\text{CH}_3$ ), 1.18 (d,  $J = 6.9$  Hz, 12H,  $4\times\text{CH}_3$ );

**$^{13}\text{C}$  NMR** (151 MHz, DMSO, 295 K)  $\delta$  [ppm] = 192.53 (s, 1C,  $\text{C}_{\text{Carbene}}$ ), 165.63 (s, 1C,  $\text{C}_{\text{Carbene}}$ ), 144.67 (s, 2C,  $2\times\text{C}_{\text{Ar}}$ ), 140.02 (s, 1C,  $\text{C}_{\text{Ar}}$ ), 136.44 (s, 1C,  $\text{C}_{\text{Ar}}$ ), 131.75 (s, 1C,  $\text{C}_{\text{Ar}}$ ), 130.62 (d, 1C,  $\text{C}_{\text{Ar}}\text{H}$ ), 129.05 (d, 1C,  $\text{C}_{\text{Ar}}\text{H}$ ), 128.68 (d, 1C,  $\text{C}_{\text{Ar}}\text{H}$ ), 128.35 (d, 1C,  $\text{C}_{\text{Ar}}\text{H}$ ), 127.42 (d, 1C,  $\text{C}_{\text{Ar}}\text{H}$ ), 127.15 (d, 1C,  $\text{C}_{\text{Ar}}\text{H}$ ), 125.89 (d, 1C,  $\text{C}_{\text{Ar}}\text{H}$ ), 125.77 (s, 1C,  $\text{C}_{\text{Ar}}$ ), 124.09 (d, 1C,  $\text{C}_{\text{Ar}}\text{H}$ ), 123.88 (d, 2C,  $2\times\text{C}_{\text{Ar}}\text{H}$ ), 123.42 (s, 1C,  $\text{C}_{\text{Ar}}$ ), 123.07 (s, 1C,  $\text{C}_{\text{Ar}}$ ), 114.98 (s, 1C,  $\text{C}_{\text{Ar}}$ ), 52.78 (s, 1C,  $-\text{C}(\text{CH}_3)_3$ ), 52.34 (t, 1C,  $-\text{CH}_2-$ ), 30.88 (d, 2C,  $2\times\text{CH}(\text{CH}_3)_2$ ), 30.86 (d, 2C,  $2\times\text{CH}(\text{CH}_3)_2$ ), 29.22 (q, 3C,  $3\times\text{CH}_3$ ), 22.96 (q, 2C,  $2\times\text{CH}_3$ ), 22.56 (q, 2C,  $2\times\text{CH}_3$ ), 22.52 (q, 4C,  $4\times\text{CH}_3$ );

**$^{195}\text{Pt}$  NMR** (86 MHz,  $\text{CD}_2\text{Cl}_2$ , 295 K)  $\delta$  [ppm] = -3539.34 (s, 1Pt);

**IR** (ATR)  $\tilde{\nu}$  [ $\text{cm}^{-1}$ ] = 3224 (w), 2919 (w), 2855 (w), 2185 (s), 1606 (w), 1543 (s), 1377 (w), 1294 (w), 1217 (w), 1144 (w), 1034 (w), 853 (m), 767 (w), 712 (w), 669 (w);

**HR-MS** (MALDI):  $\text{C}_{38}\text{H}_{53}\text{Au}^{35}\text{Cl}_2\text{N}_5^{194}\text{Pt}$   $[\text{M}-\text{Cl}]^+$  calcd. 1040.2970, found 1040.2924;  $\text{C}_{38}\text{H}_{53}\text{Au}^{35}\text{Cl}^{37}\text{ClN}_5^{194}\text{Pt}$   $[\text{M}-\text{Cl}]^+$  calcd. 1042.2941, found 1042.2999;  $\text{C}_{38}\text{H}_{53}\text{Au}^{37}\text{Cl}_2\text{N}_5^{194}\text{Pt}$   $[\text{M}-\text{Cl}]^+$  calcd. 1044.2911, found 1044.3001;  $\text{C}_{38}\text{H}_{53}\text{Au}^{35}\text{Cl}_2\text{N}_5^{195}\text{Pt}$   $[\text{M}-\text{Cl}]^+$  calcd. 1041.2991, found 1041.3007;  $\text{C}_{38}\text{H}_{53}\text{Au}^{35}\text{Cl}^{37}\text{ClN}_5^{195}\text{Pt}$   $[\text{M}-\text{Cl}]^+$  calcd. 1043.2962, found 1043.3000;  $\text{C}_{38}\text{H}_{53}\text{Au}^{37}\text{Cl}_2\text{N}_5^{195}\text{Pt}$   $[\text{M}-\text{Cl}]^+$  calcd. 1045.2932, found 1045.3009;  $\text{C}_{38}\text{H}_{53}\text{Au}^{35}\text{Cl}_2\text{N}_5^{196}\text{Pt}$   $[\text{M}-\text{Cl}]^+$  calcd. 1042.2993, found 1042.2999;  $\text{C}_{38}\text{H}_{53}\text{Au}^{35}\text{Cl}^{37}\text{ClN}_5^{196}\text{Pt}$   $[\text{M}-\text{Cl}]^+$  calcd. 1044.2963,

found 1044.3001;  $C_{38}H_{53}Au^{37}Cl_2N_5^{196}Pt$   $[M-Cl]^+$  calcd. 1046.2934, found 1046.3002;  $C_{38}H_{53}Au^{35}Cl_2N_5^{198}Pt$   $[M-Cl]^+$  calcd. 1044.3022, found 1044.3001;  $C_{38}H_{53}Au^{35}Cl^{37}ClN_5^{198}Pt$   $[M-Cl]^+$  calcd. 1046.2993, found 1046.3002;  $C_{38}H_{53}Au^{37}Cl_2N_5^{198}Pt$   $[M-Cl]^+$  calcd. 1048.2963, found 1048.3011;

EA calcd. for  $C_{38}H_{53}Cl_3AuN_5Pt$ : C: 42.33, H: 4.95, N: 6.50; found C: 42.53, H: 4.48, N: 6.48.

## 2.2.26 Synthesis of Gold(I) Platinum(II) Complex 3h.

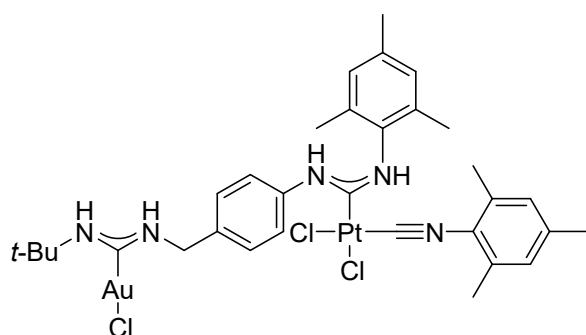

According to **GP6** the reaction was carried out with (((4-aminobenzyl)amino)(*tert*-butylamino)methylene)gold(I) chloride (50.0 mg, 114.23  $\mu$ mol, 1.00 eq.) and bis(2,4,6-trimethylphenylisocyanide) platinum(II) chloride (63.56 mg, 114.23  $\mu$ mol, 1.00 eq.) Title compound was obtained as a colorless solid (82.0 mg, 82.49  $\mu$ mol, 72 % yield).

According to **GP7** the reaction was carried out with chloro(dimethyl sulfide)gold(I) (30 mg, 102  $\mu$ mol, 1.00 eq.), *tert*-butyl isocyanide (8.47 mg, 102  $\mu$ mol, 1.00 eq.), 4-aminobenzylamine (12.4 mg, 102  $\mu$ mol, 1.00 eq.) and bis(2,4,6-trimethylphenyl) platinum(II) chloride (56.67 mg, 102  $\mu$ mol, 1.00 eq.). Title compound was obtained as a colorless solid (71.0 mg, 71.42  $\mu$ mol, 70 %).

**m.p.** = 212 – 217 °C;

**$^1H$  NMR** (700 MHz,  $CD_2Cl_2$ , 295 K)  $\delta$  [ppm] = 8.56 (d,  $J$  = 7.8 Hz, 1H,  $C_{Ar}H$ ), 7.78 (d,  $J$  = 7.8 Hz, 1H,  $C_{Ar}H$ ), 7.65 (d,  $J$  = 7.6 Hz, 1H,  $C_{Ar}H$ ), 7.52 (t,  $J$  = 7.7 Hz, 2H,  $2xC_{Ar}H$ ), 7.33 (d,  $J$  = 7.5 Hz, 2H,  $2xC_{Ar}H$ ), 7.05 (d,  $J$  = 7.5 Hz, 2H,  $2xC_{Ar}H$ ), 6.99 (d,  $J$  = 7.6 Hz, 1H,  $C_{Ar}H$ ), 6.86 (d,  $J$  = 7.5 Hz, 2H,  $2xC_{Ar}H$ ), 4.68 (s, 2H,  $-CH_2-$ ), 2.43 (s, 1H), 2.42 (s, 1H), 2.37 – 2.34 (m, 1H,  $-CH_3$ ), 2.34 (s, 3H,  $-CH_3$ ), 2.33 (s, 1H), 2.32 – 2.30 (m, 3H,  $-CH_3$ ), 2.26 - 2.25 (m, 3H,  $-CH_3$ ), 2.22 – 2.12 (m, 6H,  $2x-CH_3$ ), 2.13 (s, 3H,  $-CH_3$ ), 2.12 (s, 2H,  $2x-CH_3$ ), 1.50 (s, 9H,  $3x-CH_3$ );

**$^{13}C$  NMR** (176 MHz,  $CD_2Cl_2$ , 295 K)  $\delta$  [ppm] = 188.71 (s, 1C,  $C_{Carbene}$ ), 167.83 (s, 1C,  $C_{Carbene}$ ), 141.83 (s, 1C,  $C_{Ar}$ ), 140.84 (s, 2C,  $2xC_{Ar}$ ), 140.58 (s, 1C,  $C_{Ar}$ ), 138.73 (s, 1C,  $C_{Ar}$ ), 138.44 (s,



1C,  $\underline{C_{Ar}}$ ), 136.29 (s, 1C,  $\underline{C_{Ar}}$ ), 135.54 (s, 1C,  $\underline{C_{Ar}}$ ), 130.65 (d, 1C,  $\underline{C_{Ar}H}$ ), 129.52 (s, 1C,  $\underline{C_{Ar}}$ ), 129.38 (d, 1C,  $\underline{C_{Ar}H}$ ), 129.14 (d, 1C,  $\underline{C_{Ar}H}$ ), 128.99 (d, 1C,  $\underline{C_{Ar}H}$ ), 128.77 (d, 1C,  $\underline{C_{Ar}H}$ ), 126.33 (d, 1C,  $\underline{C_{Ar}H}$ ), 126.09 (s, 1C,  $\underline{C_{Ar}}$ ), 125.29 (d, 1C,  $\underline{C_{Ar}H}$ ), 123.74 (s, 1C,  $\underline{C_{Ar}}$ ), 100.96 (d, 1C,  $\underline{C_{Ar}H}$ ), 54.20 (s, 1C,  $-\underline{C(CH_3)_3}$ ), 53.14 (t, 1C,  $-\underline{CH_2-}$ ), 31.50 (q, 3C, 3x- $\underline{CH_3}$ ), 21.44 (q, 1C,  $-\underline{CH_3}$ ), 21.21 (q, 1C,  $-\underline{CH_3}$ ), 18.76 (q, 2C, 2x- $\underline{CH_3}$ ), 18.38 (q, 2C, 2x- $\underline{CH_3}$ );

$^{195}\text{Pt}$  NMR (86 MHz,  $\text{CD}_2\text{Cl}_2$ , 295 K)  $\delta$  [ppm] = -3551.56 (s, 1Pt);

IR (ATR)  $\tilde{\nu}$  [ $\text{cm}^{-1}$ ] = 3266 (w), 2962 (w), 2919 (w), 2860 (w), 2192 (s), 1543 (s), 1475 (m), 1395 (w), 1365 (w), 1309 (w), 1199 (m), 1034 (w), 939 (w), 852 (m), 712 (w);

HR-MS (MALDI):  $\text{C}_{32}\text{H}_{41}\text{Au}^{35}\text{Cl}_2\text{N}_5^{192}\text{Pt}$  [M-Cl] $^+$  calcd. 954.2015, found 954.2017;  $\text{C}_{32}\text{H}_{41}\text{Au}^{35}\text{Cl}^{37}\text{ClN}_5^{192}\text{Pt}$  [M-Cl] $^+$  calcd. 956.1985, found 956.2036;  $\text{C}_{32}\text{H}_{41}\text{Au}^{37}\text{Cl}_2\text{N}_5^{192}\text{Pt}$  [M-Cl] $^+$  calcd. 958.1956, found 958.1294;  $\text{C}_{32}\text{H}_{41}\text{Au}^{35}\text{Cl}_2\text{N}_5^{194}\text{Pt}$  [M-Cl] $^+$  calcd. 956.2031, found 956.2036;  $\text{C}_{32}\text{H}_{41}\text{Au}^{35}\text{Cl}^{37}\text{ClN}_5^{194}\text{Pt}$  [M-Cl] $^+$  calcd. 958.2002, found 958.2051;  $\text{C}_{32}\text{H}_{41}\text{Au}^{37}\text{Cl}_2\text{N}_5^{194}\text{Pt}$  [M-Cl] $^+$  calcd. 960.1972, found 960.2052;  $\text{C}_{32}\text{H}_{41}\text{Au}^{35}\text{Cl}_2\text{N}_5^{195}\text{Pt}$  [M-Cl] $^+$  calcd. 957.2052, found 957.2060;  $\text{C}_{32}\text{H}_{41}\text{Au}^{35}\text{Cl}^{37}\text{ClN}_5^{195}\text{Pt}$  [M-Cl] $^+$  calcd. 959.2023, found 959.2050;  $\text{C}_{32}\text{H}_{41}\text{Au}^{37}\text{Cl}_2\text{N}_5^{195}\text{Pt}$  [M-Cl] $^+$  calcd. : 961.1993, found 961.2059;  $\text{C}_{32}\text{H}_{41}\text{Au}^{35}\text{Cl}_2\text{N}_5^{196}\text{Pt}$  [M-Cl] $^+$  calcd. 958.2054, found 958.2051;  $\text{C}_{32}\text{H}_{41}\text{Au}^{35}\text{Cl}^{37}\text{ClN}_5^{196}\text{Pt}$  [M-Cl] $^+$  calcd. 960.2024, found 960.2052;  $\text{C}_{32}\text{H}_{41}\text{Au}^{37}\text{Cl}_2\text{N}_5^{196}\text{Pt}$  [M-Cl] $^+$  calcd. 962.1995, found 962.2049;  $\text{C}_{32}\text{H}_{41}\text{Au}^{35}\text{Cl}_2\text{N}_5^{198}\text{Pt}$  [M-Cl] $^+$  calcd. 960.2083, found 960.2052;  $\text{C}_{32}\text{H}_{41}\text{Au}^{35}\text{Cl}^{37}\text{ClN}_5^{198}\text{Pt}$  [M-Cl] $^+$  calcd. 962.2054, found 962.2049;  $\text{C}_{32}\text{H}_{41}\text{Au}^{37}\text{Cl}_2\text{N}_5^{198}\text{Pt}$  [M-Cl] $^+$  calcd. 964.2024, found 964.2063;

EA calcd. for  $\text{C}_{32}\text{H}_{41}\text{Cl}_3\text{AuN}_5\text{Pt}$ : C: 38.66, H: 4.16, N: 7.04; found C: 37.53, H: 4.21, N: 6.80.

### 2.2.27 Synthesis of Gold(I) Platinum(II) Complex 3i

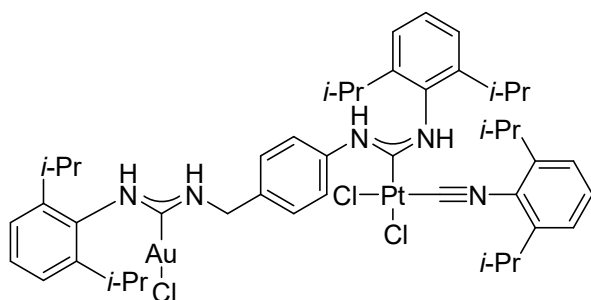

According to **GP6** the reaction was carried out with (((4-aminobenzyl)amino)((2,6-diisopropylphenyl)amino)methylene)gold(I) chloride (50.0 mg, 92.27  $\mu\text{mol}$ , 1.00 eq.) and

bis(2,6-diisopropylphenylisonitrile) platinum(II) chloride (59.11 mg, 92.27  $\mu\text{mol}$ , 1.00 eq.)  
Title compound was obtained as a colorless solid (87.0 mg, 73.58  $\mu\text{mol}$ , 80 % yield).

According to **GP7** the reaction was carried out with chloro(dimethyl sulfide)gold(I) (30 mg, 102  $\mu\text{mol}$ , 1.00 eq.), 2,6-diisopropylphenyl isocyanide (19.08 mg, 102  $\mu\text{mol}$ , 1.00 eq.), 4-aminobenzylamine (12.4 mg, 102  $\mu\text{mol}$ , 1.00 eq.) and bis(2,6-diisopropylphenyl) platinum(II) chloride (65.2 mg, 102  $\mu\text{mol}$ , 1.00 eq.). Title compound was obtained as a colorless solid (88 mg, 74.4  $\mu\text{mol}$ , 73 %).

**mp** = 215 – 220 °C;

**$^1\text{H}$  NMR** (400 MHz,  $\text{CD}_2\text{Cl}_2$ , 295 K)  $\delta$  [ppm] = 8.65 (s, 1H,  $\text{C}_{\text{Ar}}\text{H}$ ), 8.01 – 7.84 (m, 1H,  $\text{C}_{\text{Ar}}\text{H}$ ), 7.64 – 7.59 (m, 1H,  $\text{C}_{\text{Ar}}\text{H}$ ), 7.48 (q,  $J = 7.1$  Hz, 1H,  $\text{C}_{\text{Ar}}\text{H}$ ), 7.41 – 7.36 (m, 2H,  $2\times\text{C}_{\text{Ar}}\text{H}$ ), 7.36 – 7.32 (m, 2H,  $2\times\text{C}_{\text{Ar}}\text{H}$ ), 7.28 (t,  $J = 8.2$  Hz, 2H,  $2\times\text{C}_{\text{Ar}}\text{H}$ ), 7.22 (dd,  $J = 7.8, 4.0$  Hz, 3H,  $3\times\text{C}_{\text{Ar}}\text{H}$ ), 7.16 (d,  $J = 7.8$  Hz, 1H,  $\text{C}_{\text{Ar}}\text{H}$ ), 7.08 (d,  $J = 8.5$  Hz, 1H,  $\text{C}_{\text{Ar}}\text{H}$ ), 6.73 (d,  $J = 8.3$  Hz, 1H,  $\text{C}_{\text{Ar}}\text{H}$ ), 6.23 – 6.09 (m, 1H,  $\text{C}_{\text{Ar}}\text{H}$ ), 4.80 (d,  $J = 6.2$  Hz, 1H,  $-\text{CH}_2-$ ), 4.76 (d,  $J = 6.1$  Hz, 1H,  $-\text{CH}_2-$ ), 3.34 (pd,  $J = 6.9, 1.7$  Hz, 2H,  $\text{CH}$ ), 3.12 – 2.94 (m, 4H,  $\text{CH}$ ), 1.30 (d,  $J = 6.9$  Hz, 3H,  $-\text{CH}_3$ ), 1.22 (t,  $J = 6.8$  Hz, 9H,  $3\times\text{CH}_3$ ), 1.15 (dt,  $J = 6.8, 5.0$  Hz, 15H,  $5\times\text{CH}_3$ ), 1.07 (dd,  $J = 10.2, 6.9$  Hz, 9H,  $3\times\text{CH}_3$ );

**$^{13}\text{C}$  NMR** (101 MHz,  $\text{CD}_2\text{Cl}_2$ , 295 K)  $\delta$  [ppm] = 192.42 (s, 1C,  $\text{C}_{\text{Carbene}}$ ), 170.20 (s, 1C,  $\text{C}_{\text{Carbene}}$ ), 147.18 (s, 2C,  $2\times\text{C}_{\text{Ar}}$ ), 146.91 (s, 2C,  $2\times\text{C}_{\text{Ar}}$ ), 146.78 (s, 1C,  $\text{C}_{\text{Ar}}$ ), 145.94 (s, 1C,  $\text{C}_{\text{Ar}}$ ), 139.24 (s, 1C,  $\text{C}_{\text{Ar}}$ ), 136.39 (s, 1C,  $\text{C}_{\text{Ar}}$ ), 131.72 (s, 1C,  $\text{C}_{\text{Ar}}$ ), 131.28 (d, 1C,  $\text{C}_{\text{Ar}}\text{H}$ ), 130.92 (d, 1C,  $\text{C}_{\text{Ar}}\text{H}$ ), 130.84 (d, 1C,  $\text{C}_{\text{Ar}}\text{H}$ ), 130.73 (d, 1C,  $\text{C}_{\text{Ar}}\text{H}$ ), 129.87 (s, 1C,  $\text{C}_{\text{Ar}}$ ), 129.58 (s, 1C,  $\text{C}_{\text{Ar}}$ ), 129.48 (s, 1C,  $\text{C}_{\text{Ar}}$ ), 129.30 (d, 1C,  $\text{C}_{\text{Ar}}\text{H}$ ), 128.99 (d, 1C,  $\text{C}_{\text{Ar}}\text{H}$ ), 125.63 (d, 1C,  $\text{C}_{\text{Ar}}\text{H}$ ), 125.37 (d, 1C,  $\text{C}_{\text{Ar}}\text{H}$ ), 125.33 (d, 1C,  $\text{C}_{\text{Ar}}\text{H}$ ), 125.18 (d, 1C,  $\text{C}_{\text{Ar}}\text{H}$ ), 124.33 (d, 1C,  $\text{C}_{\text{Ar}}\text{H}$ ), 124.05 (d, 1C,  $\text{C}_{\text{Ar}}\text{H}$ ), 116.67 (d, 1C,  $\text{C}_{\text{Ar}}\text{H}$ ), 53.52 (t, 1C,  $-\text{CH}_2-$ ), 30.39 (d, 1C,  $-\text{CH}(\text{CH}_3)_3$ ), 29.98 (d, 2C,  $2\times\text{CH}(\text{CH}_3)_3$ ), 29.15 (d, 2C,  $2\times\text{CH}(\text{CH}_3)_3$ ), 29.05 (d, 1C,  $-\text{CH}(\text{CH}_3)_3$ ), 24.79 (q, 2C,  $2\times\text{CH}_3$ ), 24.74 (q, 1C,  $-\text{CH}_3$ ), 24.62 (q, 1C,  $-\text{CH}_3$ ), 23.54 (q, 1C,  $-\text{CH}_3$ ), 23.28 (q, 1C,  $-\text{CH}_3$ ), 23.19 (q, 2C,  $2\times\text{CH}_3$ ), 23.01 (q, 2C,  $2\times\text{CH}_3$ ), 22.85 (q, 2C,  $2\times\text{CH}_3$ );

**$^{195}\text{Pt}$  NMR** (86 MHz,  $\text{CD}_2\text{Cl}_2$ , 295 K)  $\delta$  [ppm] = -3524.06 (s, 1Pt);

**IR** (ATR)  $\tilde{\nu}$  [ $\text{cm}^{-1}$ ] = 3215 (w), 2963 (m), 2927 (w), 2868 (w), 2186 (m), 1592 (w), 1543 (s), 1462 (m), 1385 (w), 1364 (w), 1331 (w), 1300 (w), 1216 (w), 1181 (m), 1108 (m), 1058 (w), 1018 (w), 936 (w), 800 (m), 749 (m), 669 (w);

**HR-MS** (EI (+)):  $C_{46}H_{61}Au^{35}Cl_2N_5^{192}Pt [M]^+$  calcd. 1142.3580, found 1142.3568;  $C_{46}H_{61}Au^{35}Cl^{37}ClN_5^{192}Pt [M]^+$  calcd. 1144.3550, found 1144.3592;  $C_{46}H_{61}Au^{37}Cl_2N_5^{192}Pt$  calcd. 1146.3521, found 1146.3616;  $C_{46}H_{61}Au^{35}Cl_2N_5^{194}Pt [M]^+$  calcd. 1144.3596, found 1144.3592;  $C_{46}H_{61}Au^{35}Cl^{37}ClN_5^{194}Pt [M]^+$  calcd. 1146.3567, found 1146.3616;  $C_{46}H_{61}Au^{37}Cl_2N_5^{194}Pt [M]^+$  calcd. 1148.3537, found 1148.3616;  $C_{46}H_{61}Au^{35}Cl_2N_5^{195}Pt [M]^+$  calcd. 1145.3617, found 1145.3618;  $C_{46}H_{61}Au^{35}Cl^{37}ClN_5^{195}Pt [M]^+$  calcd. 1147.3588, found 1147.3617;  $C_{46}H_{61}Au^{37}Cl_2N_5^{195}Pt [M]^+$  calcd. 1149.3558, found 1149.3626;  $C_{46}H_{61}Au^{35}Cl_2N_5^{196}Pt [M]^+$  calcd. 1146.3619, found 1146.3616;  $C_{46}H_{61}Au^{35}Cl^{37}ClN_5^{196}Pt [M]^+$  calcd. 1148.3589, found 1148.3616;  $C_{46}H_{61}Au^{37}Cl_2N_5^{196}Pt [M]^+$  calcd. 1150.3560, found 1150.3620;  $C_{46}H_{61}Au^{35}Cl_2N_5^{198}Pt [M]^+$  calcd. 1148.3648, found 1148.3616;  $C_{46}H_{61}Au^{35}Cl^{37}ClN_5^{198}Pt [M]^+$  calcd. 1150.3619, found 1150.3620;  $C_{46}H_{61}Au^{37}Cl_2N_5^{198}Pt [M]^+$  calcd. 1152.3589, found 1152.3641;

**EA** calcd. for  $C_{46}H_{61}Cl_3AuN_5Pt$ : C: 46.73, H: 5.20, N: 5.92; found C: 46.68, H: 5.38, N: 6.15.

### 2.2.28 Synthesis of Gold(I) Platinum(II) Complex 3j

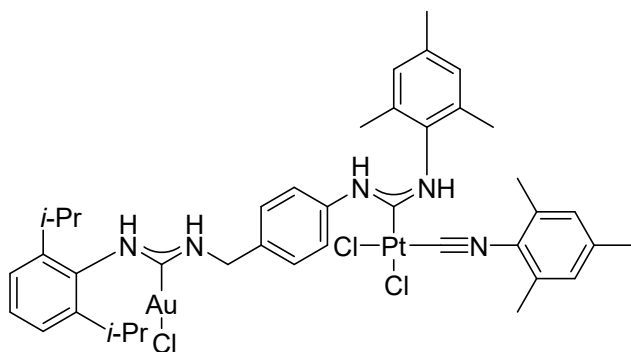

According to **GP6** the reaction was carried out with (((4-aminobenzyl)amino)((2,6-diisopropylphenyl)amino)methylene)gold(I) chloride (50.0 mg, 92.27  $\mu$ mol, 1.00 eq.) and bis(2,4,6-trimethylphenylisonitrile) platinum(II) chloride (51.34 mg, 92.27  $\mu$ mol, 1.00 eq.) Title compound was obtained as a colorless solid (85.0 mg, 77.39  $\mu$ mol, 84 % yield).

According to **GP7** the reaction was carried out with chloro(dimethyl sulfide)gold(I) (30 mg, 102  $\mu$ mol, 1.00 eq.), 2,6-diisopropylphenyl isocyanide (19.08 mg, 102  $\mu$ mol, 1.00 eq.), 3-aminobenzylamine (12.4 mg, 102  $\mu$ mol, 1.00 eq.) and bis(2,4,6-trimethylphenyl) platinum(II) chloride (56.67 mg, 102  $\mu$ mol, 1.00 eq.). Title compound was obtained as a colorless solid (74.0 mg, 67.38  $\mu$ mol, 66 %).

**m.p.** = 194 – 199  $^{\circ}C$ ;

**<sup>1</sup>H NMR** (600 MHz, CD<sub>2</sub>Cl<sub>2</sub>, 295 K) δ [ppm] = 8.76 – 8.06 (m, 2H, 2xC<sub>Ar</sub>H), 7.59 (d, *J* = 8.5 Hz, 2H, 2xC<sub>Ar</sub>H), 7.44 – 7.32 (m, 2H, 2xC<sub>Ar</sub>H), 7.26 (d, *J* = 8.5 Hz, 1H, C<sub>Ar</sub>H), 7.22 (d, *J* = 7.8 Hz, 1H, C<sub>Ar</sub>H), 7.18 (d, *J* = 7.8 Hz, 1H, C<sub>Ar</sub>H), 7.07 (d, *J* = 8.4 Hz, 1H, C<sub>Ar</sub>H), 7.05 (s, 1H, C<sub>Ar</sub>H), 7.00 (s, 3H, 3xC<sub>Ar</sub>H), 6.91 (s, 1H, C<sub>Ar</sub>H), 6.71 (d, *J* = 6.9 Hz, 1H, C<sub>Ar</sub>H), 6.27 – 6.08 (m, 1H, C<sub>Ar</sub>H), 4.82 (d, *J* = 6.2 Hz, 1H, -CH<sub>2</sub>-), 4.75 (d, *J* = 6.1 Hz, 1H, -CH<sub>2</sub>-), 3.10 – 3.00 (m, 2H, -CH(CH<sub>3</sub>)<sub>2</sub>), 2.43 (d, *J* = 2.0 Hz, 6H, 2x-CH<sub>3</sub>), 2.34 (s, 3H, -CH<sub>3</sub>), 2.32 (s, 6H, 2x-CH<sub>3</sub>), 2.16 (s, 3H, -CH<sub>3</sub>), 1.16 (d, *J* = 6.7 Hz, 3H, -CH<sub>3</sub>), 1.13 (d, *J* = 6.7 Hz, 3H, -CH<sub>3</sub>), 1.08 (d, *J* = 6.9 Hz, 3H, -CH<sub>3</sub>), 1.05 (d, *J* = 6.9 Hz, 3H, -CH<sub>3</sub>);

**<sup>13</sup>C NMR** (151 MHz, CD<sub>2</sub>Cl<sub>2</sub>, 295 K) δ [ppm] = 190.87 (s, 1C, C<sub>Carbene</sub>), 169.30 (s, 1C, C<sub>Carbene</sub>), 146.82 (s, 1C, C<sub>Ar</sub>), 146.69 (s, 2C, 2xC<sub>Ar</sub>), 141.80, (s, 1C, C<sub>Ar</sub>) 140.66 (s, 1C, C<sub>Ar</sub>), 140.40 (s, 1C, C<sub>Ar</sub>), 139.25 (s, 1C, C<sub>Ar</sub>), 136.37 (s, 1C, C<sub>Ar</sub>), 136.32 (s, 1C, C<sub>Ar</sub>), 136.23 (s, 1C, C<sub>Ar</sub>), 135.46 (s, 1C, C<sub>Ar</sub>), 130.74 (d, 1C, C<sub>Ar</sub>H), 130.61 (d, 1C, C<sub>Ar</sub>H), 130.54 (d, 1C, C<sub>Ar</sub>H), 129.91 (s, 1C, C<sub>Ar</sub>), 129.74 (s, 1C, C<sub>Ar</sub>), 129.60 (s, 1C, C<sub>Ar</sub>), 129.36 (d, 1C, C<sub>Ar</sub>H), 129.19 (d, 1C, C<sub>Ar</sub>H), 129.13 (d, 1C, C<sub>Ar</sub>H), 128.76 (d, 1C, C<sub>Ar</sub>H), 125.76 (d, 1C, C<sub>Ar</sub>H), 125.16 (d, 1C, C<sub>Ar</sub>H), 125.10 (d, 1C, C<sub>Ar</sub>H), 100.93 (d, 1C, C<sub>Ar</sub>H), 53.34 (t, 1C, -CH<sub>2</sub>-), 31.26 (q, 1C, -CH<sub>3</sub>), 29.09 (d, 2C, 2x-CH(CH<sub>3</sub>)<sub>2</sub>), 24.80 (q, 1C, -CH<sub>3</sub>), 24.76 (q, 1C, -CH<sub>3</sub>), 23.22 (q, 1C, -CH<sub>3</sub>), 23.15 (q, 1C, -CH<sub>3</sub>), 21.52 (q, 1C, -CH<sub>3</sub>), 21.44 (q, 1C, -CH<sub>3</sub>), 21.19 (q, 1C, -CH<sub>3</sub>), 18.72 (q, 1C, -CH<sub>3</sub>), 18.36 (q, 1C, -CH<sub>3</sub>);

**<sup>195</sup>Pt NMR** (86 MHz, CD<sub>2</sub>Cl<sub>2</sub>, 295 K) δ [ppm] = -3536.97 (s, 1Pt);

**IR** (ATR)  $\tilde{\nu}$  [cm<sup>-1</sup>] = 3221 (w), 2962 (w), 2923 (w), 2865 (w), 2187 (s), 1594 (w), 1543 (s), 1382 (w), 1308 (w), 1218 (w), 1057 (w), 936 (w), 854 (w), 807 (m), 783 (m), 712 (w), 669 (w);

**HR-MS** (MALDI): C<sub>40</sub>H<sub>49</sub>Au<sup>35</sup>Cl<sub>2</sub>N<sub>5</sub><sup>192</sup>Pt [M-Cl]<sup>+</sup> calcd. 1058.2641, found 1058.2630; C<sub>40</sub>H<sub>49</sub>Au<sup>35</sup>Cl<sup>37</sup>CIN<sub>5</sub><sup>192</sup>Pt [M-Cl]<sup>+</sup> calcd. 1060.2611, found 1060.2649; C<sub>40</sub>H<sub>49</sub>Au<sup>37</sup>Cl<sub>2</sub>N<sub>5</sub><sup>192</sup>Pt [M-Cl]<sup>+</sup> calcd. 1062.2582, found 1062.2667; C<sub>40</sub>H<sub>49</sub>Au<sup>35</sup>Cl<sub>2</sub>N<sub>5</sub><sup>194</sup>Pt [M-Cl]<sup>+</sup> calcd. 1060.2657, found 1060.2649; C<sub>40</sub>H<sub>49</sub>Au<sup>35</sup>Cl<sup>37</sup>CIN<sub>5</sub><sup>194</sup>Pt [M-Cl]<sup>+</sup> calcd. 1062.2628, found 1062.2667; C<sub>40</sub>H<sub>49</sub>Au<sup>37</sup>Cl<sub>2</sub>N<sub>5</sub><sup>194</sup>Pt [M-Cl]<sup>+</sup> calcd. 1064.2598, found 1064.2668; C<sub>40</sub>H<sub>49</sub>Au<sup>35</sup>Cl<sub>2</sub>N<sub>5</sub><sup>195</sup>Pt [M-Cl]<sup>+</sup> calcd. 1061.2678, found 1061.2674; C<sub>40</sub>H<sub>49</sub>Au<sup>35</sup>Cl<sup>37</sup>CIN<sub>5</sub><sup>195</sup>Pt [M-Cl]<sup>+</sup> calcd. 1063.2649, found 1063.2669; C<sub>40</sub>H<sub>49</sub>Au<sup>37</sup>Cl<sub>2</sub>N<sub>5</sub><sup>195</sup>Pt [M-Cl]<sup>+</sup> calcd. 1065.2619, found 1065.2677; C<sub>40</sub>H<sub>49</sub>Au<sup>35</sup>Cl<sub>2</sub>N<sub>5</sub><sup>196</sup>Pt [M-Cl]<sup>+</sup> calcd. 1062.2680, found 1062.2667; C<sub>40</sub>H<sub>49</sub>Au<sup>35</sup>Cl<sup>37</sup>CIN<sub>5</sub><sup>196</sup>Pt [M-Cl]<sup>+</sup> calcd. 1064.2650, found 1064.2668; C<sub>40</sub>H<sub>49</sub>Au<sup>37</sup>Cl<sub>2</sub>N<sub>5</sub><sup>196</sup>Pt [M-Cl]<sup>+</sup> calcd. 1066.2621, found 1066.2669; C<sub>40</sub>H<sub>49</sub>Au<sup>35</sup>Cl<sub>2</sub>N<sub>5</sub><sup>198</sup>Pt [M-Cl]<sup>+</sup> calcd. 1064.2709, found 1064.2668;

$C_{40}H_{49}Au^{35}Cl^{37}N_5^{198}Pt$   $[M-Cl]^+$  calcd. 1066.2680, found 1066.2669;  $C_{40}H_{49}Au^{37}Cl_2N_5^{198}Pt$   $[M-Cl]^+$  calcd. 1068.2650, found 1068.2686;

EA calcd. for  $C_{40}H_{49}Cl_3AuN_5Pt$ : C: 43.75, H: 4.50, N: 6.38; found C: 43.71, H: 5.06, N: 6.64.

### 2.2.29 Synthesis of Gold(I) Platinum(II) Complex 3k

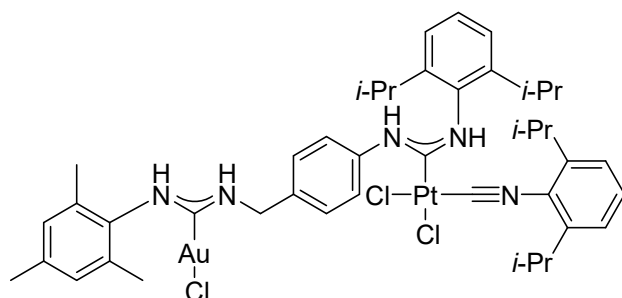

According to **GP6** the reaction was carried out with (((4-aminobenzyl)amino)((2,4,6-trimethylphenyl)amino)methylene)gold(I) chloride (50.0 mg, 100.04  $\mu$ mol, 1.00 eq.) and bis(2,6-diisopropylphenylisonitrile) platinum(II) chloride (64.08 mg, 100.04  $\mu$ mol, 1.00 eq.) Title compound was obtained as a colorless solid (79.0 mg, 75.12  $\mu$ mol, 75 % yield).

According to **GP7** the reaction was carried out with chloro(dimethyl sulfide)gold(I) (30 mg, 102  $\mu$ mol, 1.00 eq.), 2,4,6-trimethylphenyl isocyanide (14.79 mg, 102  $\mu$ mol, 1.00 eq.), 3-aminobenzylamine (12.4 mg, 102  $\mu$ mol, 1.00 eq.) and bis(2,6-diisopropylphenyl) platinum(II) chloride (56.2 mg, 102  $\mu$ mol, 1.00 eq.). Title compound was obtained as a colorless solid (69.0 mg, 65.61  $\mu$ mol, 64 %).

**m.p.** > 300 °C;

**$^1H$  NMR** (700 MHz,  $CD_2Cl_2$ , 295 K)  $\delta$  [ppm] = 8.58 (s, 1H,  $C_{Ar}H$ ), 7.92 (s, 1H,  $C_{Ar}H$ ), 7.77 (s, 1H,  $C_{Ar}H$ ), 7.65 – 7.59 (m, 2H,  $2x C_{Ar}H$ ), 7.48 (dt,  $J = 9.9, 7.7$  Hz, 2H,  $2x C_{Ar}H$ ), 7.38 (t,  $J = 7.9$  Hz, 1H,  $C_{Ar}H$ ), 7.35 (d,  $J = 7.8$  Hz, 1H,  $C_{Ar}H$ ), 7.27 (t,  $J = 7.5$  Hz, 1H,  $C_{Ar}H$ ), 7.17 (d,  $J = 7.8$  Hz, 2H,  $2x C_{Ar}H$ ), 7.04 (d,  $J = 8.4$  Hz, 1H,  $C_{Ar}H$ ), 6.93 (s, 1H,  $C_{Ar}H$ ), 6.60 (d,  $J = 8.4$  Hz, 1H,  $C_{Ar}H$ ), 6.24 (t,  $J = 6.2$  Hz, 1H,  $C_{Ar}H$ ), 4.81 (d,  $J = 6.2$  Hz, 1H,  $-CH_2-$ ), 4.73 (d,  $J = 6.2$  Hz, 1H,  $-CH_2-$ ), 3.34 (hept,  $J = 6.8$  Hz, 3H,  $3x-CH(CH_3)_3$ ), 3.05 (hept,  $J = 6.8$  Hz, 1H,  $3x-CH(CH_3)_3$ ), 2.27 – 2.11 (m, 9H,  $3x-CH_3$ ), 1.30 (d,  $J = 7.0$  Hz, 12H,  $4x-CH_3$ ), 1.22 (d,  $J = 4.5$  Hz, 3H,  $-CH_3$ ), 1.21 (d,  $J = 4.5$  Hz, 3H,  $-CH_3$ ), 1.16 (d,  $J = 6.8$  Hz, 6H,  $2x-CH_3$ );

**$^{13}C$  NMR** (176 MHz,  $CD_2Cl_2$ , 295 K)  $\delta$  [ppm] = 191.37 (s, 1C,  $C_{Carbene}$ ), 169.82 (s, 1C,  $C_{Carbene}$ ), 146.74 (s, 1C,  $C_{Ar}$ ), 146.68 (s, 1C,  $C_{Ar}$ ), 146.26 (s, 1C,  $C_{Ar}$ ), 145.52 (s, 1C,  $C_{Ar}$ ), 139.61 (s, 1C,

$\underline{C}_{Ar}$ ), 139.42 (s, 1C,  $\underline{C}_{Ar}$ ), 138.62 (s, 1C,  $\underline{C}_{Ar}$ ), 136.45 (s, 1C,  $\underline{C}_{Ar}$ ), 135.69 (s, 1C,  $\underline{C}_{Ar}$ ), 135.52 (s, 1C,  $\underline{C}_{Ar}$ ), 131.29 (s, 1C,  $\underline{C}_{Ar}$ ), 130.86 (d, 1C,  $\underline{C}_{Ar}H$ ), 130.39 (d, 1C,  $\underline{C}_{Ar}H$ ), 129.95 (d, 1C,  $\underline{C}_{Ar}H$ ), 129.81 (d, 1C,  $\underline{C}_{Ar}H$ ), 129.64 (d, 1C,  $\underline{C}_{Ar}H$ ), 129.41 (s, 1C,  $\underline{C}_{Ar}$ ), 129.01 (s, 1C,  $\underline{C}_{Ar}$ ), 128.69 (d, 1C,  $\underline{C}_{Ar}H$ ), 128.18 (d, 1C,  $\underline{C}_{Ar}H$ ), 125.18 (d, 1C,  $\underline{C}_{Ar}H$ ), 125.09 (d, 1C,  $\underline{C}_{Ar}H$ ), 123.89 (d, 1C,  $\underline{C}_{Ar}H$ ), 123.58 (d, 1C), 114.92 (d, 1C), 52.70 (t, 1C,  $-\underline{CH}_2-$ ), 29.95 (d, 2C, 2x- $\underline{CH}(\text{CH}_3)_2$ ), 29.55 (d, 1C,  $-\underline{CH}(\text{CH}_3)_2$ ), 28.61 (d, 1C,  $-\underline{CH}(\text{CH}_3)_2$ ), 24.20 (q, 2C, 2x- $\underline{CH}_3$ ), 23.12 (q, 2C, 2x- $\underline{CH}_3$ ), 22.62 (q, 2C, 2x- $\underline{CH}_3$ ), 22.42 (q, 2C, 2x- $\underline{CH}_3$ ), 20.71 (q, 1C,  $-\underline{CH}_3$ ), 17.91 (q, 2C, 2x- $\underline{CH}_3$ );

$^{195}\text{Pt}$  NMR (86 MHz,  $\text{CD}_2\text{Cl}_2$ , 295 K)  $\delta$  [ppm] = -3532.08 (s, 1Pt).

IR (ATR)  $\tilde{\nu}$  [ $\text{cm}^{-1}$ ] = 3242 (m), 2964 (s), 2872 (m), 2188 (w), 1718 (s), 1660 (w), 1608 (w), 1551 (s), 1488 (w), 1460 (w), 1385 (w), 1365 (w), 1315 (w), 1183 (w), 1062 (m), 1035 (m), 954 (w), 855 (w), 801 (w), 750 (w), 695 (w);

**HR-MS** (ESI (+)):  $\text{C}_{43}\text{H}_{55}\text{Au}^{35}\text{Cl}_2\text{N}_5^{192}\text{Pt}$  [M-Cl] $^+$  calcd. 1100.3110, found 1100.3116;  $\text{C}_{43}\text{H}_{55}\text{Au}^{35}\text{Cl}^{37}\text{ClN}_5^{192}\text{Pt}$  [M-Cl] $^+$  calcd. 1102.3081, found 1102.3139;  $\text{C}_{43}\text{H}_{55}\text{Au}^{37}\text{Cl}_2\text{N}_5^{192}\text{Pt}$  [M-Cl] $^+$  calcd. 1104.3051, found 1104.3158;  $\text{C}_{43}\text{H}_{55}\text{Au}^{35}\text{Cl}_2\text{N}_5^{194}\text{Pt}$  [M-Cl] $^+$  calcd. 1102.3127, found 1102.3139;  $\text{C}_{43}\text{H}_{55}\text{Au}^{35}\text{Cl}^{37}\text{ClN}_5^{194}\text{Pt}$  [M-Cl] $^+$  calcd. 1104.3097, found 1104.3158;  $\text{C}_{43}\text{H}_{55}\text{Au}^{37}\text{Cl}_2\text{N}_5^{194}\text{Pt}$  [M-Cl] $^+$  calcd. 1106.3068, found 1106.3159;  $\text{C}_{43}\text{H}_{55}\text{Au}^{35}\text{Cl}_2\text{N}_5^{195}\text{Pt}$  [M-Cl] $^+$  calcd. 1103.3148, found 1103.3165;  $\text{C}_{43}\text{H}_{55}\text{Au}^{35}\text{Cl}^{37}\text{ClN}_5^{195}\text{Pt}$  [M-Cl] $^+$  calcd. 1105.3118, found 1105.3160;  $\text{C}_{43}\text{H}_{55}\text{Au}^{37}\text{Cl}_2\text{N}_5^{195}\text{Pt}$  [M-Cl] $^+$  calcd. 1107.3089, found 1107.3169;  $\text{C}_{43}\text{H}_{55}\text{Au}^{35}\text{Cl}_2\text{N}_5^{196}\text{Pt}$  [M-Cl] $^+$  calcd. 1104.3149, found 1104.3158;  $\text{C}_{43}\text{H}_{55}\text{Au}^{35}\text{Cl}^{37}\text{ClN}_5^{196}\text{Pt}$  [M-Cl] $^+$  calcd. 1106.3120, found 1106.3159;  $\text{C}_{43}\text{H}_{55}\text{Au}^{37}\text{Cl}_2\text{N}_5^{196}\text{Pt}$  [M-Cl] $^+$  calcd. 1108.3090, found 1108.3162;  $\text{C}_{43}\text{H}_{55}\text{Au}^{35}\text{Cl}_2\text{N}_5^{198}\text{Pt}$  [M-Cl] $^+$  calcd. 1106.3179, found 1106.3159;  $\text{C}_{43}\text{H}_{55}\text{Au}^{35}\text{Cl}^{37}\text{ClN}_5^{198}\text{Pt}$  [M-Cl] $^+$  calcd. 1108.3149, found 1108.3090;  $\text{C}_{43}\text{H}_{55}\text{Au}^{37}\text{Cl}_2\text{N}_5^{198}\text{Pt}$  [M-Cl] $^+$  calcd. 1110.3120, found 1110.3183;

**EA** calcd. for  $\text{C}_{43}\text{H}_{55}\text{Cl}_3\text{AuN}_5\text{Pt}$ : C: 45.29, H: 4.86, N: 6.14; found C: 45.57, H: 5.00, N: 6.31.

### 2.2.30 Synthesis of Gold(I) Platinum(II) Complex 3I

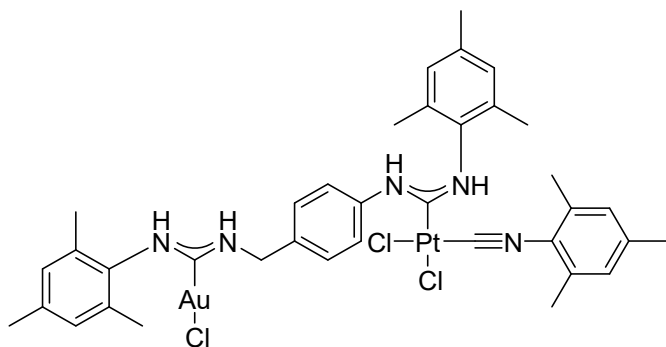

According to **GP6** the reaction was carried out with (((4-aminobenzyl)amino)(2,4,6-trimethylphenylamino)methylene)gold(I) chloride (50.0 mg, 100.04  $\mu\text{mol}$ , 1.00 eq.) and bis(2,4,6-trimethylphenylisocyanide) platinum(II) chloride (55.66 mg, 100.04  $\mu\text{mol}$ , 1.00 eq.) Title compound was obtained as a colorless solid (83.0 mg, 83.49  $\mu\text{mol}$ , 83 % yield).

**m.p.** = 264 – 269 °C;

**$^1\text{H}$  NMR** (700 MHz,  $\text{CD}_2\text{Cl}_2$ , 295 K)  $\delta$  [ppm] = 8.56 (s, 1H,  $\text{C}_{\text{Ar}}\text{H}$ ), 7.95 (s, 1H,  $\text{C}_{\text{Ar}}\text{H}$ ), 7.55 (s, 1H,  $\text{C}_{\text{Ar}}\text{H}$ ), 7.54 – 7.44 (m, 2H, 2x  $\text{C}_{\text{Ar}}\text{H}$ ), 7.31 – 7.11 (m, 2H, 2x  $\text{C}_{\text{Ar}}\text{H}$ ), 6.97 – 6.90 (m, 3H, 3x  $\text{C}_{\text{Ar}}\text{H}$ ), 6.80 (d,  $J$  = 12.2 Hz, 3H, 3x  $\text{C}_{\text{Ar}}\text{H}$ ), 6.20 (t,  $J$  = 6.4 Hz, 1H,  $\text{C}_{\text{Ar}}\text{H}$ ), 4.73 (d,  $J$  = 6.4 Hz, 2H,  $-\text{CH}_2-$ ), 2.35 (s, 2H, 2x  $-\text{CH}_3$ ), 2.26 (s, 6H), 2.24 (m, 3H,  $-\text{CH}_3$ ), 2.19 (s, 4H,  $-\text{CH}_3$  and  $\text{CH}_3$ ), 2.12 (m, 4H,  $-\text{CH}_3$  and  $\text{CH}_3$ ), 2.07 (s, 6H, 2x  $-\text{CH}_3$ ), 2.03 (s, 3H,  $-\text{CH}_3$ );

**$^{13}\text{C}$  NMR** (176 MHz,  $\text{CD}_2\text{Cl}_2$ , 295 K)  $\delta$  [ppm] = 191.43 (s, 1C), 169.29 (s, 1C), 141.81 (s, 1C), 140.62 (s, 1C), 140.40 (s, 1C), 139.91 (s, 1C), 139.18 (s, 1C), 136.88 (s, 1C), 136.71 (s, 1C), 136.35 (s, 1C), 136.25 (s, 1C), 135.94 (s, 1C), 135.51 (s, 1C), 130.59 (d, 1C), 130.54 (d, 1C), 130.26 (d, 1C), 129.94 (s, 1C), 129.65 (s, 1C), 129.37 (d, 1C), 129.26 (d, 1C), 129.12 (d, 1C), 128.56 (d, 1C), 125.82 (d, 1C), 125.61 (s, 1C), 123.99 (s, 1C), 115.36 (d, 1C), 100.96 (d, 1C), 31.27 (t, 1C), 21.44 (q, 1C), 21.20 (q, 1C), 21.08 (q, 1C), 18.73 (q, 2C), 18.37 (q, 2C), 18.30 (q, 2C);

**$^{195}\text{Pt}$  NMR** (86 MHz,  $\text{CD}_2\text{Cl}_2$ , 295 K)  $\delta$  [ppm] = -3539.34 (s, 1Pt);

**IR** (ATR)  $\tilde{\nu}$  [ $\text{cm}^{-1}$ ] = 3224 (w), 2919 (w), 2855 (w), 2185 (m), 1606 (w), 1543 (s), 1377 (w), 1294 (w), 1217 (w), 1144 (w), 1034 (w), 853 (m), 767 (w), 712 (w), 669 (w);

**HR-MS** (MALDI):  $\text{C}_{37}\text{H}_{43}\text{Au}^{35}\text{Cl}_2\text{N}_5^{192}\text{Pt}$  [ $\text{M}-\text{Cl}$ ] $^+$  calcd. 1016.2171, found 1016.2166;  $\text{C}_{37}\text{H}_{43}\text{Au}^{35}\text{Cl}^{37}\text{ClN}_5^{192}\text{Pt}$  [ $\text{M}-\text{Cl}$ ] $^+$  calcd. 1018.2142, found 1018.2182;  $\text{C}_{37}\text{H}_{43}\text{Au}^{37}\text{Cl}_2\text{N}_5^{192}\text{Pt}$  [ $\text{M}-\text{Cl}$ ] $^+$  calcd. 1020.2112, found 1020.2200;  $\text{C}_{37}\text{H}_{43}\text{Au}^{35}\text{Cl}_2\text{N}_5^{194}\text{Pt}$  [ $\text{M}-\text{Cl}$ ] $^+$  calcd. 1018.2188,

found 1018.2182;  $C_{37}H_{43}Au^{35}Cl^{37}N_5^{194}Pt$   $[M-Cl]^+$  calcd. 1020.2158, found 1020.2200;  $C_{37}H_{43}Au^{37}Cl_2N_5^{194}Pt$   $[M-Cl]^+$  calcd. 1022.2129, found 1022.2200;  $C_{37}H_{43}Au^{35}Cl_2N_5^{195}Pt$   $[M-Cl]^+$  calcd. 1019.2209, found 1019.2207;  $C_{37}H_{43}Au^{35}Cl^{37}N_5^{195}Pt$   $[M-Cl]^+$  calcd. 1021.2179, found 1021.2199;  $C_{37}H_{43}Au^{37}Cl_2N_5^{195}Pt$   $[M-Cl]^+$  calcd. 1023.2150, found 1023.2209;  $C_{37}H_{43}Au^{35}Cl_2N_5^{196}Pt$   $[M-Cl]^+$  calcd. 1020.2210, found 1020.2200;  $C_{37}H_{43}Au^{35}Cl^{37}N_5^{196}Pt$   $[M-Cl]^+$  calcd 1022.2181, found 1022.2200;  $C_{37}H_{43}Au^{37}Cl_2N_5^{196}Pt$   $[M-Cl]^+$  calcd. 1024.2151, found 1024.2202;  $C_{37}H_{43}Au^{35}Cl_2N_5^{198}Pt$   $[M-Cl]^+$  calcd. 1022.2240, found 1022.2200;  $C_{37}H_{43}Au^{35}Cl^{37}N_5^{198}Pt$   $[M-Cl]^+$  calcd. 1024.2210, found 1024.2202;  $C_{37}H_{43}Au^{37}Cl_2N_5^{198}Pt$   $[M-Cl]^+$  calcd. 1026.2181, found 1026.2222;

EA calcd. for  $C_{37}H_{43}Cl_3AuN_5Pt$ : C: 42.08, H: 4.10, N: 6.63; found C: 42.25, H: 4.27, N: 6.61.

### 2.2.31 Synthesis of Bis((2,6-diisopropylphenyl)isonitrile)palladium(II) chloride (4a)

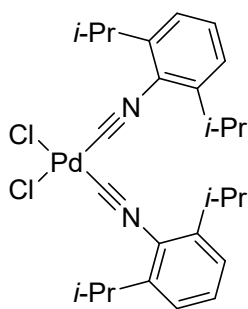

According to **GP8** the reaction was carried out with bis(acetonitrile)palladium chloride (150 mg, 509  $\mu$ mol, 1.00 eq.) and 2,6-diisopropylphenyl isocyanide (104 mg, 509  $\mu$ mol, 1.00 eq.) to obtain title compound as a colorless solid (176 mg, 404  $\mu$ mol, 80 % yield).

Analytical data is in accordance with literature.<sup>1</sup>

$^1H$  NMR (300 MHz,  $CDCl_3$ , 295 K):  $\delta$  [ppm] = 7.38 (t,  $J=7.77$  Hz, 2H,  $2 \times C_{Ar}H$ ), 7.16 (d,  $J=7.78$  Hz, 4H,  $4 \times C_{Ar}H$ ), 3.29 (sept.,  $J=6.91$  Hz, 4H,  $4 \times CH$ ), 1.22 (d,  $J=6.89$  Hz, 24H,  $8 \times CH_3$ ).



## 2.2.32 Synthesis of Bis(mesitylisonitrile)palladium(II) chloride (4b)

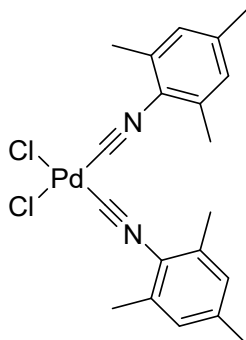

According to **GP8** the reaction was carried out with bis(acetonitrile)palladium chloride (150 mg, 509  $\mu\text{mol}$ , 1.00 eq.) and mesityl isocyanide (104 mg, 509  $\mu\text{mol}$ , 1.00 eq.) to obtain title compound as a colorless solid (176 mg, 404  $\mu\text{mol}$ , 80 % yield).

Analytical data is in accordance with literature.<sup>1</sup>

**<sup>1</sup>H NMR** (300 MHz,  $\text{CDCl}_3$ , 295 K):  $\delta$  [ppm] = 6.94 (s, 4H, 4x $\text{C}_{\text{Ar}}\text{H}$ ), 2.44 (s, 12H, 4x- $\text{CH}_3$ ), 2.32 (s, 6H, 2x- $\text{CH}_3$ ).

## 2.2.33 Synthesis of Gold(I) Palladium(II) Complex 5a

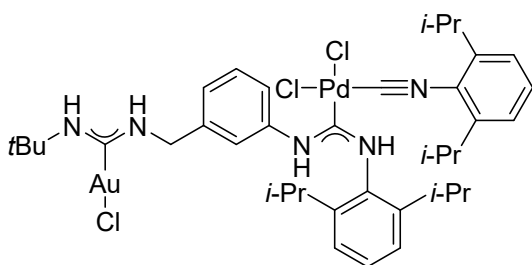

According to **GP9** the reaction was carried out with (((3-aminobenzyl)amino)(*tert*-butylamino)methylene)gold(I) chloride (65.7 mg, 150  $\mu\text{mol}$ , 1.00 eq.) and bis(2,6-diisopropylphenylisonitrile) palladium(II) chloride (82.8 mg, 150  $\mu\text{mol}$ , 1.00 eq.) Title compound was obtained as a colorless solid (123 mg, 124  $\mu\text{mol}$ , 83 % yield).

Analytical data is in accordance with literature.<sup>1</sup>

**<sup>1</sup>H NMR** (500 MHz,  $\text{CD}_2\text{Cl}_2$ , 295 K)  $\delta$  [ppm] = 9.11 – 8.20 (m, 2H, Rotamers A and B, 2x $\text{C}_{\text{Ar}}\text{H}$ ), 8.15 – 7.78 (m, 1H, Rotamers A and B,  $\text{C}_{\text{Ar}}\text{H}$ ), 7.77 – 7.57 (m, 1H, Rotamers A and B,  $\text{C}_{\text{Ar}}\text{H}$ ), 7.41 – 7.24 (m, 6H, Rotamers A and B, 6x $\text{C}_{\text{Ar}}\text{H}$ ), 7.24 – 7.05 (m, 3H, Rotamers A and B, 3x $\text{C}_{\text{Ar}}\text{H}$ ), 7.05 – 6.58 (m, 1H, Rotamers A and B,  $\text{C}_{\text{Ar}}\text{H}$ ), 5.17 – 4.11 (m, 2H, Rotamers

A and B,  $-\underline{\text{CH}_2}-$ ), 3.43 – 2.74 (m, 4H, Rotamers A and B,  $4x\underline{\text{CH}}$ ), 1.53 – 1.38 (m, 9H, Rotamers A, and B,  $3x-\underline{\text{CH}_3}$ ), 1.30 – 1.07 (m, 24H, Rotamers A and B,  $8x-\underline{\text{CH}_3}$ );

### 2.2.34 Synthesis of Gold(I) Palladium(II) Complex 5c

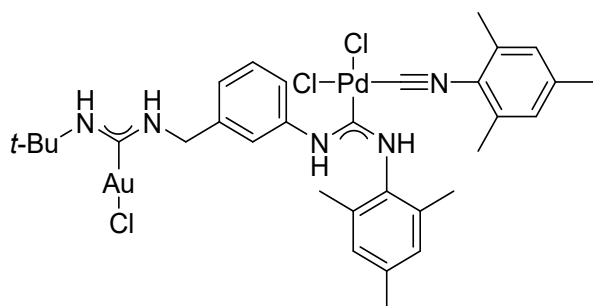

According to **GP9** the reaction was carried out with chloro(dimethyl sulfide)gold(I) (29.5 mg, 100  $\mu\text{mol}$ , 1.00 eq.), *tert*-butyl isocyanide (8.41 mg, 100  $\mu\text{mol}$ , 1.00 eq.), 3-aminobenzylamine (12.2 mg, 100  $\mu\text{mol}$ , 1.00 eq.) and bis(2,4,6-trimethylphenylisonitrile) palladium(II) chloride (46.8 mg, 100  $\mu\text{mol}$ , 1.00 eq.). Title compound was obtained as a colorless solid (70.0 mg, 77.8  $\mu\text{mol}$ , 78 %).

Analytical data is in accordance with literature.<sup>1</sup>

$^1\text{H NMR}$  (400 MHz,  $\text{CD}_2\text{Cl}_2$ , 295 K)  $\delta$  [ppm] = 9.92 – 9.73 (m, 1H, Rotamers A and B,  $\text{C}_{\text{Ar}}\underline{\text{H}}$ ), 9.05 – 8.78 (m, 1H, Rotamers A and B,  $\text{C}_{\text{Ar}}\underline{\text{H}}$ ), 7.95 – 7.85 (m, 1H, Rotamers A and B,  $\text{C}_{\text{Ar}}\underline{\text{H}}$ ), 7.71 – 7.58 (m, 1H, Rotamers A and B,  $\text{C}_{\text{Ar}}\underline{\text{H}}$ ), 7.47 (t,  $J = 5.7$  Hz, 1H, Rotamers A and B,  $\text{C}_{\text{Ar}}\underline{\text{H}}$ ), 7.32 – 7.11 (m, 3H, Rotamers A and B,  $3x\text{C}_{\text{Ar}}\underline{\text{H}}$ ), 7.05 – 6.95 (m, 2H, Rotamers A and B,  $2x\text{C}_{\text{Ar}}\underline{\text{H}}$ ), 6.87 – 6.73 (m, 3H, Rotamers A and B,  $3x\text{C}_{\text{Ar}}\underline{\text{H}}$ ), 5.16 – 4.65 (m, 2H, Rotamers A and B,  $-\underline{\text{CH}_2}-$ ), 2.45 – 2.21 (m, 18H, Rotamers A and B,  $6x-\underline{\text{CH}_3}$ ), 1.47 – 1.34 (m, 9H, Rotamers A and B,  $3x-\underline{\text{CH}_3}$ );

### 2.2.35 Synthesis of Gold(I) Palladium(II) Complex 5c

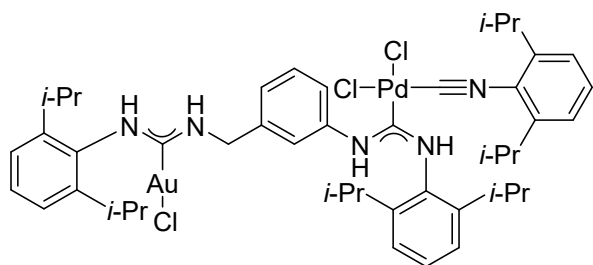

According to **GP9** the reaction was carried out with (((3-aminobenzyl)amino)((2,6-diisopropylphenyl)amino)methylene)gold(I) chloride (81.2 mg, 150  $\mu\text{mol}$ , 1.00 eq.) and bis(2,6-diisopropylphenylisonitrile) palladium(II) chloride (82.8 mg, 150  $\mu\text{mol}$ , 1.00 eq.) Title compound was obtained as a colorless solid (128 mg, 117  $\mu\text{mol}$ , 78 % yield).

Analytical data is in accordance with literature.<sup>1</sup>

**<sup>1</sup>H NMR** (600 MHz,  $\text{CD}_2\text{Cl}_2$ , 295 K)  $\delta$  [ppm] = 9.37 – 8.78 (m, 2H, Rotamers A and B, 2x $\text{C}_{\text{ArH}}$ ), 8.19 – 7.83 (m, 1H, Rotamers A and B,  $\text{C}_{\text{ArH}}$ ), 7.83 – 7.52 (m, 1H, Rotamers A and B,  $\text{C}_{\text{ArH}}$ ), 7.53 – 7.02 (m, 12H, Rotamers A and B, 12x $\text{C}_{\text{ArH}}$ ), 6.91 – 6.50 (m, 1H, Rotamers A and B,  $\text{C}_{\text{ArH}}$ ), 5.18 – 4.51 (m, 2H, Rotamers A and B,  $-\text{CH}_2-$ ), 3.49 – 2.81 (m, 6H, Rotamers A and B, 2x- $\text{CH}_3$ ), 1.34 – 0.91 (m, 36H, Rotamers A and B, 12x- $\text{CH}_3$ );

### 2.2.36 Synthesis of Gold(I) Palladium(II) Complex 5d

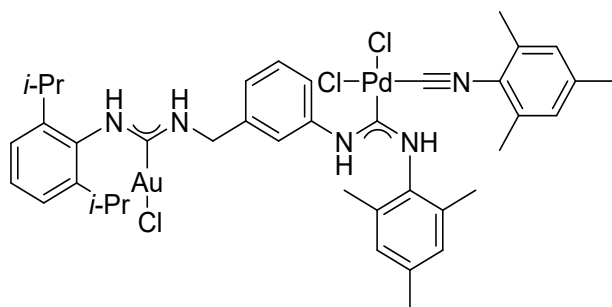

According to **GP9** the reaction was carried out with chloro(dimethyl sulfide)gold(I) (29.5 mg, 100  $\mu\text{mol}$ , 1.00 eq.), 2,6-diisopropylphenyl isocyanide (18.8 mg, 100  $\mu\text{mol}$ , 1.00 eq.), 3-aminobenzylamine (12.2 mg, 100  $\mu\text{mol}$ , 1.00 eq.) and bis(2,4,6-trimethylphenylisonitrile) palladium(II) chloride (46.8 mg, 100  $\mu\text{mol}$ , 1.00 eq.). Title compound was obtained as a colorless solid (72.0 mg, 71.3  $\mu\text{mol}$ , 71 %).

Analytical data is in accordance with literature.<sup>1</sup>

**<sup>1</sup>H NMR** (600 MHz,  $\text{CD}_2\text{Cl}_2$ , 295 K)  $\delta$  [ppm] = 9.28 – 8.28 (m, 2H, Rotamers A and B,  $\text{C}_{\text{ArH}}$ ), 8.01 – 7.66 (m, 1H, Rotamers A and B,  $\text{C}_{\text{ArH}}$ ), 7.59 – 7.24 (m, 5H, Rotamers A and B, 5x $\text{C}_{\text{ArH}}$ ), 7.23 – 6.88 (m, 6H, Rotamers A and B, 6x $\text{C}_{\text{ArH}}$ ), 6.87 – 6.15 (m, 1H, Rotamers A and B,  $\text{C}_{\text{ArH}}$ ), 5.34 – 4.72 (m, 2H, Rotamers A and B,  $-\text{CH}_2-$ ), 3.46 – 3.00 (m, 2H, Rotamers A and B, 2x $\text{CH}$ ), 2.65 – 2.10 (m, 18H, Rotamers A and B, 6x- $\text{CH}_3$ ), 1.50 – 0.99 (m, 12H, Rotamers A and B, 4x- $\text{CH}_3$ ).

### 2.2.37 Synthesis of Gold(I) Palladium(II) Complex 5e

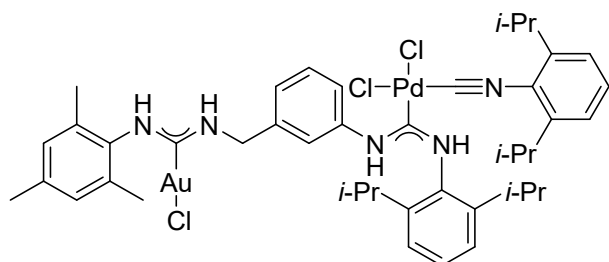

According to **GP9** the reaction was carried out with (((3-aminobenzyl)amino)(mesitylamino)methyl)gold(I) chloride (75.0 mg, 150  $\mu\text{mol}$ , 1.00 eq.) and bis(2,6-diisopropylphenylisonitrile) palladium(II) chloride (82.8 mg, 150  $\mu\text{mol}$ , 1.00 eq.) Title compound was obtained as a colorless solid (126 mg, 120  $\mu\text{mol}$ , 80 % yield).

Analytical data is in accordance with literature.<sup>1</sup>

**$^1\text{H NMR}$**  (600 MHz,  $\text{CD}_2\text{Cl}_2$ , 295 K)  $\delta$  [ppm] = 9.17 (s, 1H, Rotamer A,  $\text{C}_{\text{Ar}}\text{H}$ ), 8.87 (s, 1H, Rotamer B,  $\text{C}_{\text{Ar}}\text{H}$ ), 8.18 – 7.55 (m, 3H, Rotamers A and B,  $3\times\text{C}_{\text{Ar}}\text{H}$ ), 7.51 – 7.08 (m, 9H, Rotamers A and B,  $9\times\text{C}_{\text{Ar}}\text{H}$ ), 6.96 – 6.81 (m, 3H, Rotamers A and B,  $3\times\text{C}_{\text{Ar}}\text{H}$ ), 6.69 – 6.52 (m, 1H, Rotamers A and B,  $\text{C}_{\text{Ar}}\text{H}$ ), 5.18 – 4.65 (m, 2H, Rotamers A and B,  $-\text{CH}_2-$ ), 3.40 – 2.79 (m, 4H, Rotamers A and B,  $4\times\text{CH}$ ), 2.40 – 2.01 (m, 9H, Rotamers A and B,  $3\times\text{-CH}_3$ ), 1.34 – 1.00 (m, 24H, Rotamers A and B,  $8\times\text{-CH}_3$ ).

### 2.2.38 Synthesis of Gold(I) Palladium(II) Complex 5f

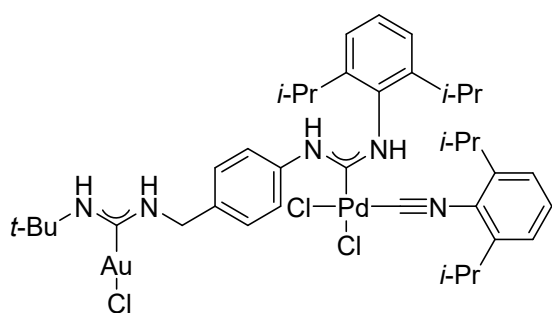

According to **GP9** the reaction was carried out with (((4-aminobenzyl)amino)(*tert*-butylamino)methylene)gold(I) chloride (65.7 mg, 150  $\mu\text{mol}$ , 1.00 eq.) and bis(2,6-diisopropylphenylisonitrile) palladium(II) chloride (82.8 mg, 150  $\mu\text{mol}$ , 1.00 eq.) Title compound was obtained as a colorless solid (136 mg, 137  $\mu\text{mol}$ , 92 % yield).

Analytical data is in accordance with literature.<sup>1</sup>

**<sup>1</sup>H NMR** (600 MHz, THF-d<sub>8</sub>, 295 K) δ [ppm] = 10.84 (s, 1H, C<sub>Ar</sub>H), 9.17 (s, 1H, C<sub>Ar</sub>H), 8.84 (t, *J* = 6.5 Hz, 1H, C<sub>Ar</sub>H), 8.44 (s, 1H, C<sub>Ar</sub>H), 8.14 (d, *J* = 6.9 Hz, 2H, 2xC<sub>Ar</sub>H), 7.96 (d, *J* = 7.4 Hz, 2H, 2xC<sub>Ar</sub>H), 7.75 (t, *J* = 7.8 Hz, 1H, C<sub>Ar</sub>H), 7.70 (t, *J* = 8.5 Hz, 1H, C<sub>Ar</sub>H), 7.62 (d, *J* = 7.7 Hz, 3H, 3xC<sub>Ar</sub>H), 7.60 – 7.58 (m, 3H, 3xC<sub>Ar</sub>H), 5.17 (d, *J* = 6.1 Hz, 2H, -CH<sub>2</sub>-), 3.80 – 3.33 (m, 4H, 4xCH), 1.81 (d, *J* = 1.7 Hz, 9H, 3x-CH<sub>3</sub>), 1.60 – 1.46 (m, 24H, 8x-CH<sub>3</sub>).

### 2.2.39 Synthesis of Gold(I) Palladium(II) Complex 5g

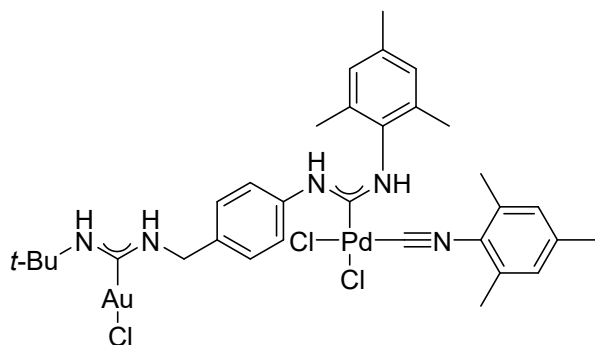

According to **GP9** the reaction was carried out with chloro(dimethyl sulfide)gold(I) (29.5 mg, 100 μmol, 1.00 eq.), *tert*-butyl isocyanide (8.41 mg, 100 μmol, 1.00 eq.), 4-aminobenzylamine (12.2 mg, 100 μmol, 1.00 eq.) and bis(2,4,6-trimethylphenylisocyanide) palladium(II) chloride (46.8 mg, 100 μmol, 1.00 eq.). Title compound was obtained as a colorless solid (66.0 mg, 72.8 μmol, 73 %).

Analytical data is in accordance with literature.<sup>1</sup>

**<sup>1</sup>H NMR** (400 MHz, CD<sub>2</sub>Cl<sub>2</sub>, 295 K) δ [ppm] = 9.34 (s, 1H, C<sub>Ar</sub>H), 8.00 (d, *J* = 13.6 Hz, 2H, 2xC<sub>Ar</sub>H), 7.92 – 7.72 (m, 1H, C<sub>Ar</sub>H), 7.64 (d, *J* = 8.4 Hz, 2H, 2xC<sub>Ar</sub>H), 7.54 (s, 1H, C<sub>Ar</sub>H), 7.39 (d, *J* = 8.4 Hz, 2H, 2xC<sub>Ar</sub>H), 7.01 (s, 3H, 3xC<sub>Ar</sub>H), 6.85 (s, 3H, 3xC<sub>Ar</sub>H), 4.66 (d, *J* = 6.1 Hz, 2H, -CH<sub>2</sub>-), 2.33 (s, 6H, 2x-CH<sub>3</sub>), 2.30 (s, 3H, -CH<sub>3</sub>), 2.25 (s, 3H, -CH<sub>3</sub>), 2.14 (s, 6H, 2x-CH<sub>3</sub>), 1.47 (s, 9H, 3x-CH<sub>3</sub>).

## 2.2.40 Synthesis of Gold(I) Palladium(II) Complex 5h

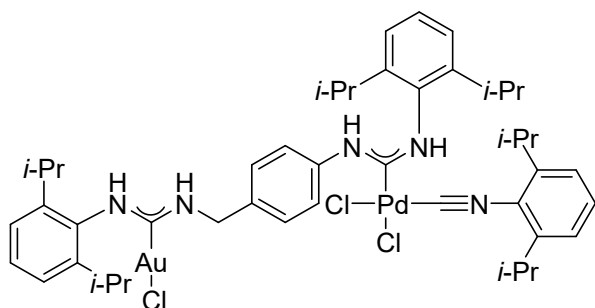

According to **GP9** the reaction was carried out with (((4-aminobenzyl)amino)((2,6-diisopropylphenyl)amino)methylene)gold(I) chloride (81.2 mg, 150  $\mu\text{mol}$ , 1.00 eq.) and bis(2,6-diisopropylphenylisocyanide) palladium(II) chloride (82.8 mg, 150  $\mu\text{mol}$ , 1.00 eq.) Title compound was obtained as a colorless solid (122 mg, 112  $\mu\text{mol}$ , 74 % yield).

Analytical data is in accordance with literature.<sup>1</sup>

<sup>1</sup>H NMR (400 MHz, CD<sub>2</sub>Cl<sub>2</sub>, 295 K)  $\delta$  [ppm] = 9.38 – 8.05 (m, 2H, Rotamers A and B, 2xC<sub>Ar</sub>H), 7.64 (d,  $J$  = 8.4 Hz, 2H, Rotamer A, 2xC<sub>Ar</sub>H), 7.48 (d,  $J$  = 8.2 Hz, 2H, Rotamer B, 2xC<sub>Ar</sub>H), 7.45 – 7.35 (m, 2H, Rotamers A and B, 2xC<sub>Ar</sub>H), 7.35 – 7.21 (m, 5H, Rotamers A and B, 5xC<sub>Ar</sub>H), 7.21 – 7.02 (m, 5H, Rotamers A and B, 5xC<sub>Ar</sub>H), 6.99 – 6.43 (m, 1H, Rotamers A and B, C<sub>Ar</sub>H), 6.09 (t,  $J$  = 6.2 Hz, 1H, Rotamer A, C<sub>Ar</sub>H), 5.97 (t,  $J$  = 6.0 Hz, 1H, Rotamer B, C<sub>Ar</sub>H), 4.77 (d,  $J$  = 6.2 Hz, 2H, Rotamer A, -CH<sub>2</sub>-), 4.65 (d,  $J$  = 6.0 Hz, 2H, Rotamer B, -CH<sub>2</sub>-), 3.40 – 2.79 (m, 6H, Rotamers A and B, 2x-CH<sub>3</sub>), 1.24 – 0.85 (m, 36H, Rotamers A and B, 12x-CH<sub>3</sub>).

## 2.2.41 Synthesis of Gold(I) Palladium(II) Complex 5i

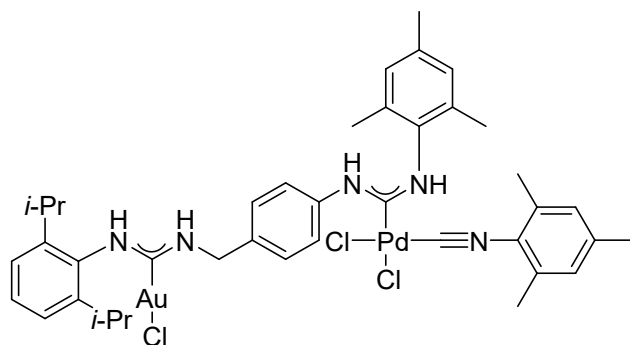

According to **GP9** the reaction was carried out with chloro(dimethyl sulfide)gold(I) (29.5 mg, 100  $\mu\text{mol}$ , 1.00 eq.), 2,6-diisopropylphenyl isocyanide (14.6 mg, 100  $\mu\text{mol}$ , 1.00 eq.), 4-aminobenzylamine (12.2 mg, 100  $\mu\text{mol}$ , 1.00 eq.) and bis(2,4,6-trimethylphenylisocyanide)

palladium(II) chloride (46.8 mg, 100  $\mu\text{mol}$ , 1.00 eq.). Title compound was obtained as a colorless solid (81.0 mg, 80.2  $\mu\text{mol}$ , 80 %).

Analytical data is in accordance with literature.<sup>1</sup>

**<sup>1</sup>H NMR** (600 MHz,  $\text{CD}_2\text{Cl}_2$ , 295 K)  $\delta$  [ppm] = 9.47 (s, 1H, Rotamer A,  $\text{C}_{\text{Ar}}\text{H}$ ), 9.21 (s, 1H, Rotamer B,  $\text{C}_{\text{Ar}}\text{H}$ ), 8.37 – 8.00 (m, 1H, Rotamers A and B,  $\text{C}_{\text{Ar}}\text{H}$ ), 7.72 (d,  $J = 8.2$  Hz, 1H, Rotamers A and B,  $\text{C}_{\text{Ar}}\text{H}$ ), 7.48 (s, 1H, Rotamers A and B,  $\text{C}_{\text{Ar}}\text{H}$ ), 7.42 – 7.28 (m, 3H, Rotamers A and B,  $3 \times \text{C}_{\text{Ar}}\text{H}$ ), 7.25 – 7.08 (m, 3H, Rotamers A and B,  $3 \times \text{C}_{\text{Ar}}\text{H}$ ), 7.02 (s, 2H, Rotamers A and B,  $2 \times \text{C}_{\text{Ar}}\text{H}$ ), 6.88 (m, 2H, Rotamers A and B,  $2 \times \text{C}_{\text{Ar}}\text{H}$ ), 6.25 (t,  $J = 6.3$  Hz, 1H, Rotamer A,  $\text{C}_{\text{Ar}}\text{H}$ ), 6.20 (t,  $J = 6.4$  Hz, 1H, Rotamer B,  $\text{C}_{\text{Ar}}\text{H}$ ) 5.11 – 4.71 (m, 2H, Rotamers A and B,  $-\text{CH}_2-$ ), 3.23 – 3.18 (m, 2H, Rotamer B,  $2 \times \text{CH}$ ), 3.16 – 2.99 (m, 2H, Rotamer A,  $2 \times \text{CH}$ ), 2.50 – 2.20 (m, 18H, Rotamers A and B,  $6 \times \text{-CH}_3$ ), 1.23 – 0.94 (m, 12H, Rotamers A and B,  $4 \times \text{-CH}_3$ ).

## 2.2.42 Synthesis of Gold(I) Palladium(II) Complex 5j

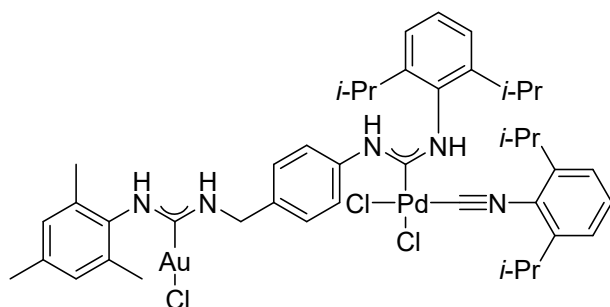

According to **GP9** the reaction was carried out with (((4-aminobenzyl)amino)(mesitylamino)methyl)gold(I) chloride (75.0 mg, 150  $\mu\text{mol}$ , 1.00 eq.) and bis(2,6-diisopropylphenylisonitrile) palladium(II) chloride (82.8 mg, 150  $\mu\text{mol}$ , 1.00 eq.) Title compound was obtained as a colorless solid (131 mg, 120  $\mu\text{mol}$ , 83 % yield).

Analytical data is in accordance with literature.<sup>1</sup>

**<sup>1</sup>H NMR** (700 MHz,  $\text{CD}_2\text{Cl}_2$ , 295 K)  $\delta$  [ppm] = 9.51 – 8.43 (m, 2H, Rotamers A and B,  $2 \times \text{C}_{\text{Ar}}\text{H}$ ), 7.65 (m, 2H, Rotamers A and B,  $2 \times \text{C}_{\text{Ar}}\text{H}$ ), 7.51 – 7.15 (m, 7H, Rotamers A and B,  $2 \times \text{C}_{\text{Ar}}\text{H}$ ), 7.09 (m, 2H, Rotamers A and B,  $2 \times \text{C}_{\text{Ar}}\text{H}$ ), 6.88 – 6.70 (m, 2H, Rotamers A and B,  $2 \times \text{C}_{\text{Ar}}\text{H}$ ), 6.25 – 5.90 (m, 1H, Rotamers A and B,  $\text{C}_{\text{Ar}}\text{H}$ ), 4.87 – 4.76 (d,  $J = 5.9$  Hz, 2H, Rotamer A,  $-\text{CH}_2-$ ), 4.73 (d,  $J = 5.9$  Hz, 2H, Rotamer B,  $-\text{CH}_2-$ ), 3.37 – 3.20 (m, 2H, Rotamers A and B,  $2 \times \text{CH}$ ), 3.01 (m, 2H, Rotamers A and B,  $2 \times \text{CH}$ ), 2.23 – 1.99 (m, 9H, Rotamers A and B,  $3 \times \text{-CH}_3$ ), 1.31 – 0.98 (m, 24H, Rotamers A and B,  $8 \times \text{-CH}_3$ ).

### 3 NMR Spectra

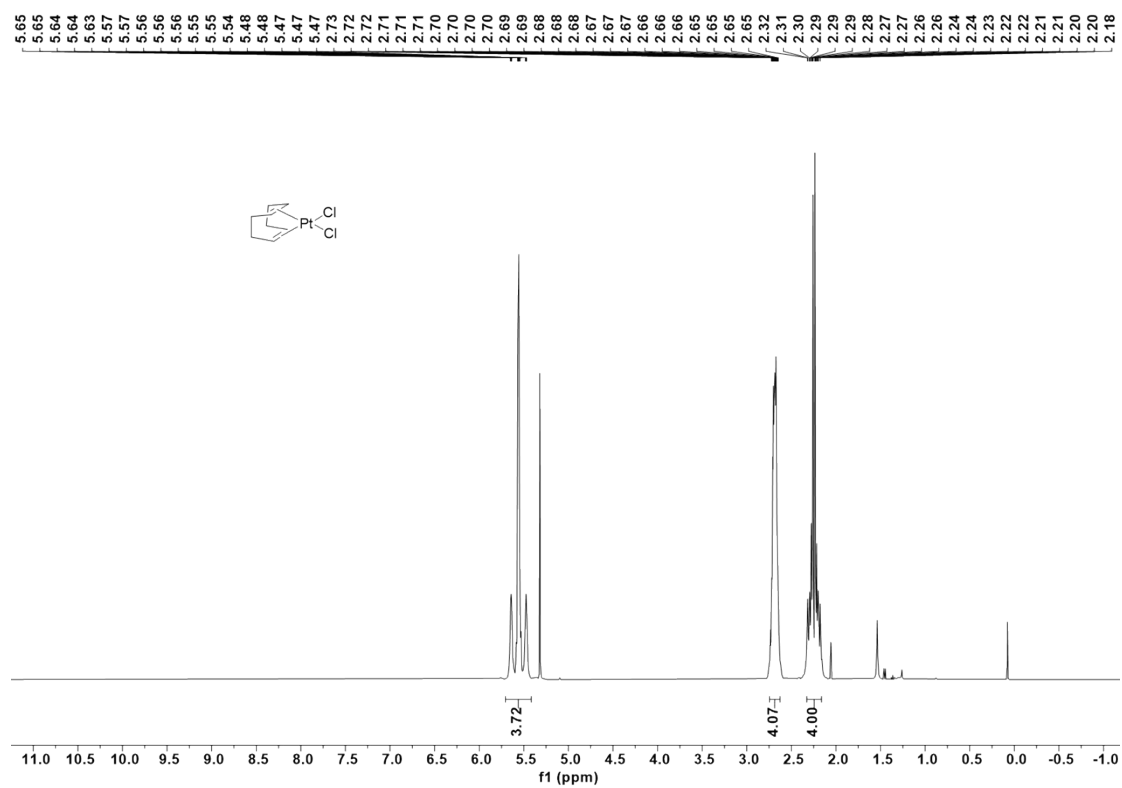

Figure S1.  $^1\text{H}$  NMR of  $[\text{PtCl}_2(\text{COD})]$  in  $\text{CD}_2\text{Cl}_2$  (400 MHz, 295K).

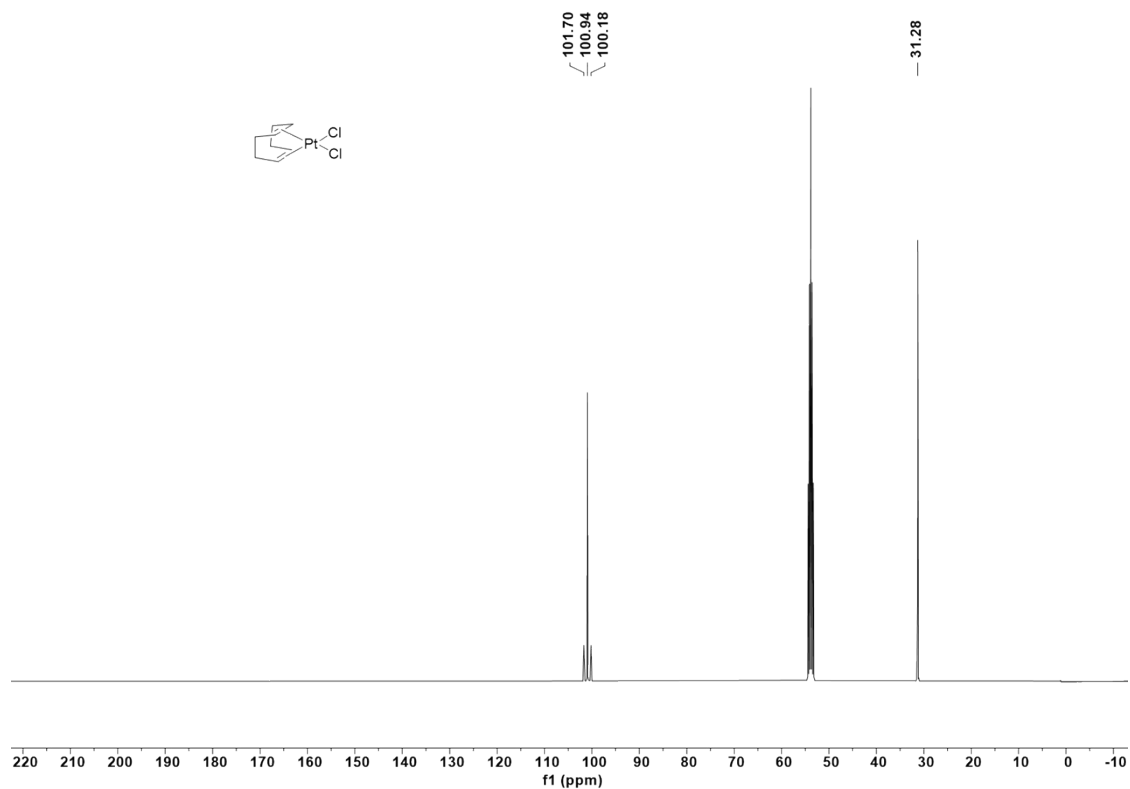



**Figure S2.**  $^{13}\text{C}$  NMR of  $[\text{PtCl}_2(\text{COD})]$  in  $\text{CD}_2\text{Cl}_2$  (101 MHz, 295 K).

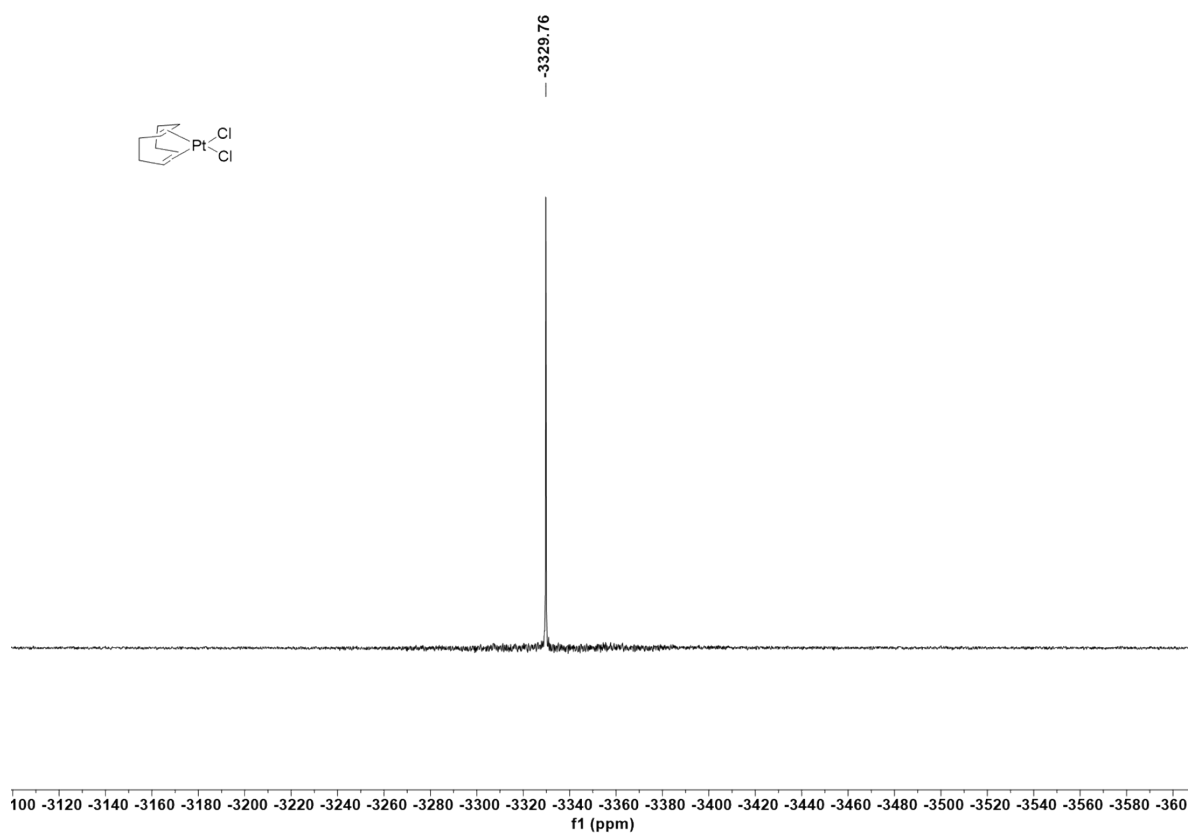

**Figure S3.**  $^{195}\text{Pt}$  NMR of  $[\text{PtCl}_2(\text{COD})]$  in  $\text{CD}_2\text{Cl}_2$  (86 MHz, 295 K).

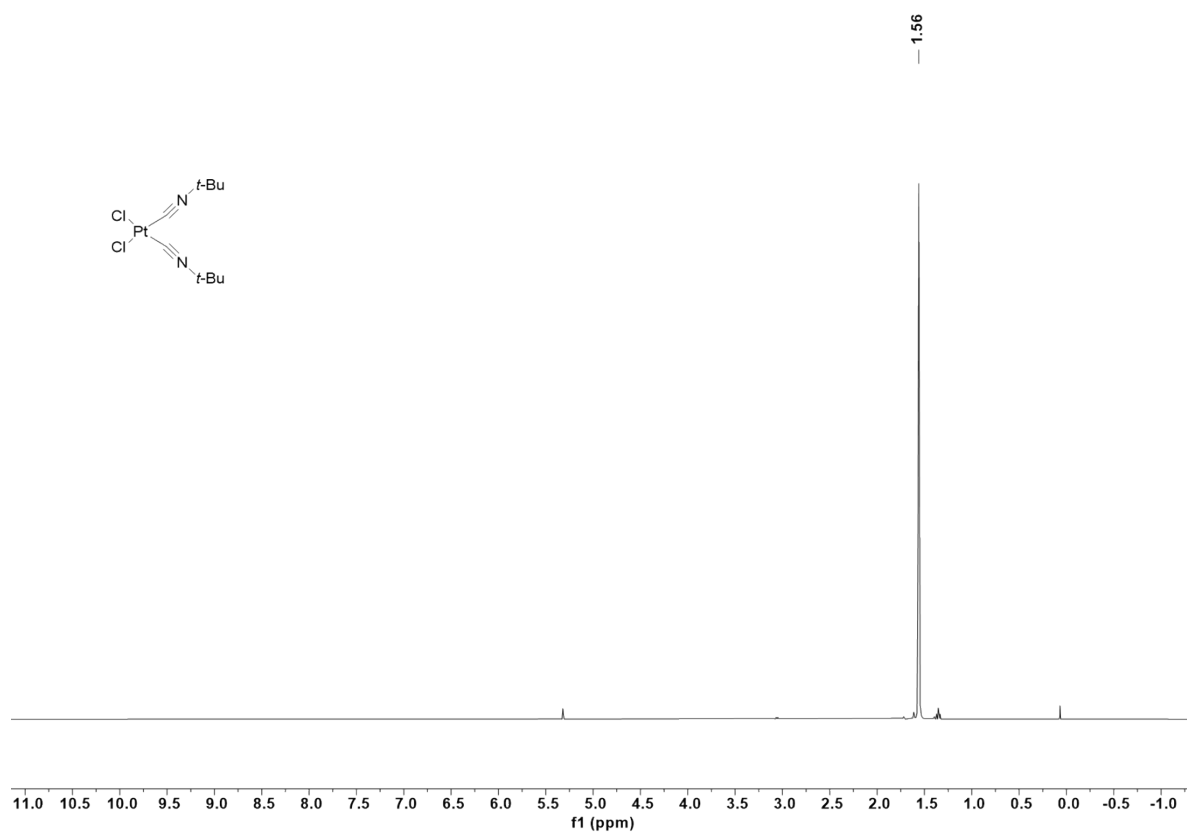

**Figure S4.**  $^1\text{H}$  NMR of **1a** in  $\text{CD}_2\text{Cl}_2$  (400 MHz, 295 K).

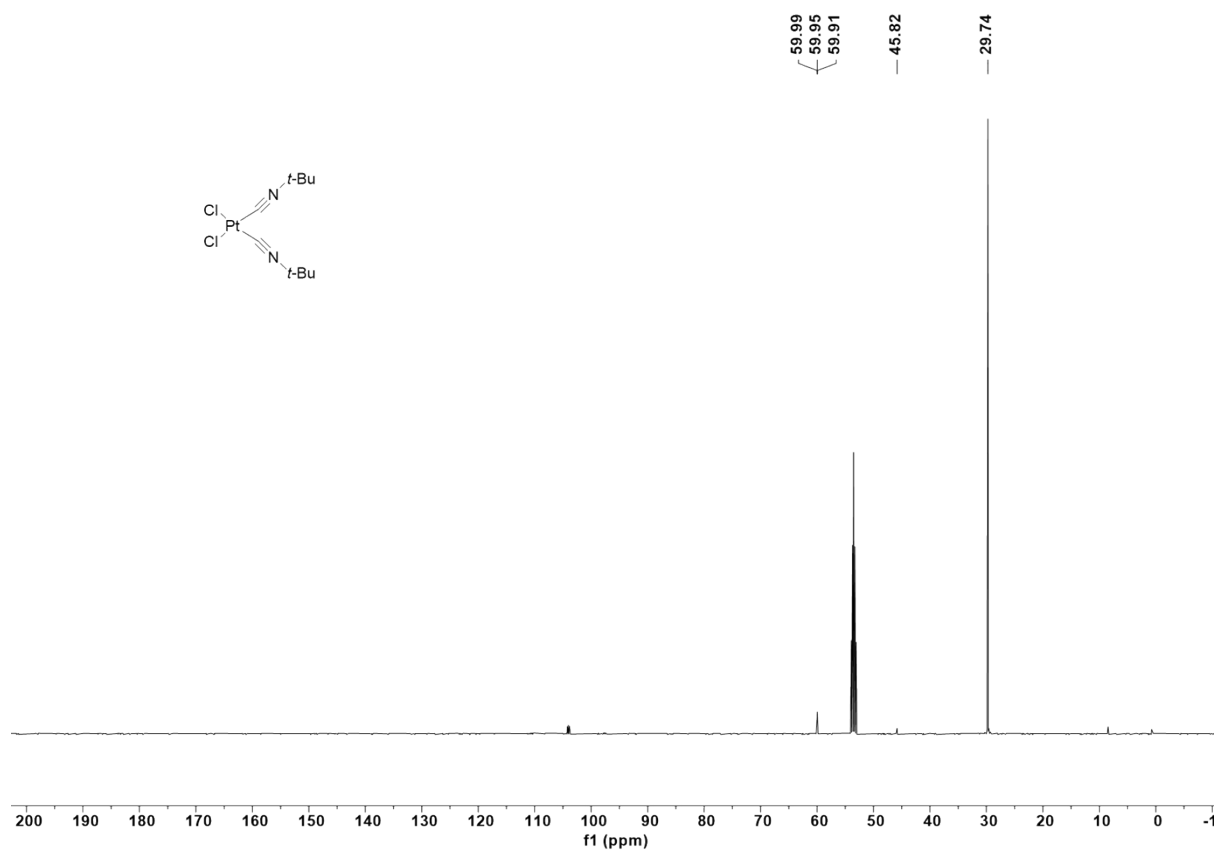

**Figure S5.**  $^{13}\text{C}$  NMR of **1a** in  $\text{CD}_2\text{Cl}_2$  (126 MHz, 295 K).

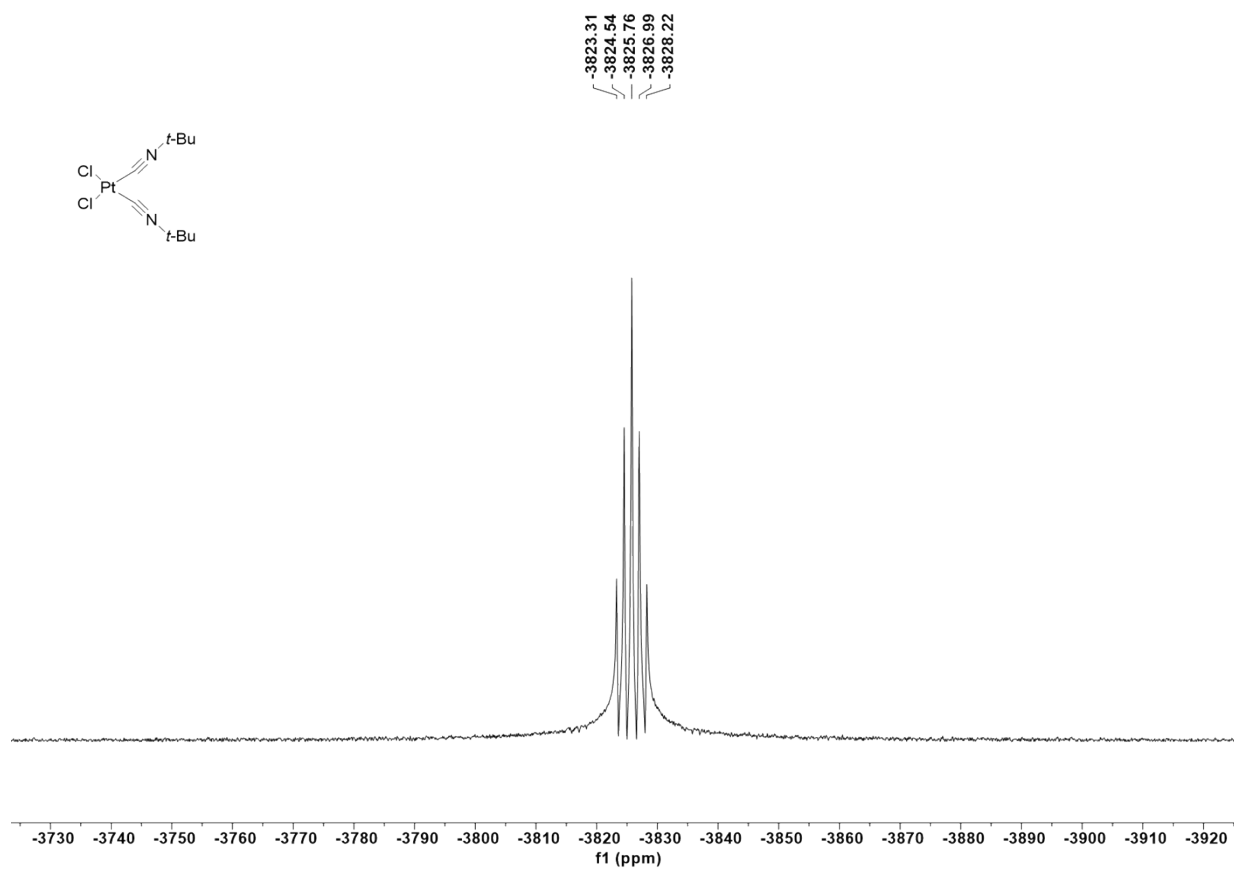

Figure S6.  $^{195}\text{Pt}$  NMR of **1a** in  $\text{CD}_2\text{Cl}_2$  (86 MHz, 295K).

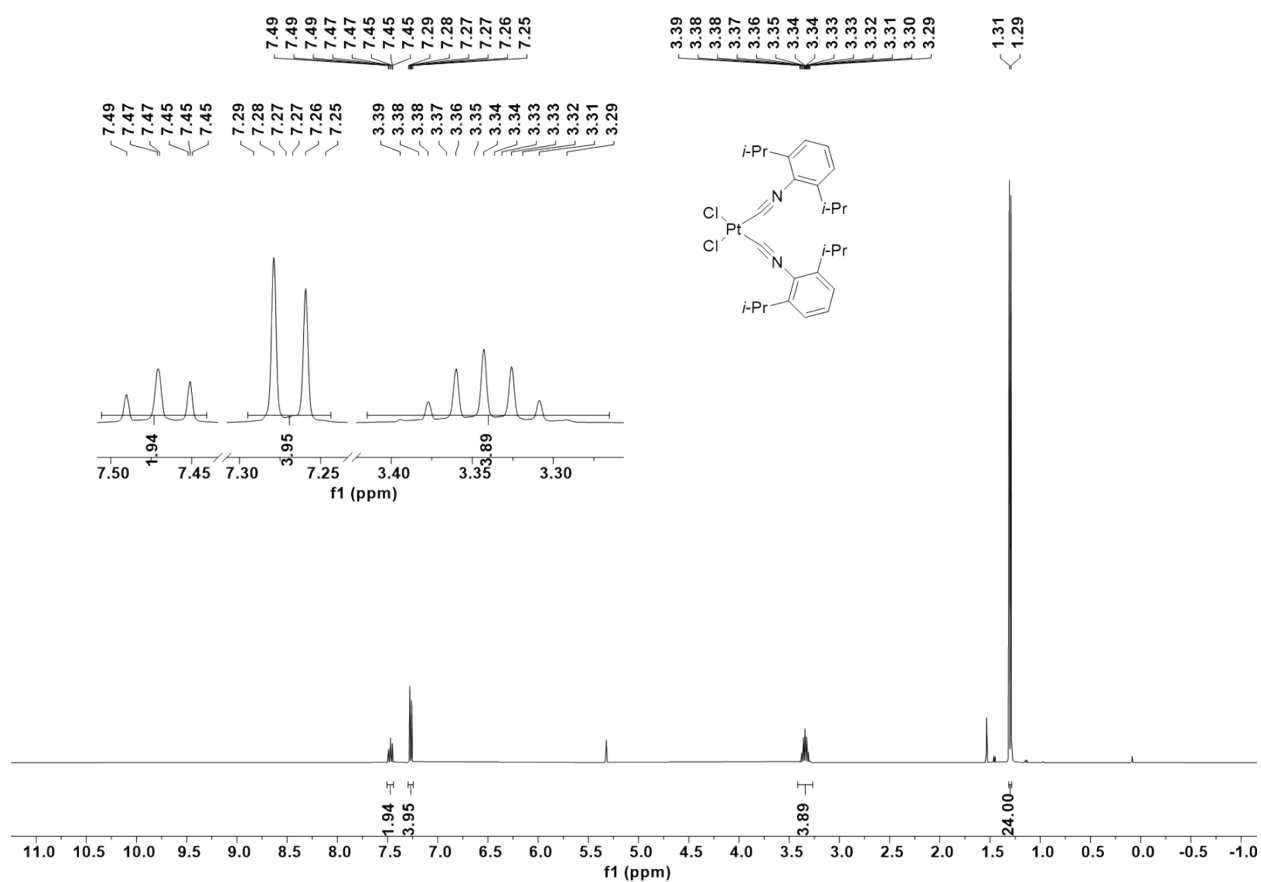

Figure S7.  $^1\text{H}$  NMR of **1b** in  $\text{CD}_2\text{Cl}_2$  (400MHz, 295K).

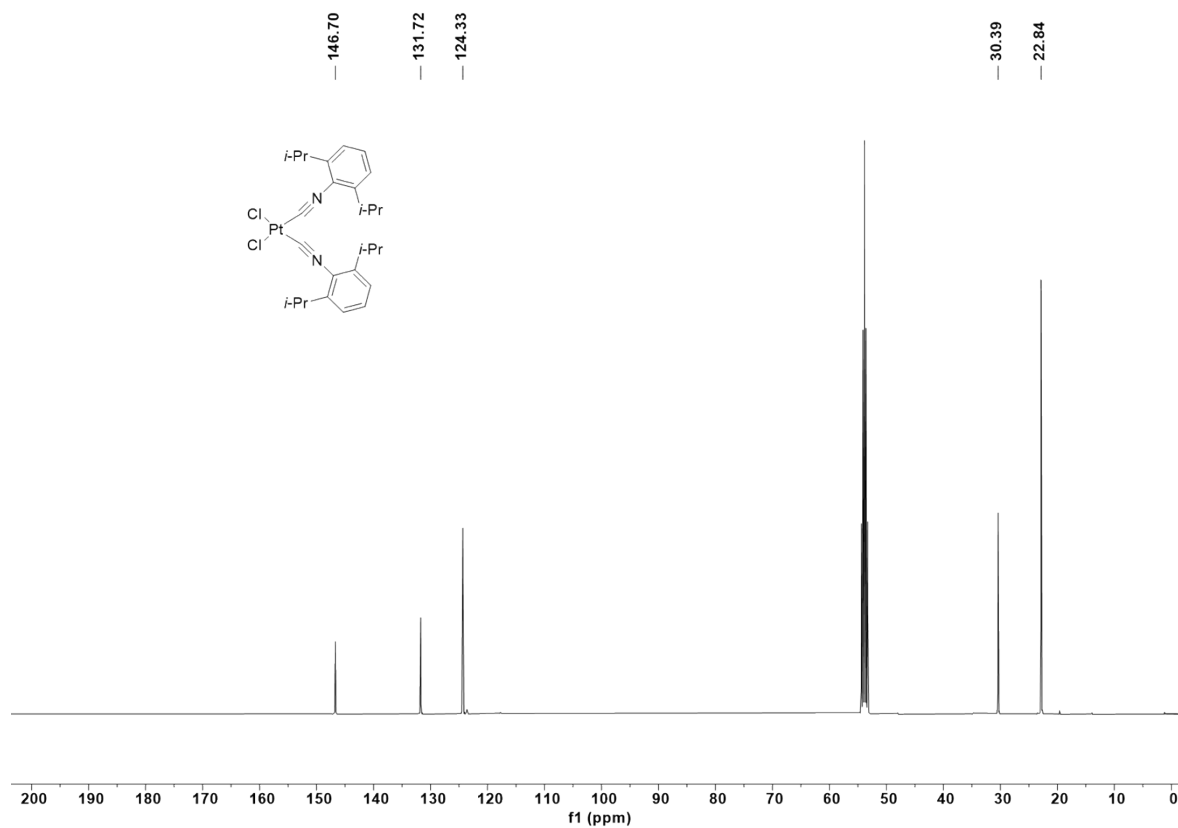

**Figure S8.**  $^{13}\text{C}$  NMR of **1b** in  $\text{CD}_2\text{Cl}_2$  (101 MHz, 295K).

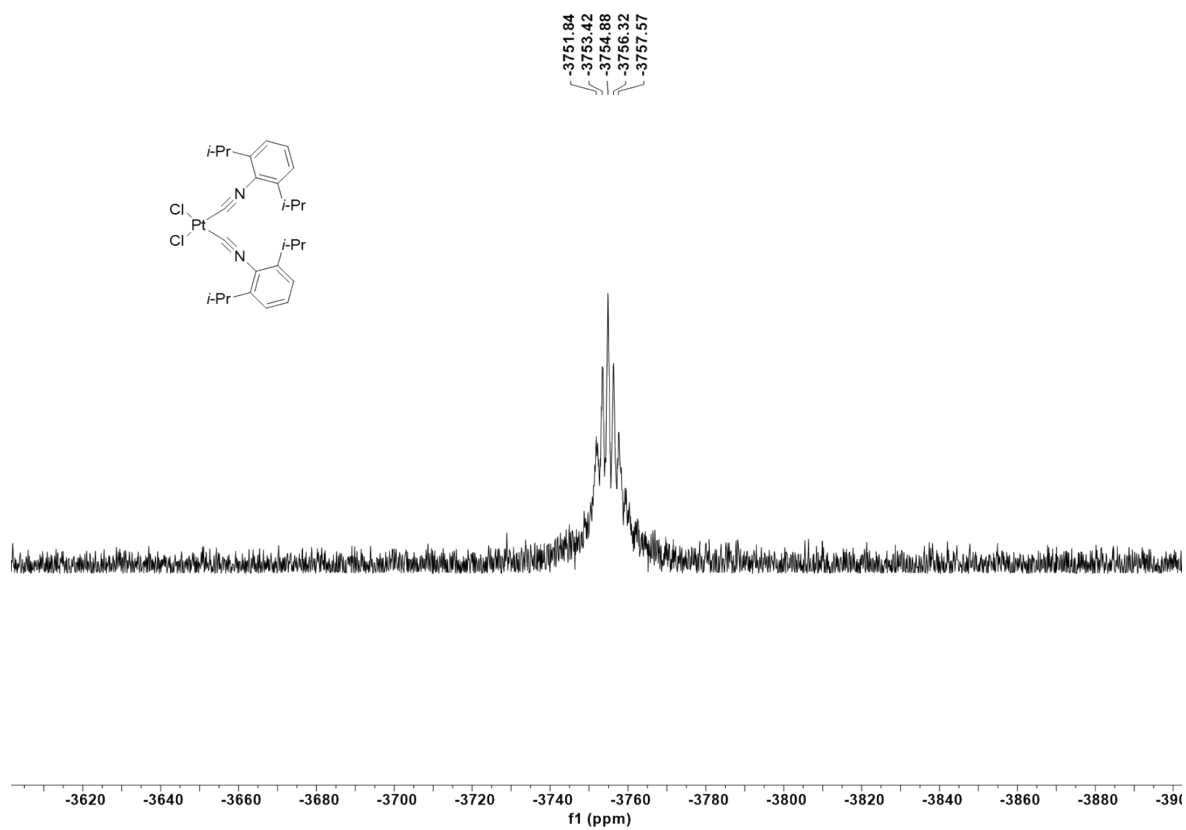

**Figure S9.**  $^{195}\text{Pt}$  NMR of **1b** in  $\text{CD}_2\text{Cl}_2$  (86 MHz, 295K).

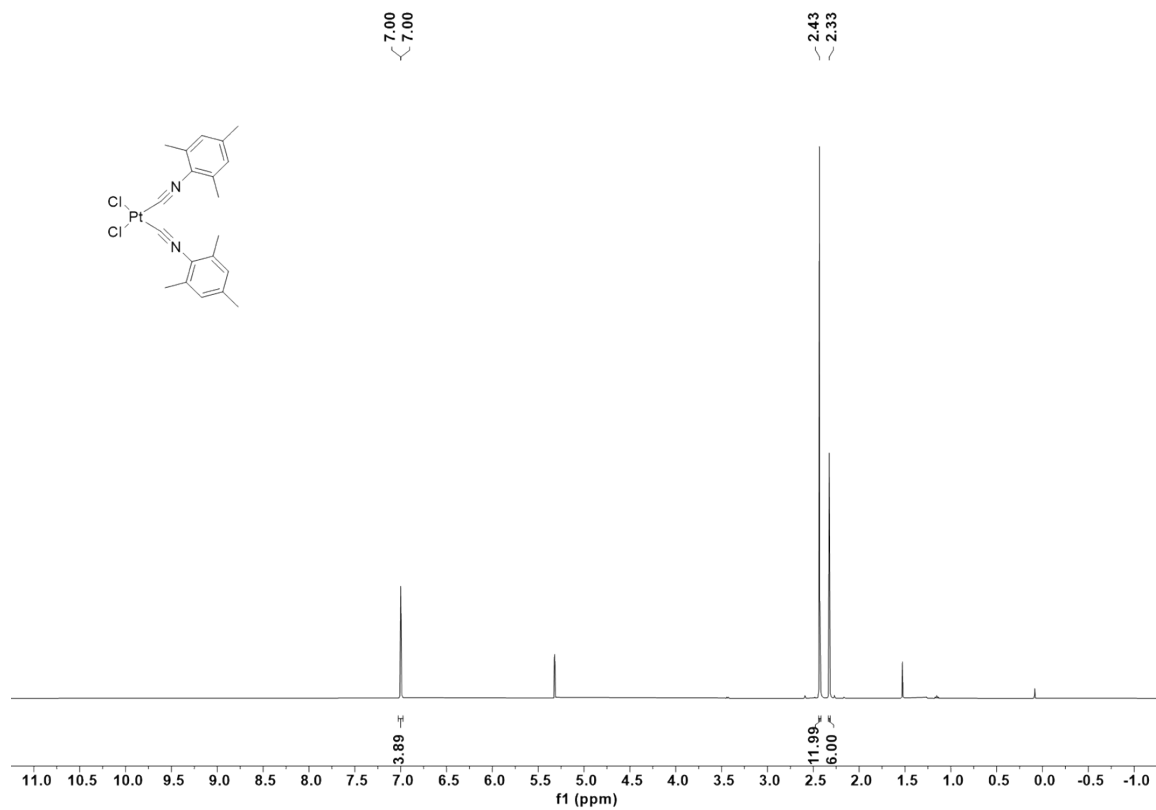

**Figure S10.**  $^1\text{H}$  NMR of **1c** in  $\text{CD}_2\text{Cl}_2$  (400 MHz, 295K).

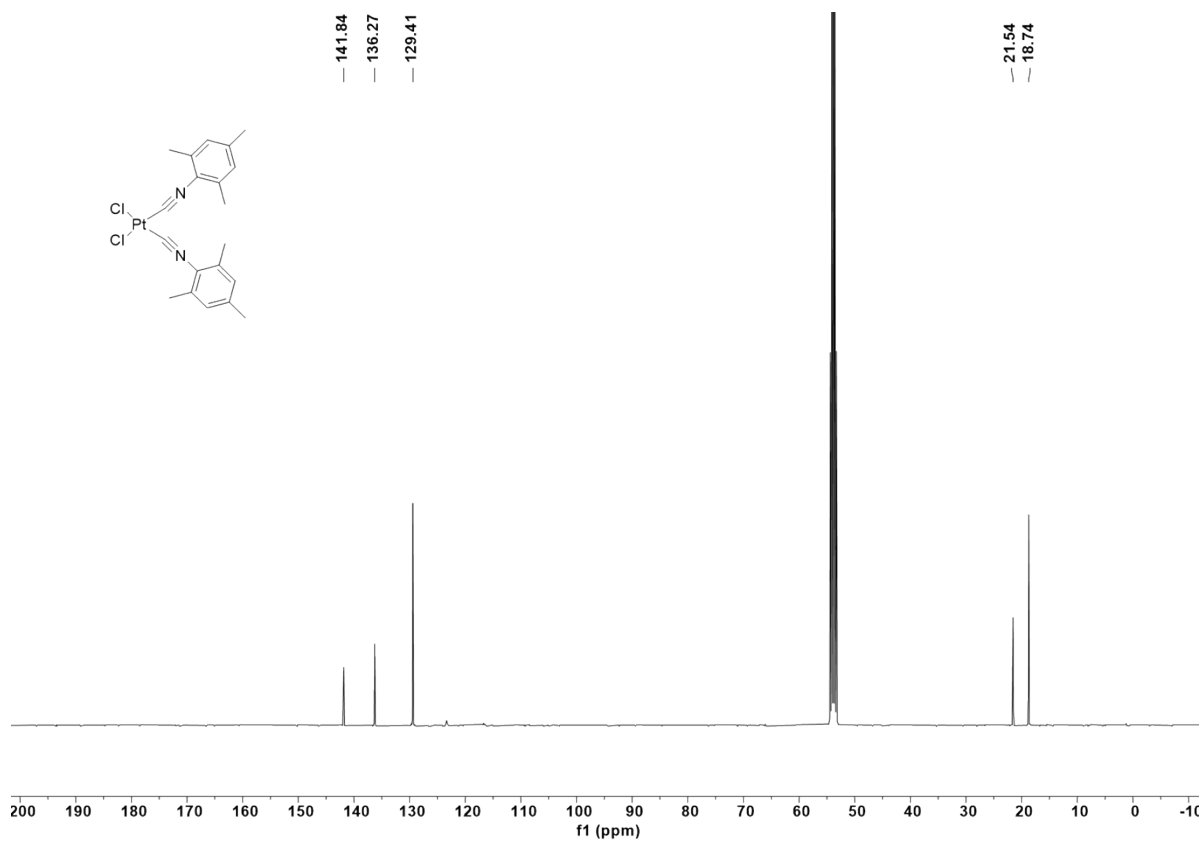

**Figure S11.**  $^{13}\text{C}$  NMR of **1c** in  $\text{CD}_2\text{Cl}_2$  (101 MHz, 295K).

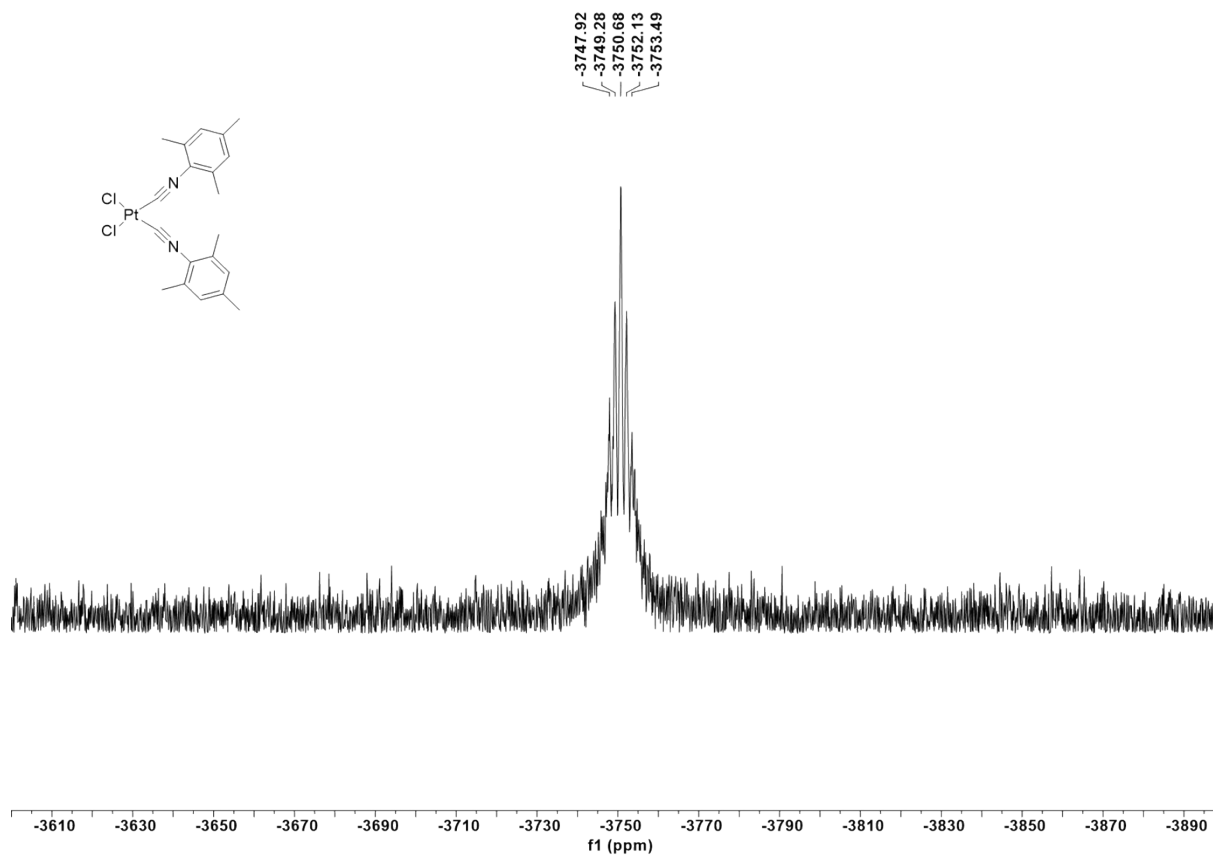

**Figure S12.**  $^{195}\text{Pt}$  NMR of **1c** in  $\text{CD}_2\text{Cl}_2$  (86 MHz, 295K).

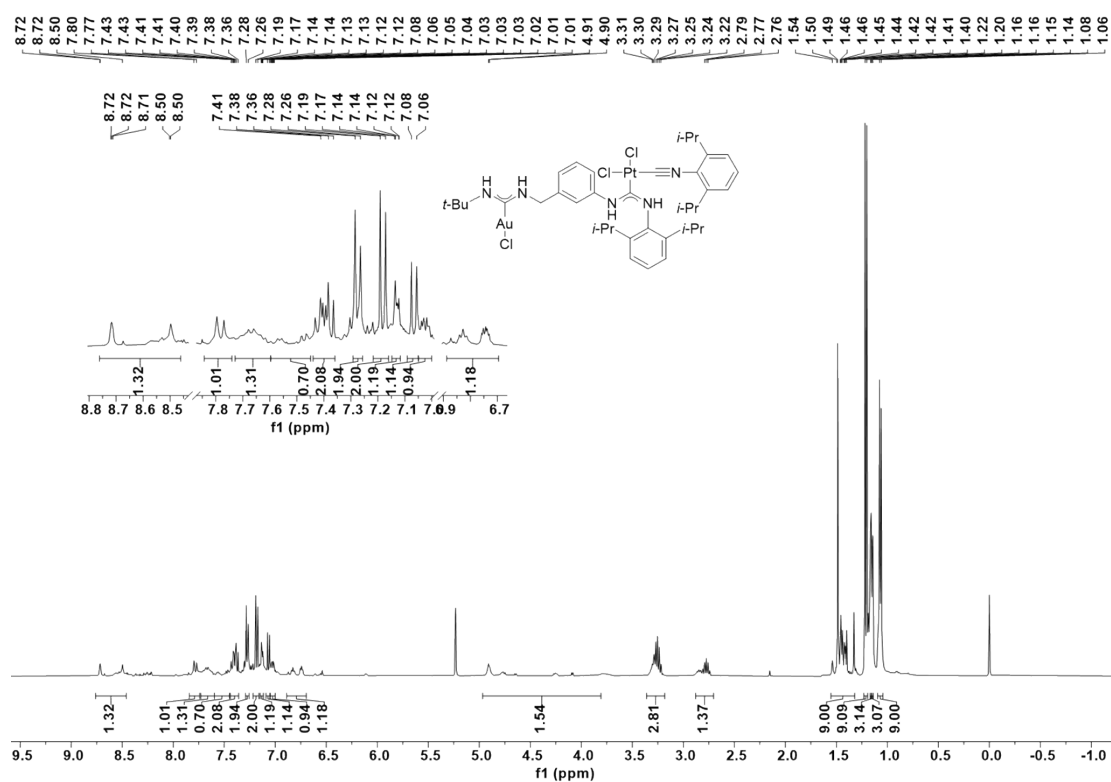

**Figure S13.**  $^1\text{H}$  NMR of **3a** in  $\text{CD}_2\text{Cl}_2$  (400 MHz, 295K).

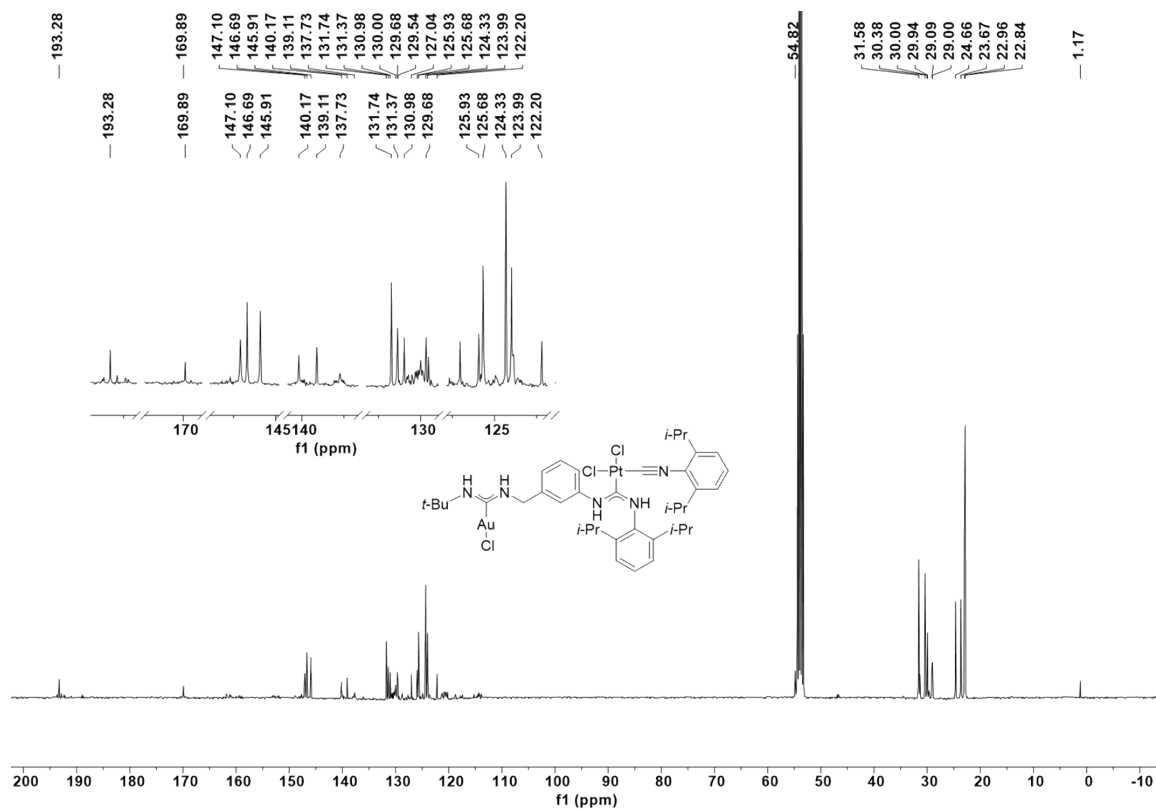

**Figure S14.**  $^{13}\text{C}$  NMR of **3a** in  $\text{CD}_2\text{Cl}_2$  (101 MHz, 295K).

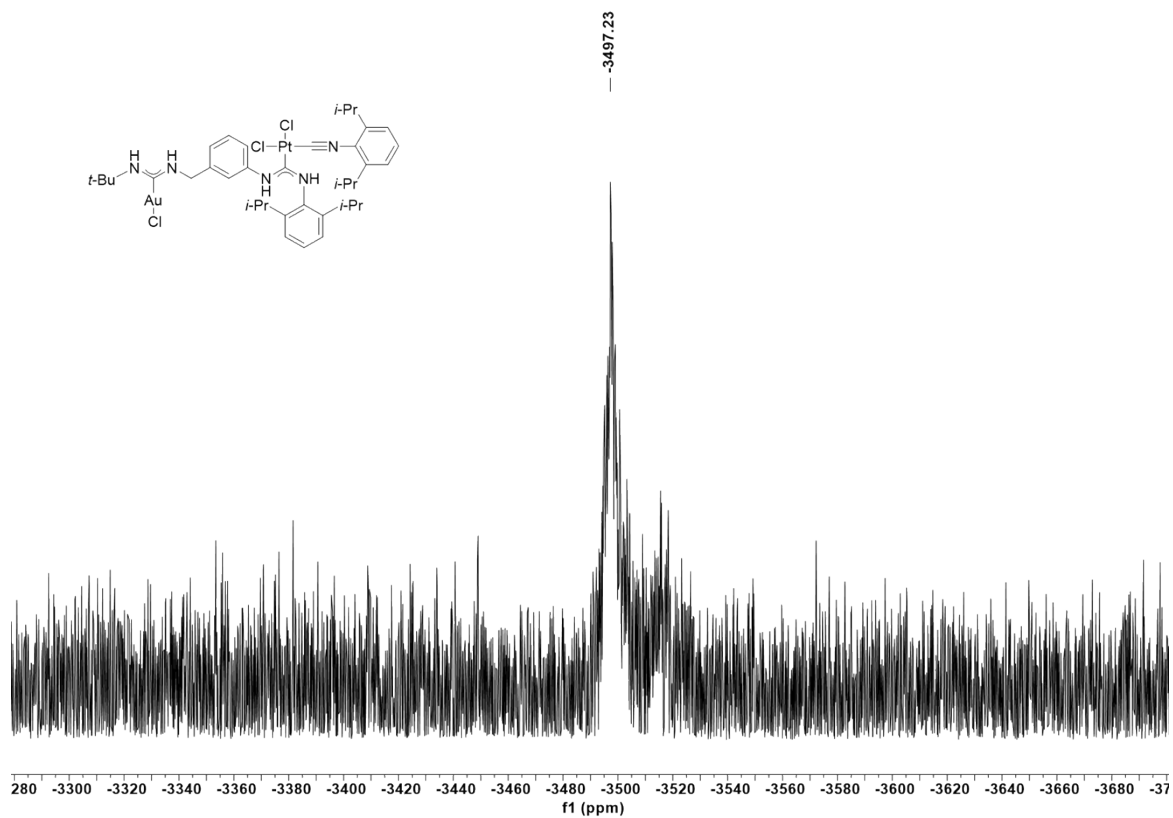

**Figure S15.**  $^{195}\text{Pt}$  NMR of **3a** in  $\text{CD}_2\text{Cl}_2$  (86 MHz, 295K).

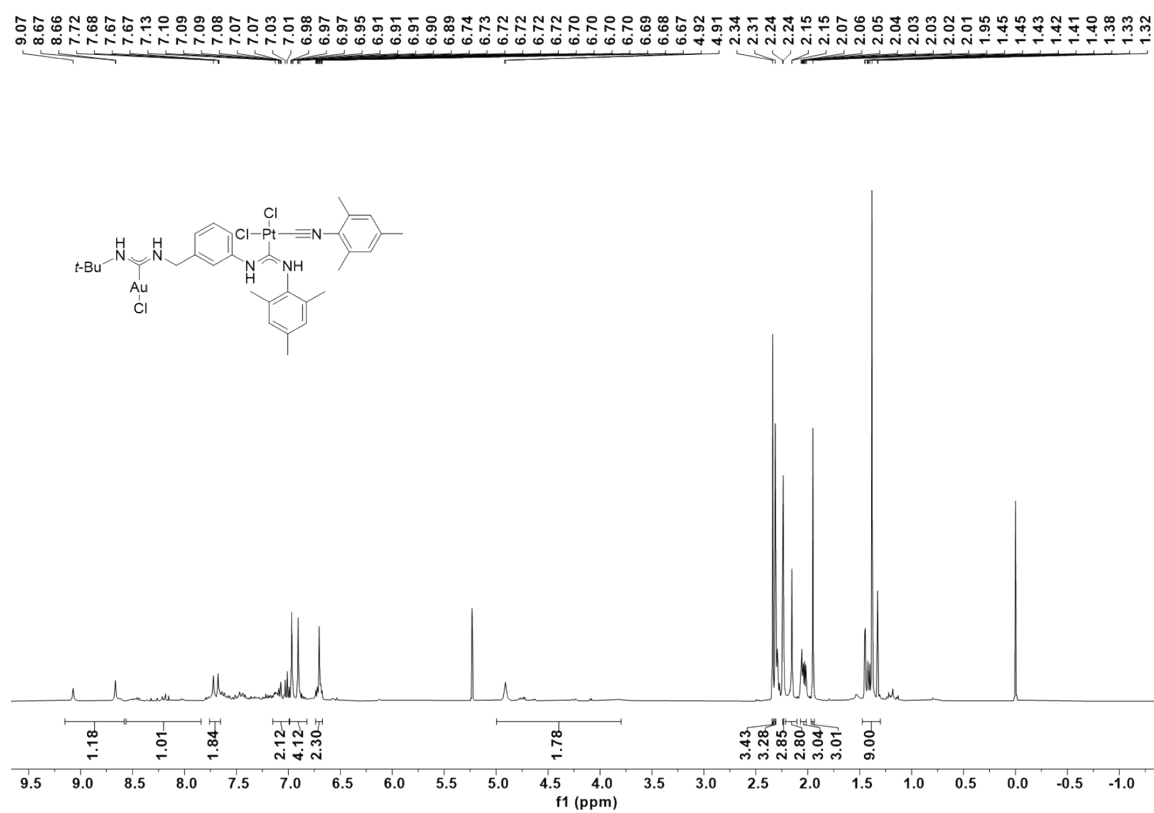

**Figure S16.**  $^1\text{H}$  NMR of **3b** in  $\text{CD}_2\text{Cl}_2$  (400 MHz, 295K).

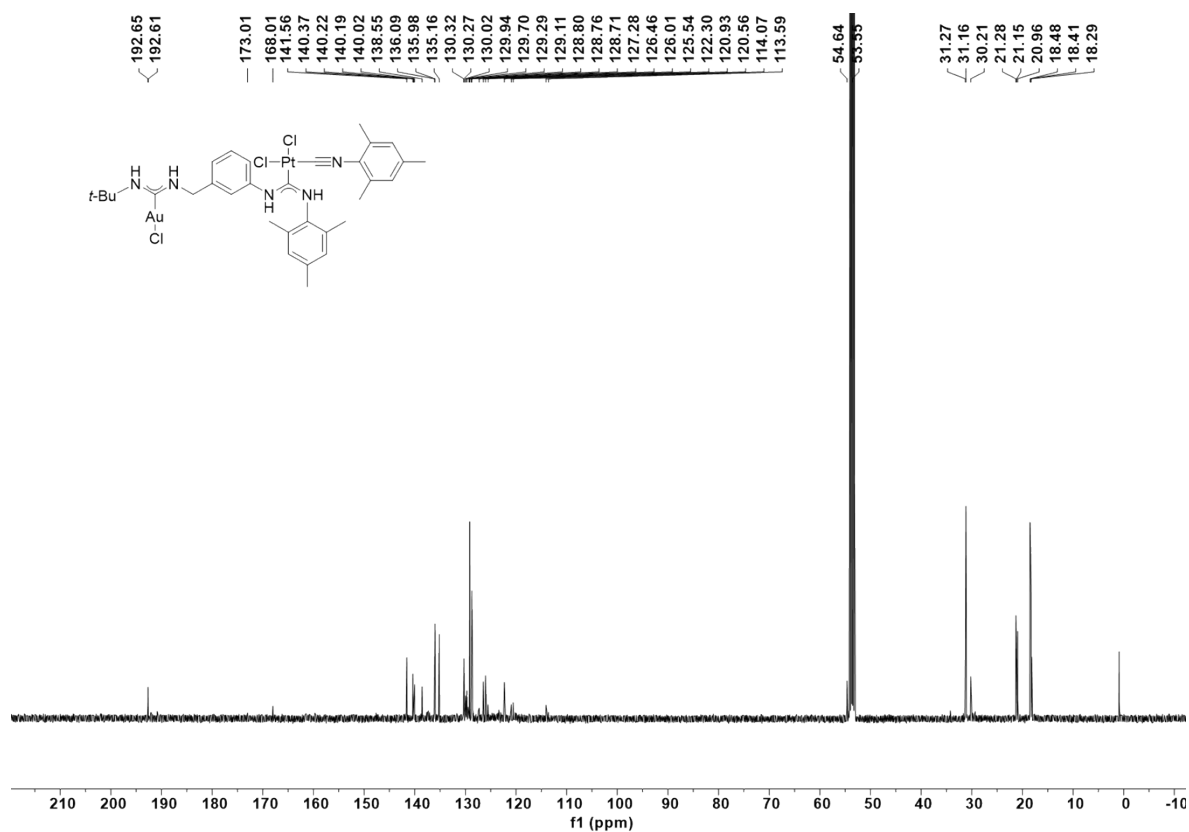

**Figure S17.**  $^{13}\text{C}$  NMR of **3b** in  $\text{CD}_2\text{Cl}_2$  (126 MHz, 295K).

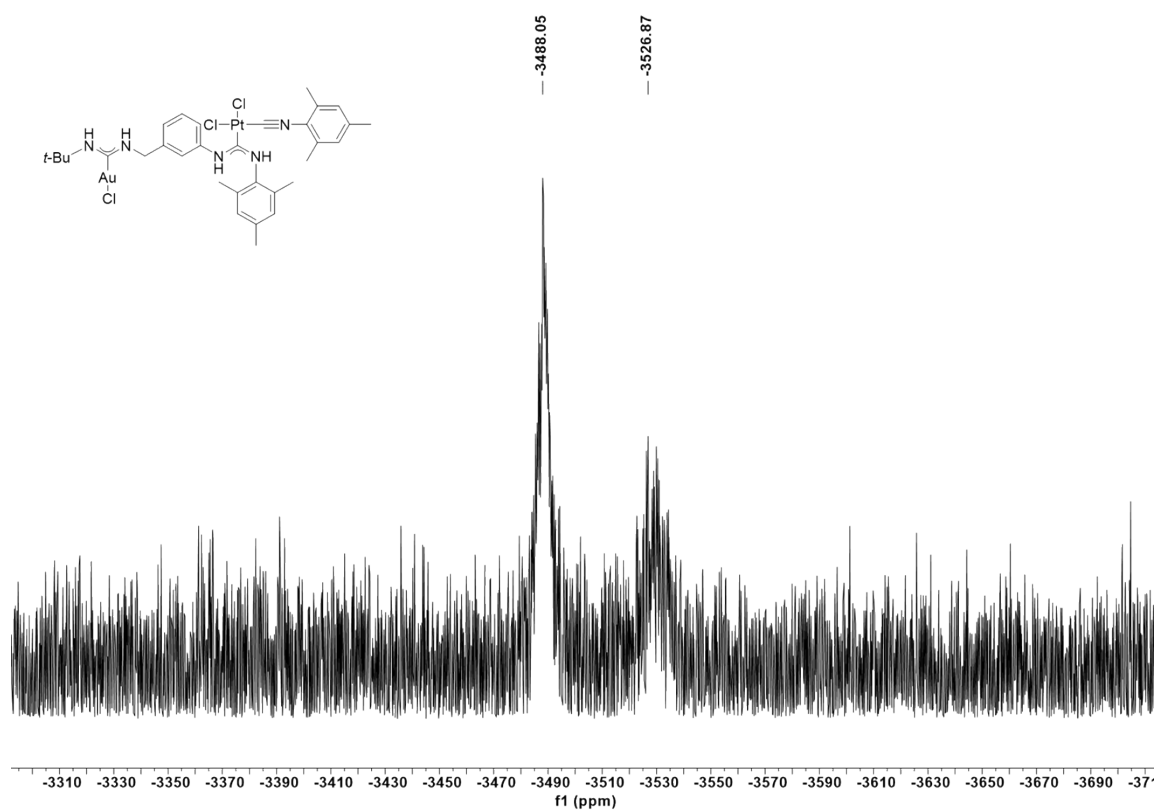

**Figure S18.**  $^{195}\text{Pt}$  NMR of **3b** in  $\text{CD}_2\text{Cl}_2$  (86 MHz, 295K).



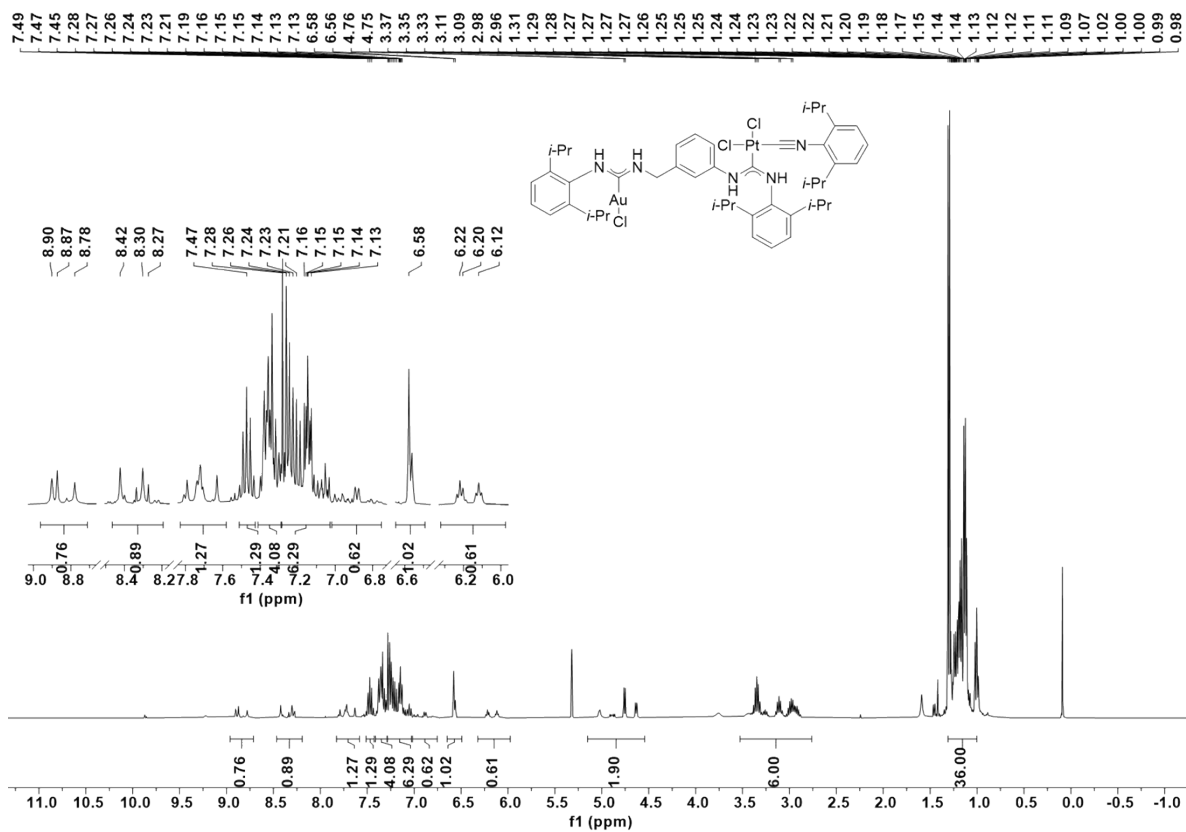

**Figure S19.**  $^1\text{H}$  NMR of **3c** in  $\text{CD}_2\text{Cl}_2$  (400 MHz, 295K).

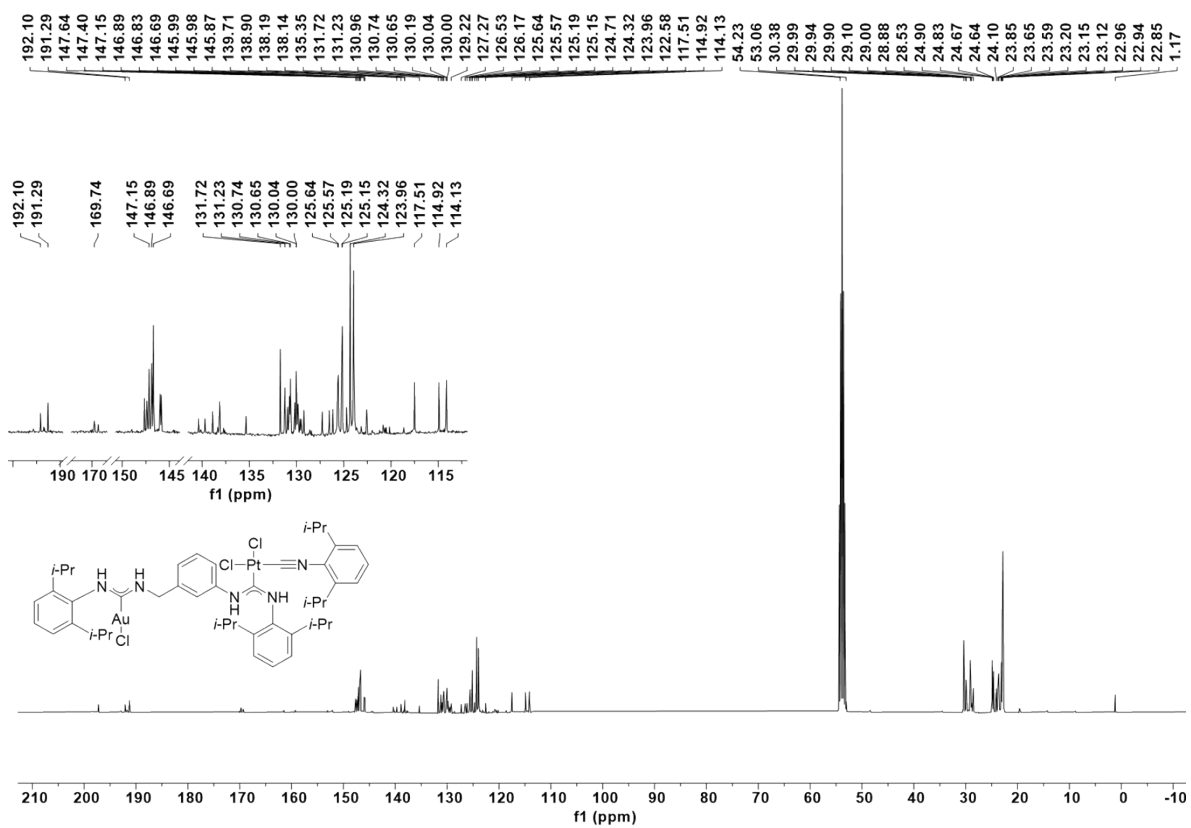

**Figure S20.**  $^{13}\text{C}$  NMR of **3c** in  $\text{CD}_2\text{Cl}_2$  (101 MHz, 295K).

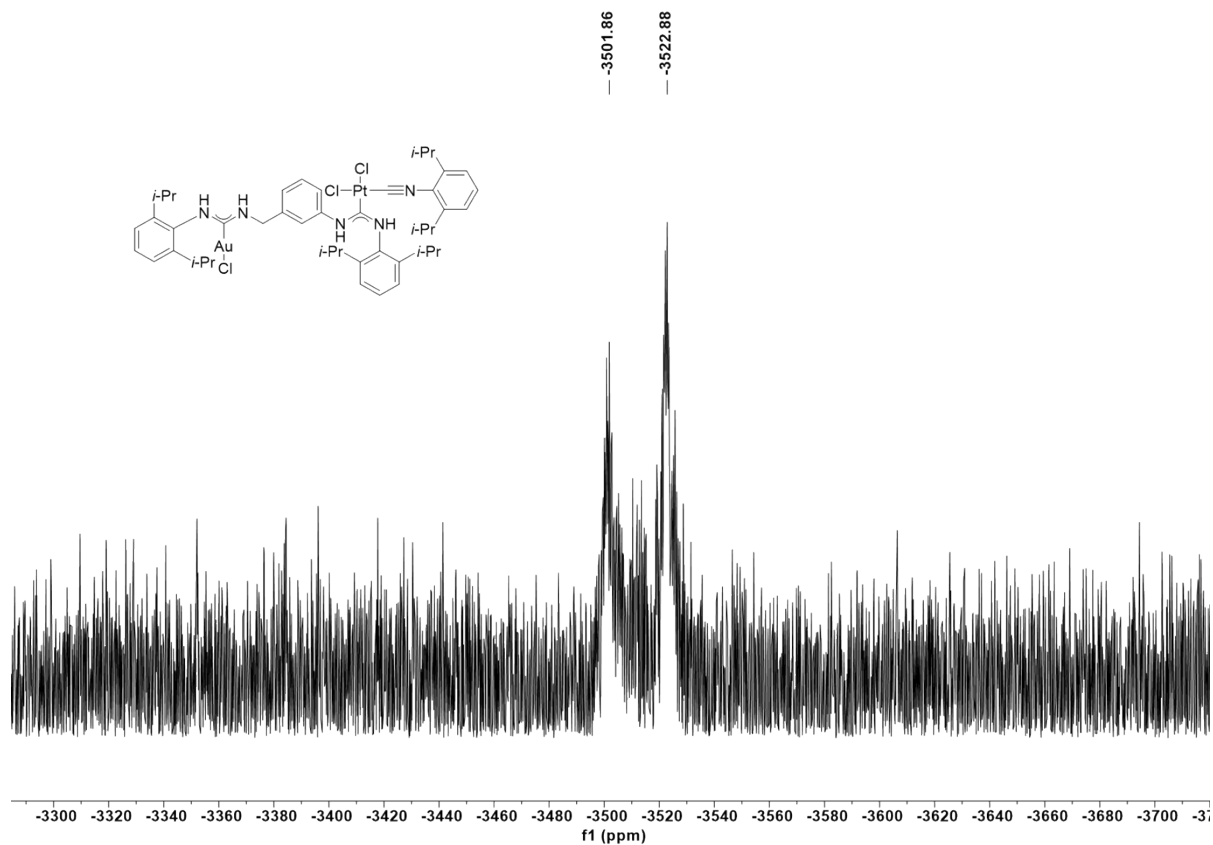

**Figure S21.**  $^{195}\text{Pt}$  NMR of **3c** in  $\text{CD}_2\text{Cl}_2$  (86 MHz, 295K).

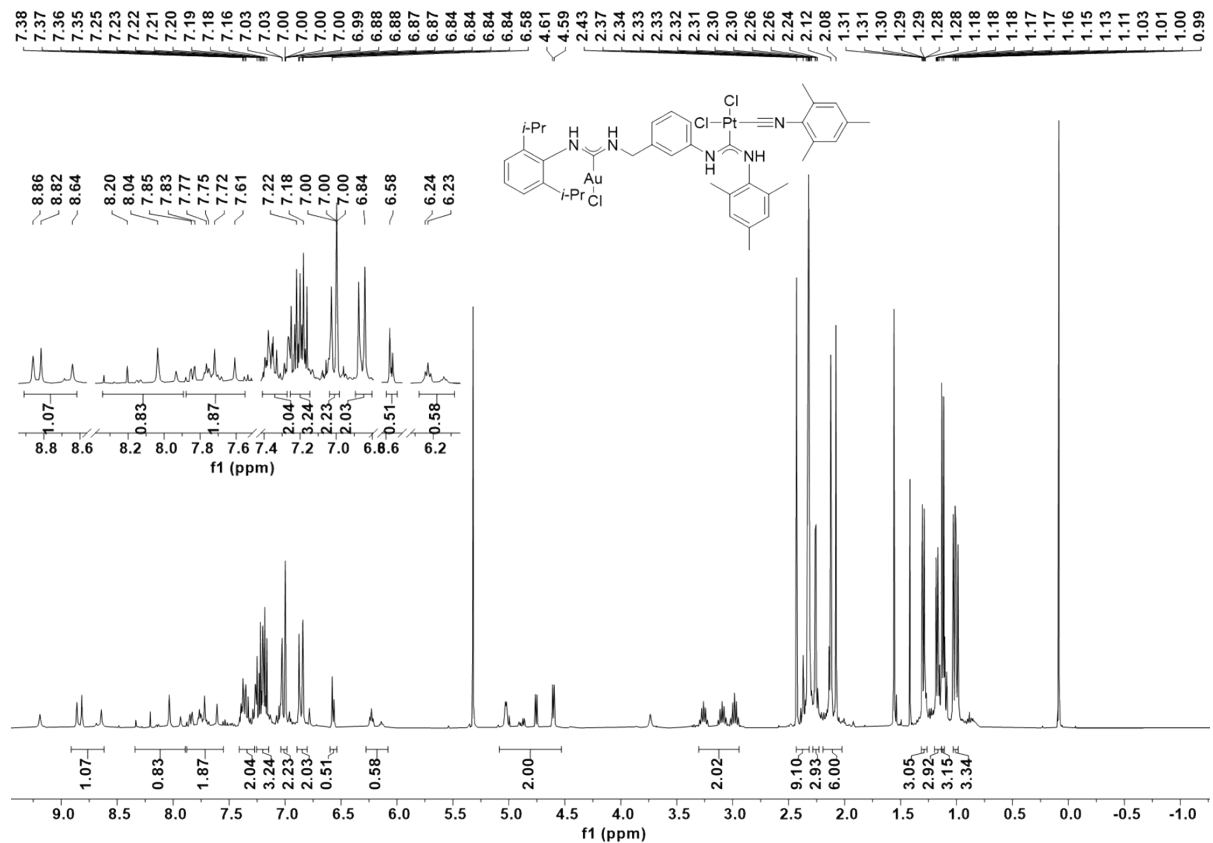

**Figure S22.**  $^1\text{H}$  NMR of **3d** in  $\text{CD}_2\text{Cl}_2$  (400 MHz, 295K).

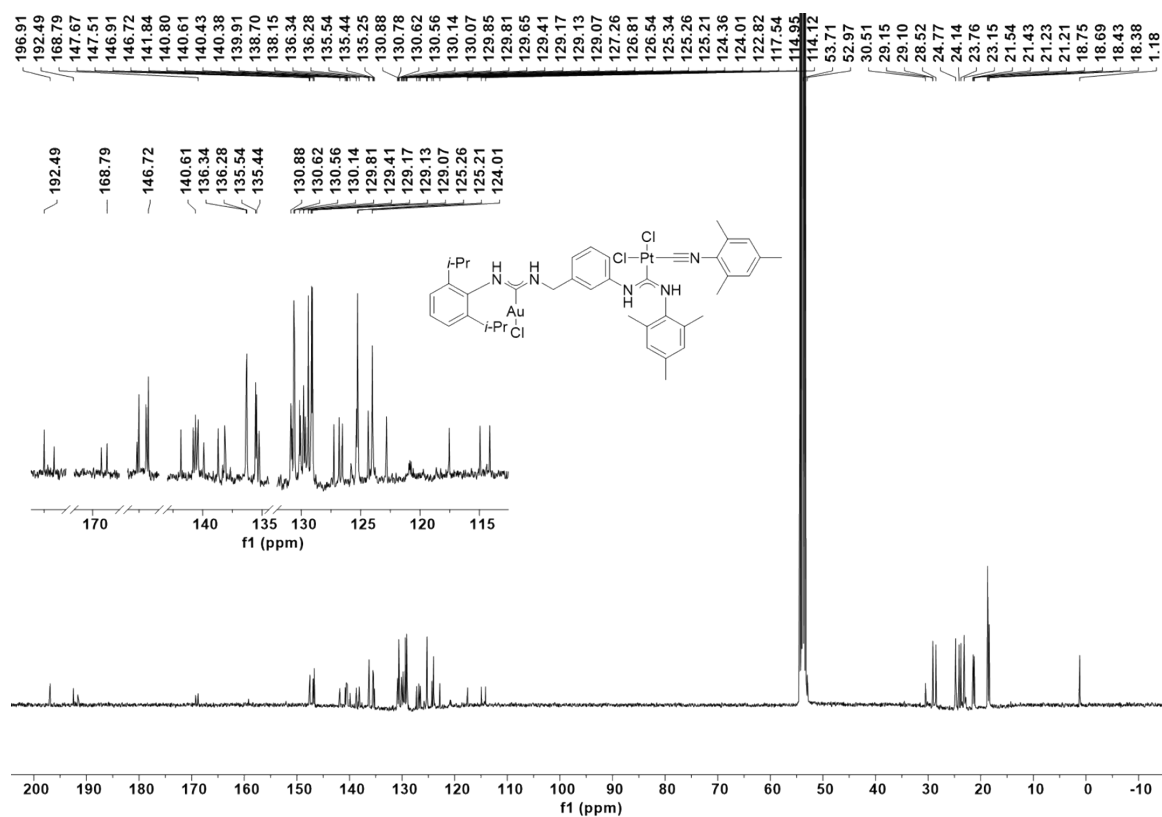

**Figure S23.**  $^{13}\text{C}$  NMR of **3d** in  $\text{CD}_2\text{Cl}_2$  (101 MHz, 295K).

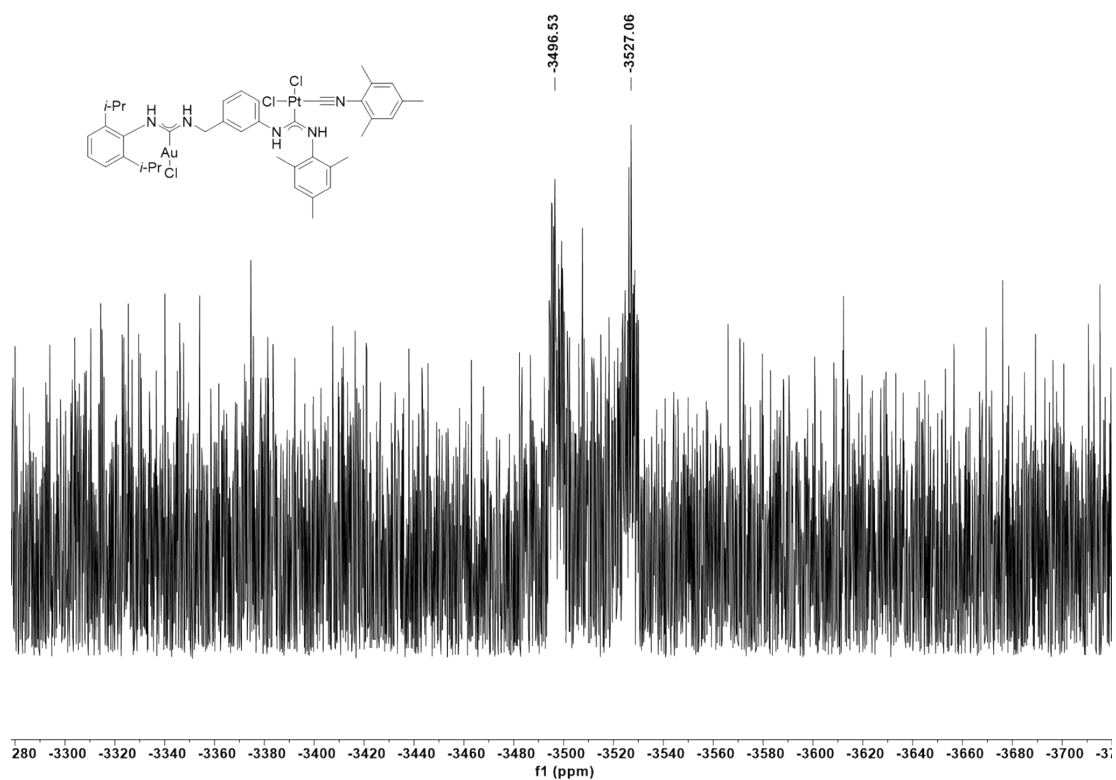

**Figure S24.**  $^{195}\text{Pt}$  NMR of **3d** in  $\text{CD}_2\text{Cl}_2$  (86 MHz, 295K).

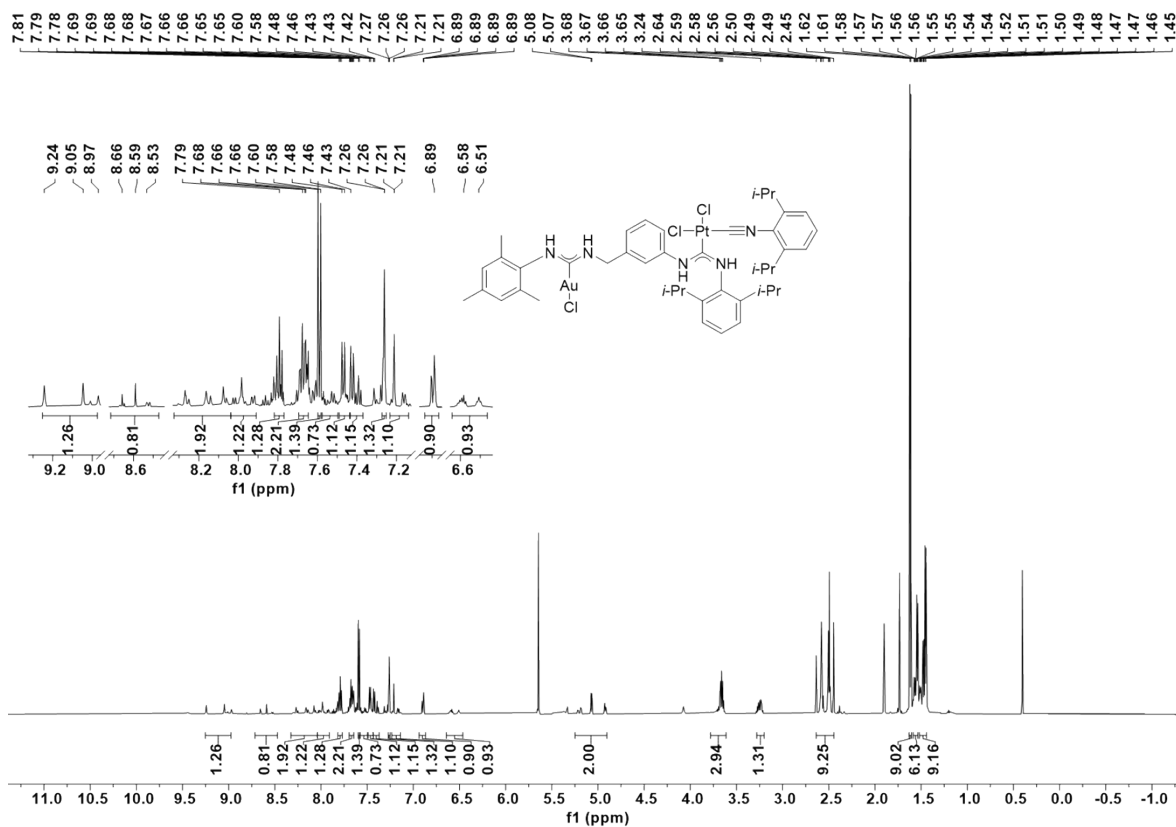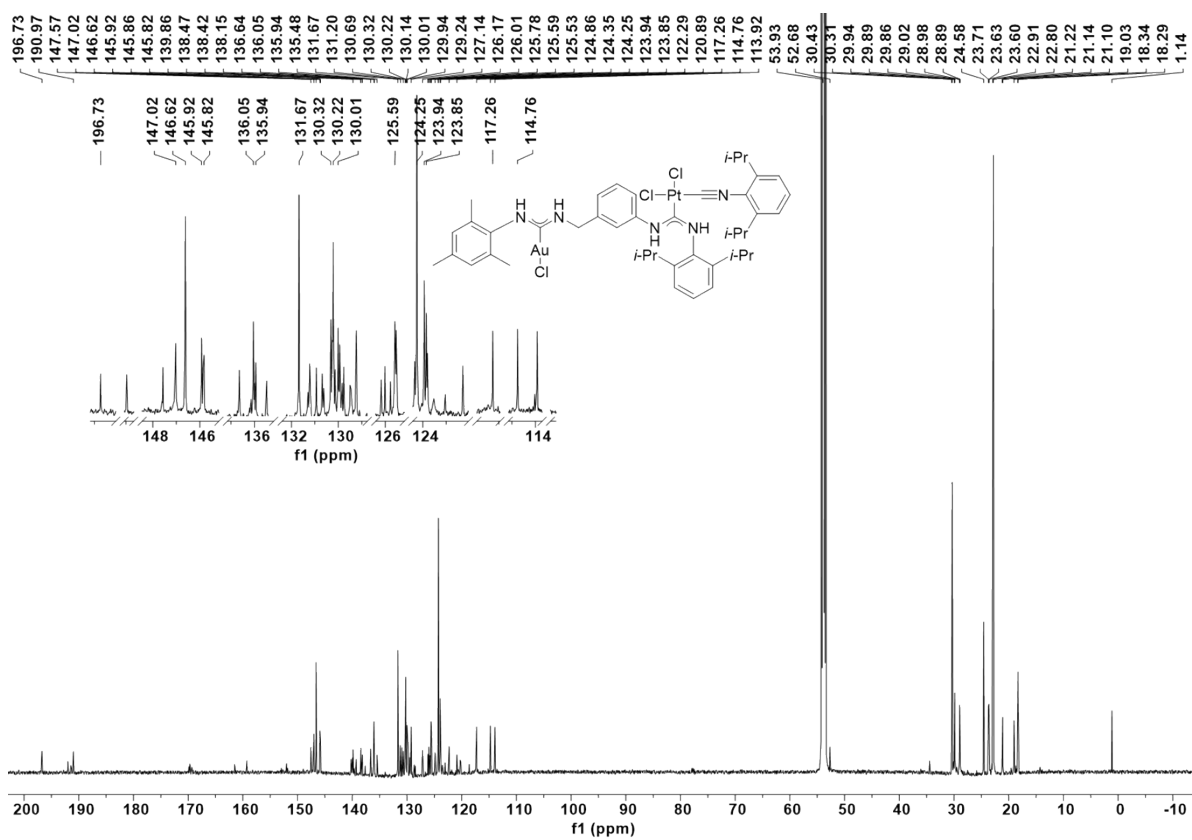

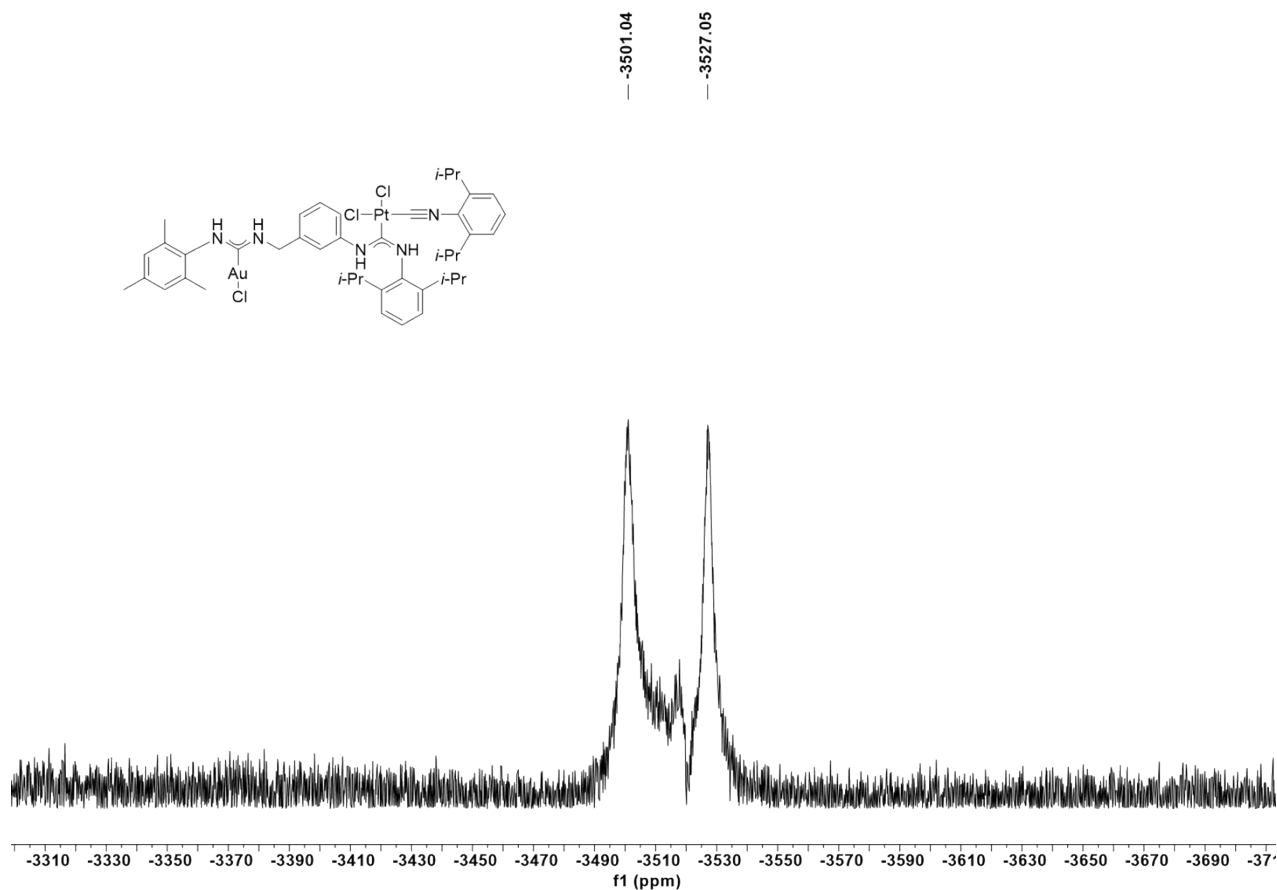

**Figure S27.**  $^{195}\text{Pt}$  NMR of **3e** in  $\text{CD}_2\text{Cl}_2$  (86 MHz, 295K).

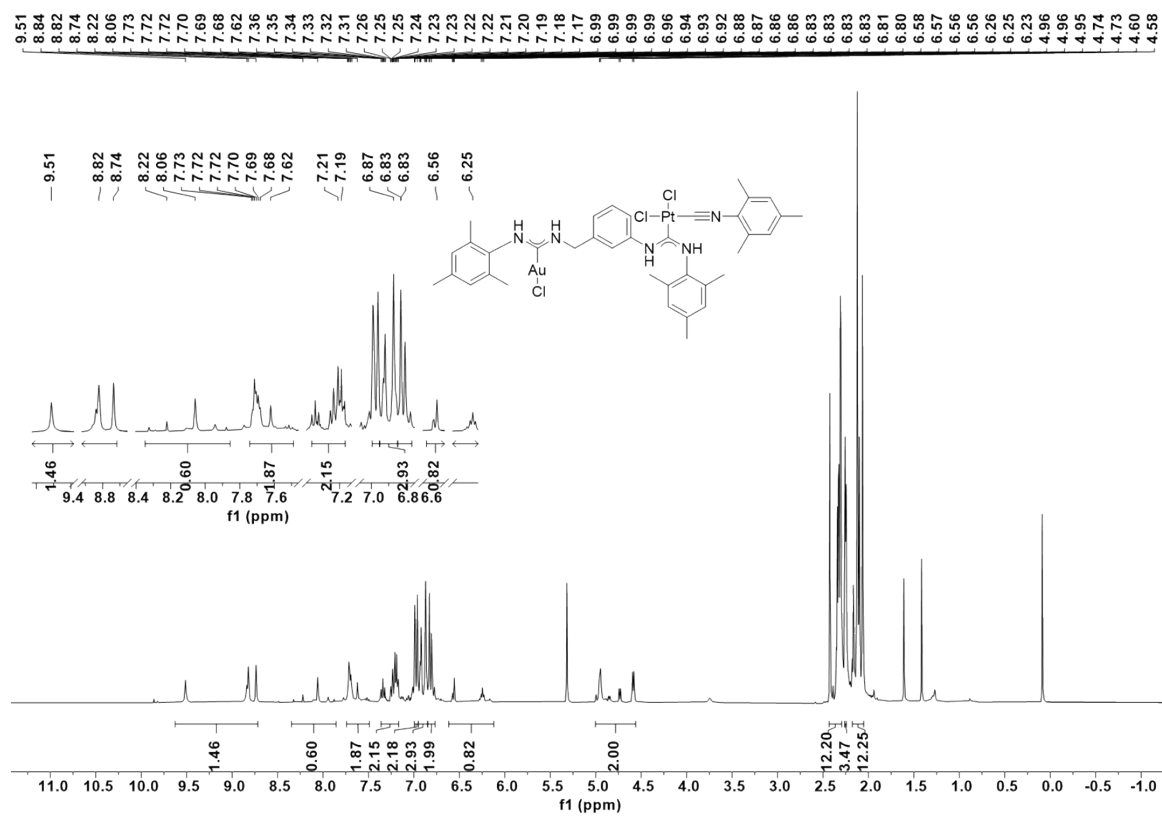

**Figure S28.**  $^1\text{H}$  NMR of **3f** in  $\text{CD}_2\text{Cl}_2$  (400 MHz, 295K).

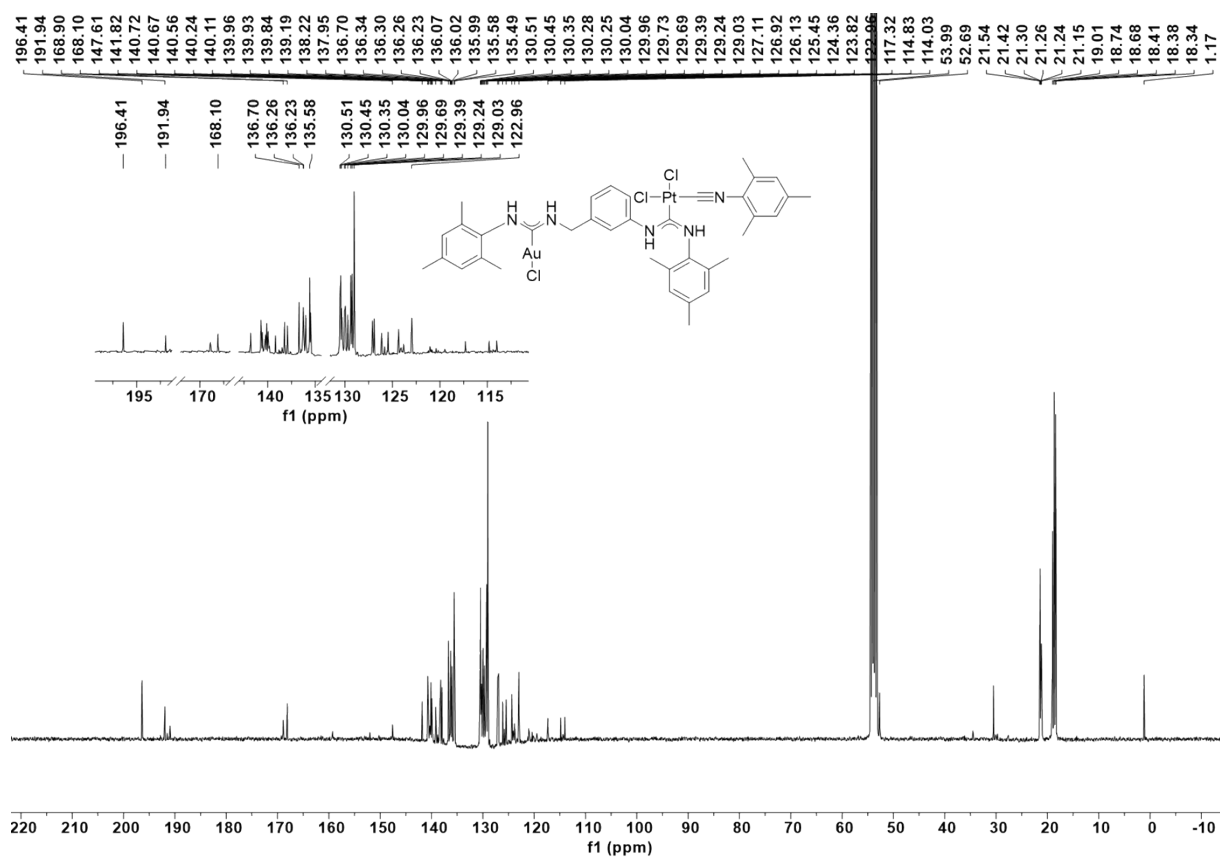

**Figure S29.** <sup>13</sup>C NMR of **3f** in CD<sub>2</sub>Cl<sub>2</sub> (101 MHz, 295K).

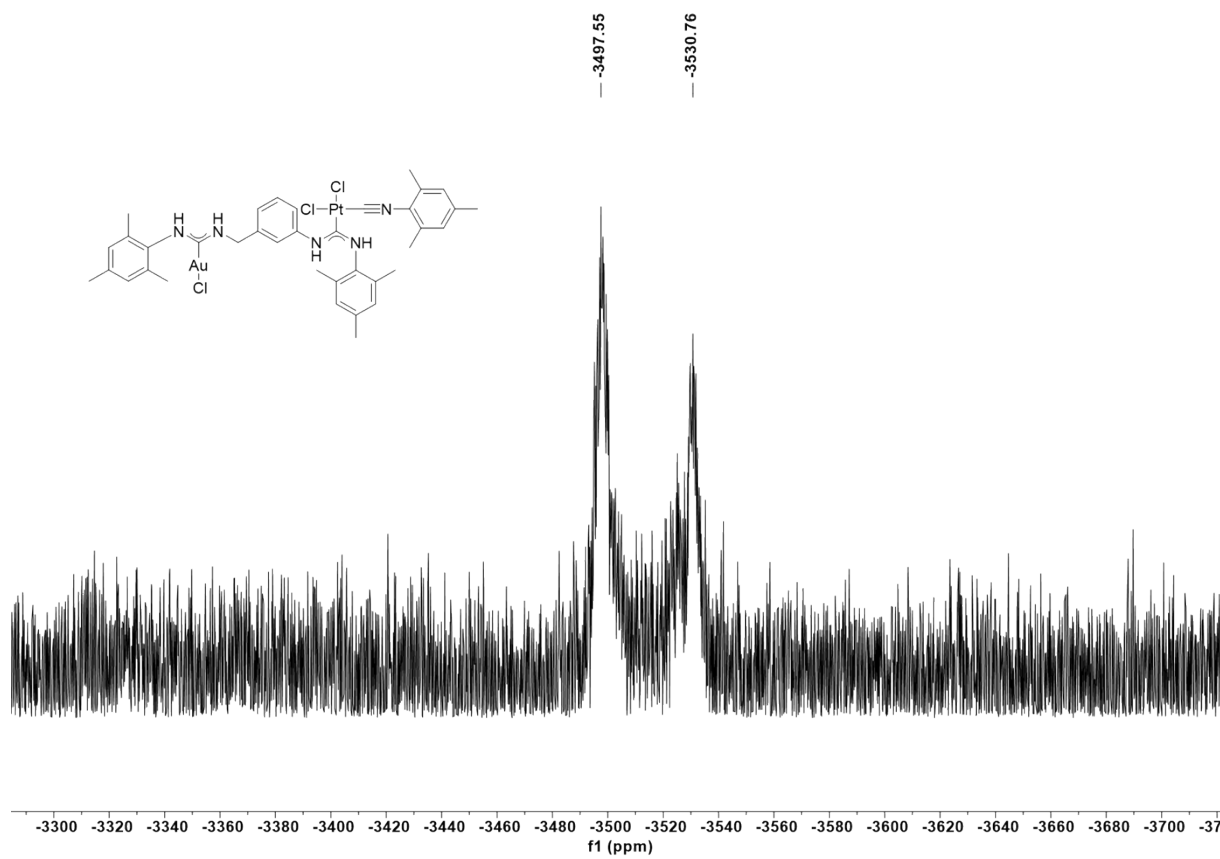

**Figure S30.** <sup>195</sup>Pt NMR of **3f** in CD<sub>2</sub>Cl<sub>2</sub> (86 MHz, 295K).

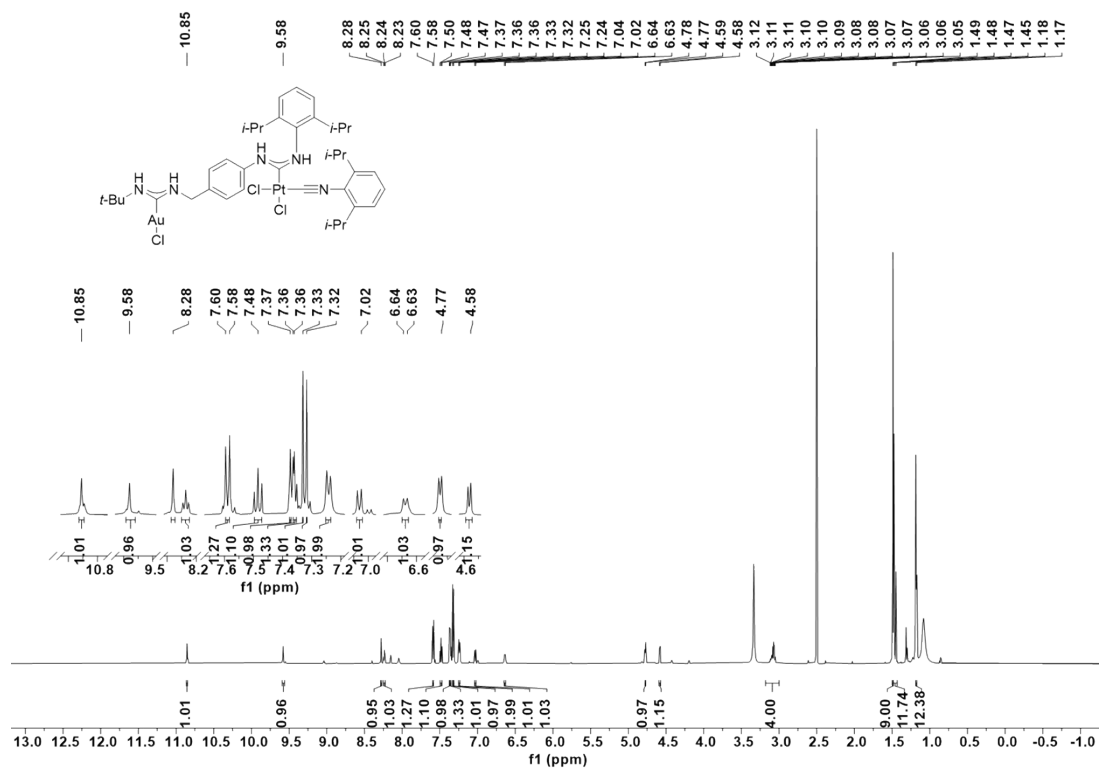

Figure S31. <sup>1</sup>H NMR of **3g** in DMSO-d<sub>6</sub> (600 MHz, 295K).

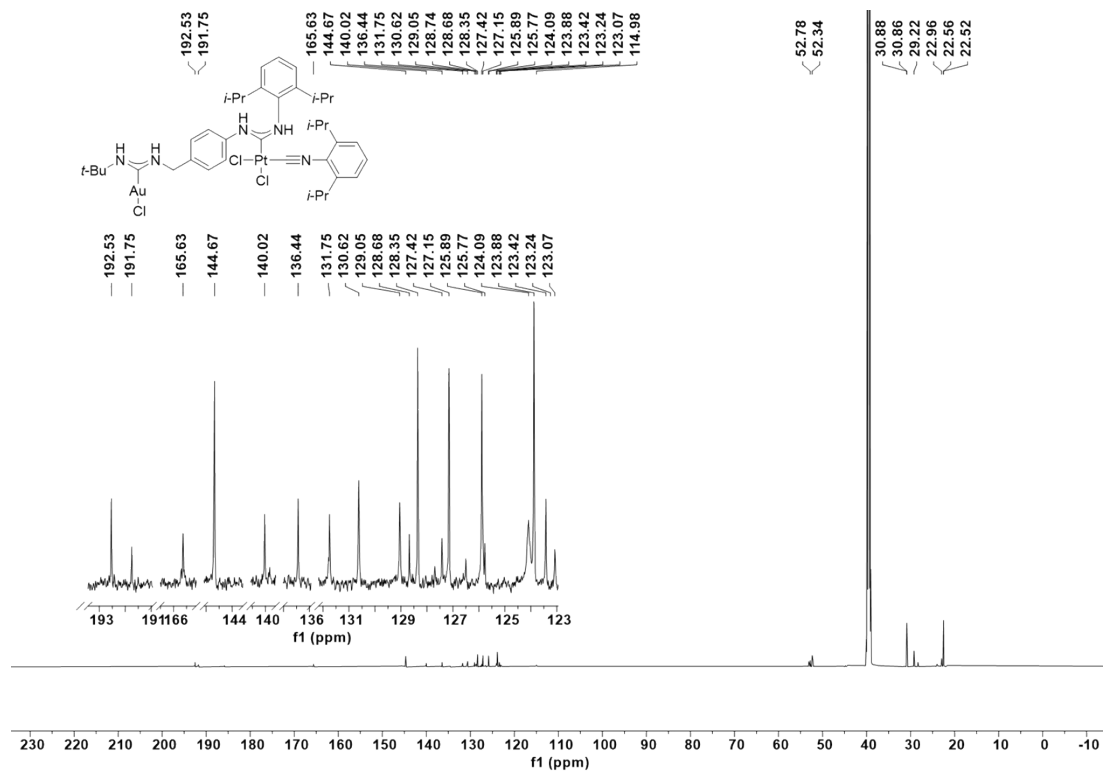

Figure S32. <sup>13</sup>C NMR of **3g** in DMSO-d<sub>6</sub> (151 MHz, 295K).

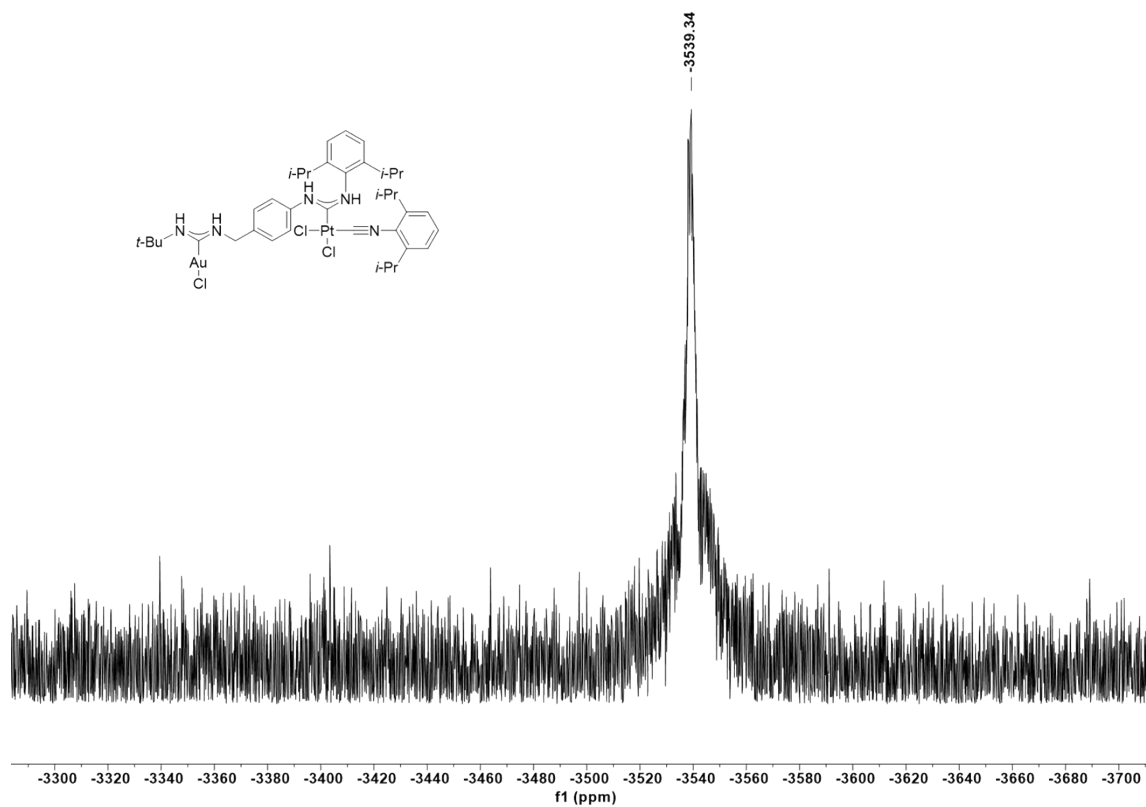

**Figure S33.**  $^{195}\text{Pt}$  NMR of **3g** in  $\text{DMSO-d}_6$  (86 MHz, 295K).

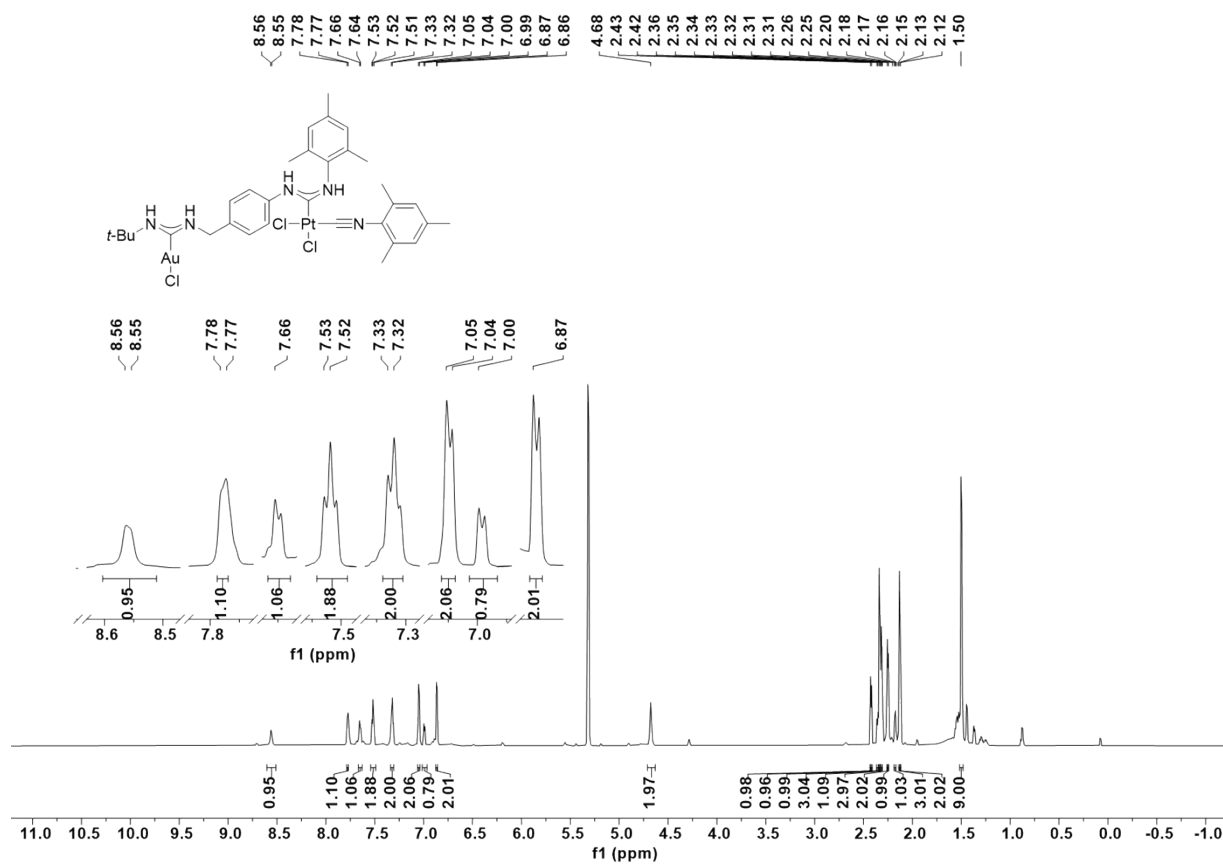

**Figure S34.**  $^1\text{H}$  NMR of **3h** in  $\text{CD}_2\text{Cl}_2$  (700 MHz, 295K).



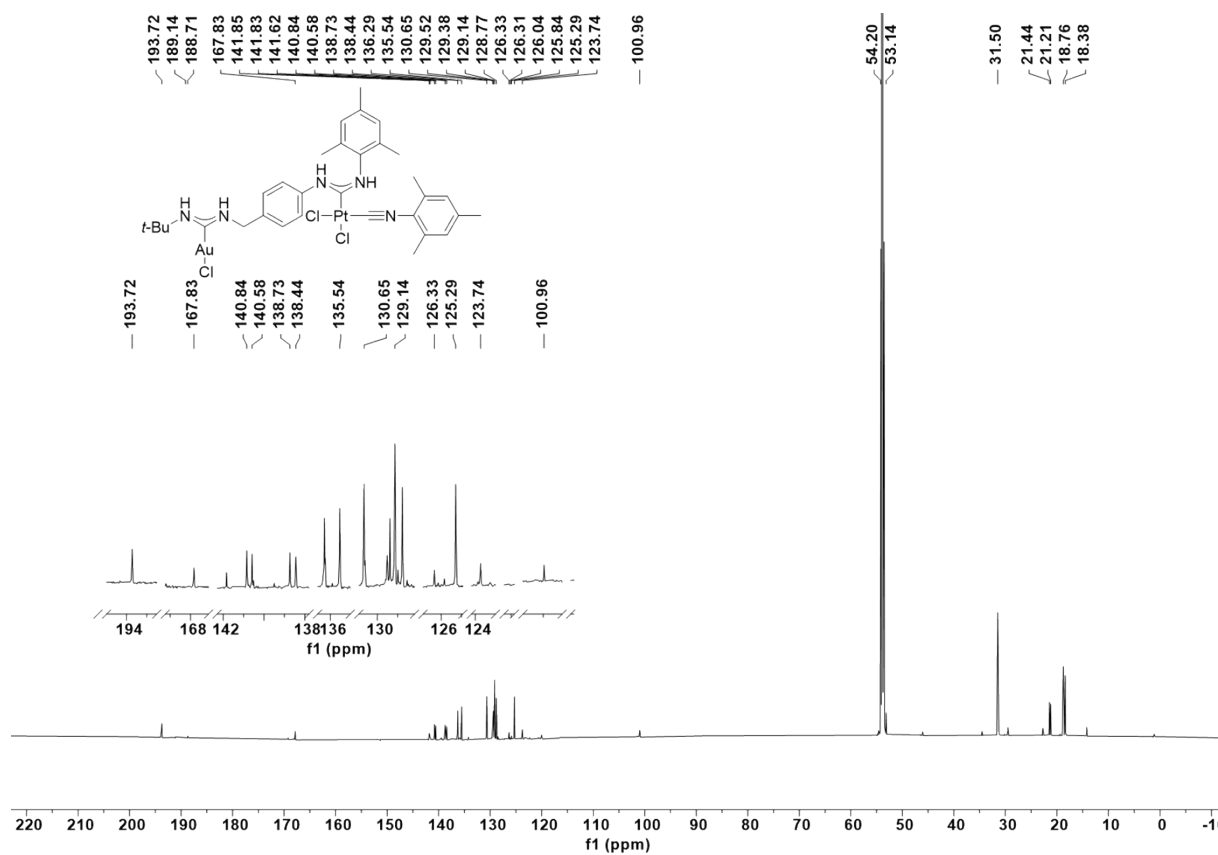

**Figure S35.**  $^{13}\text{C}$  NMR of **3h** in  $\text{CD}_2\text{Cl}_2$  (176 MHz, 295K).

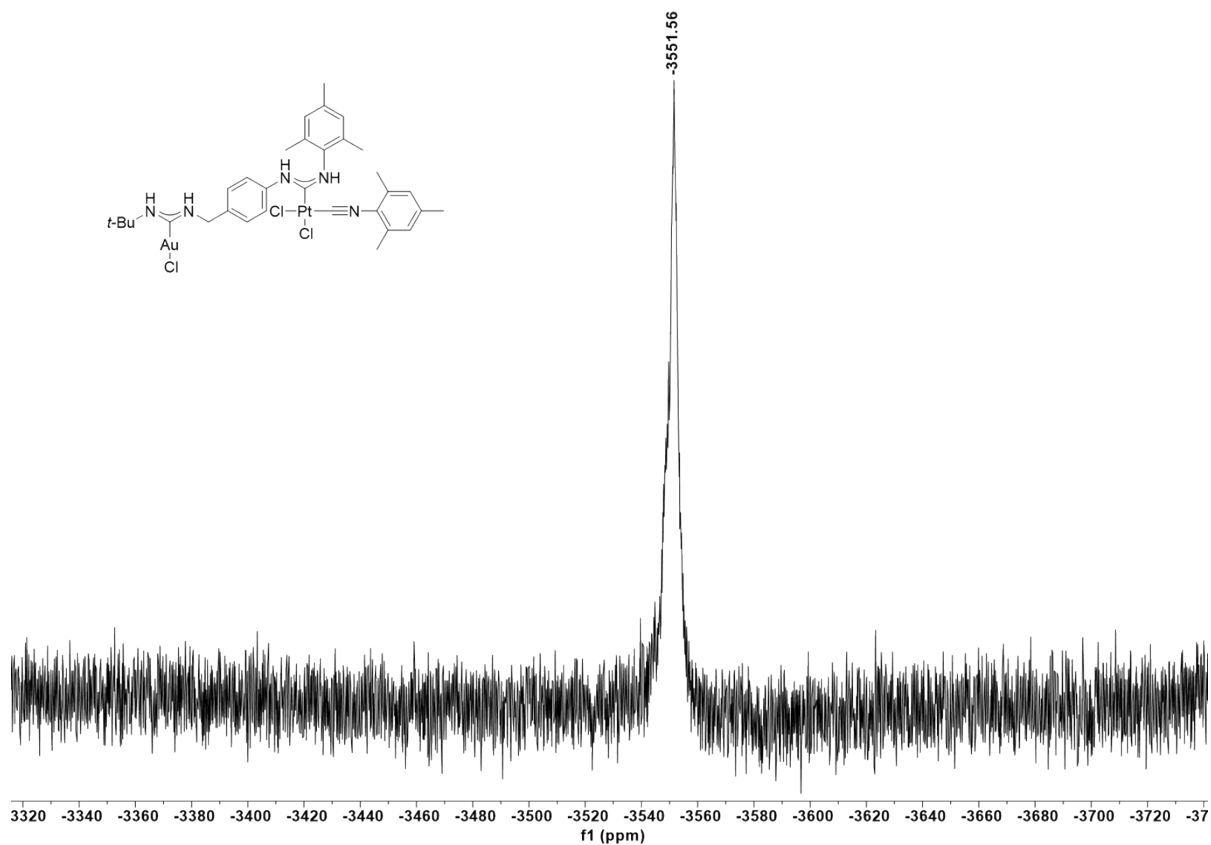

**Figure S36.**  $^{195}\text{Pt}$  NMR of **3h** in  $\text{CD}_2\text{Cl}_2$  (86 MHz, 295K).

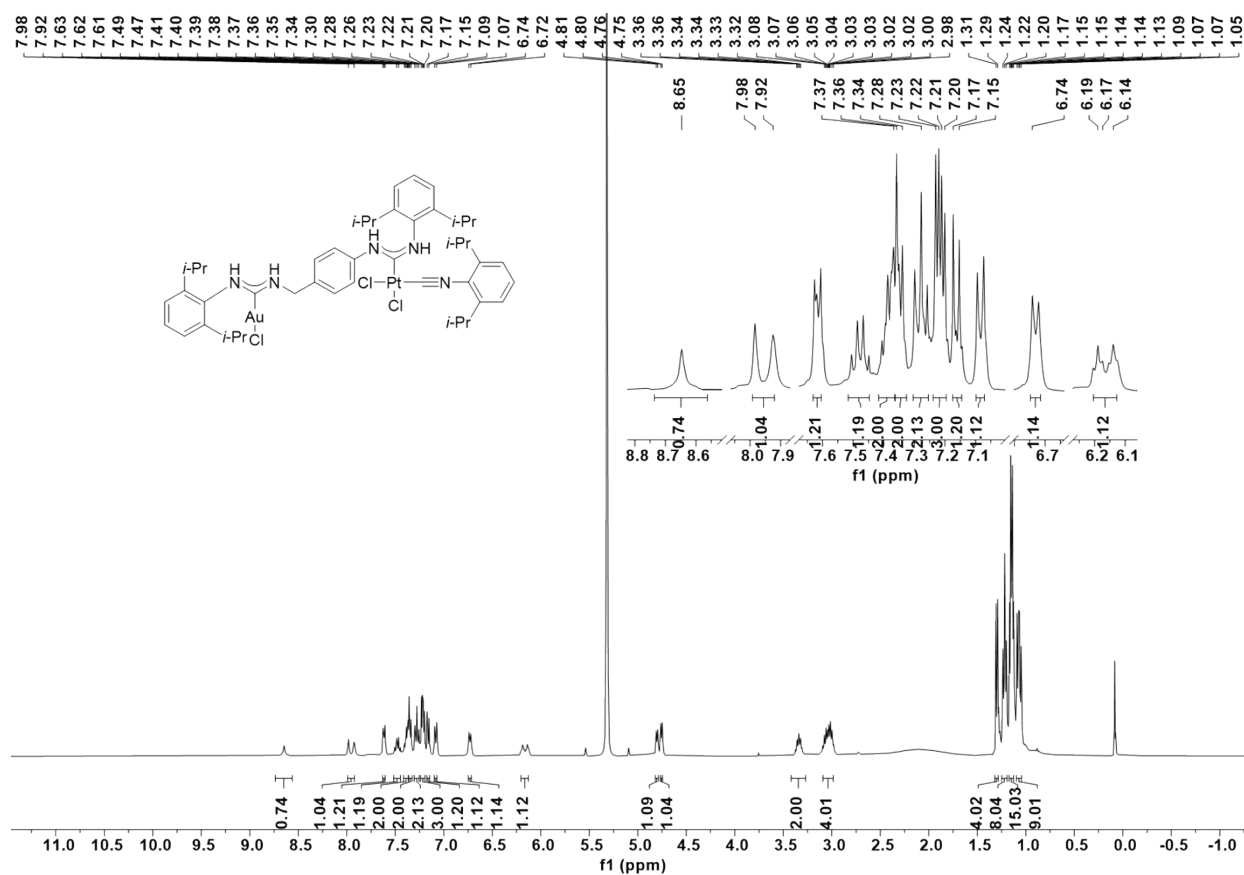

**Figure S37.**  $^1\text{H}$  NMR of **3i** in  $\text{CD}_2\text{Cl}_2$  (400 MHz, 295K).

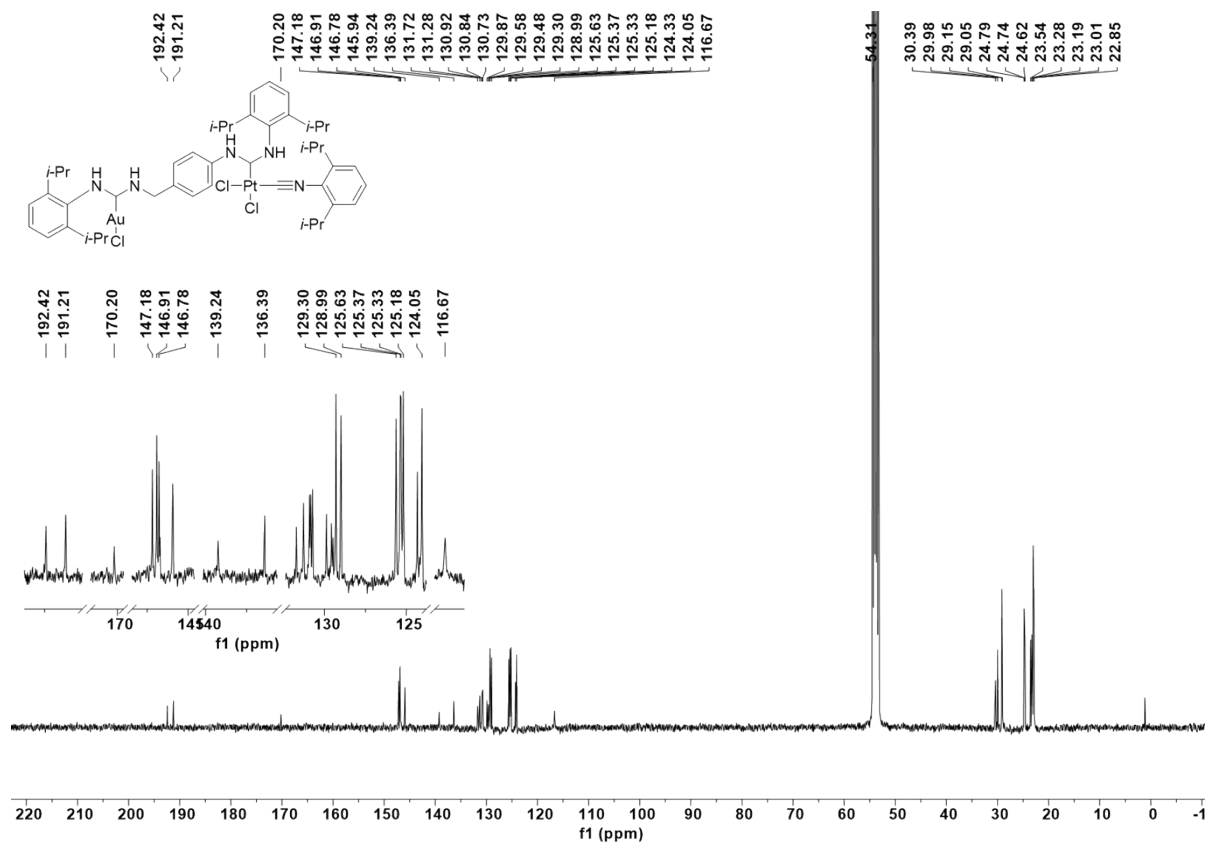

**Figure S38.**  $^{13}\text{C}$  NMR of **3i** in  $\text{CD}_2\text{Cl}_2$  (100 MHz, 295K).

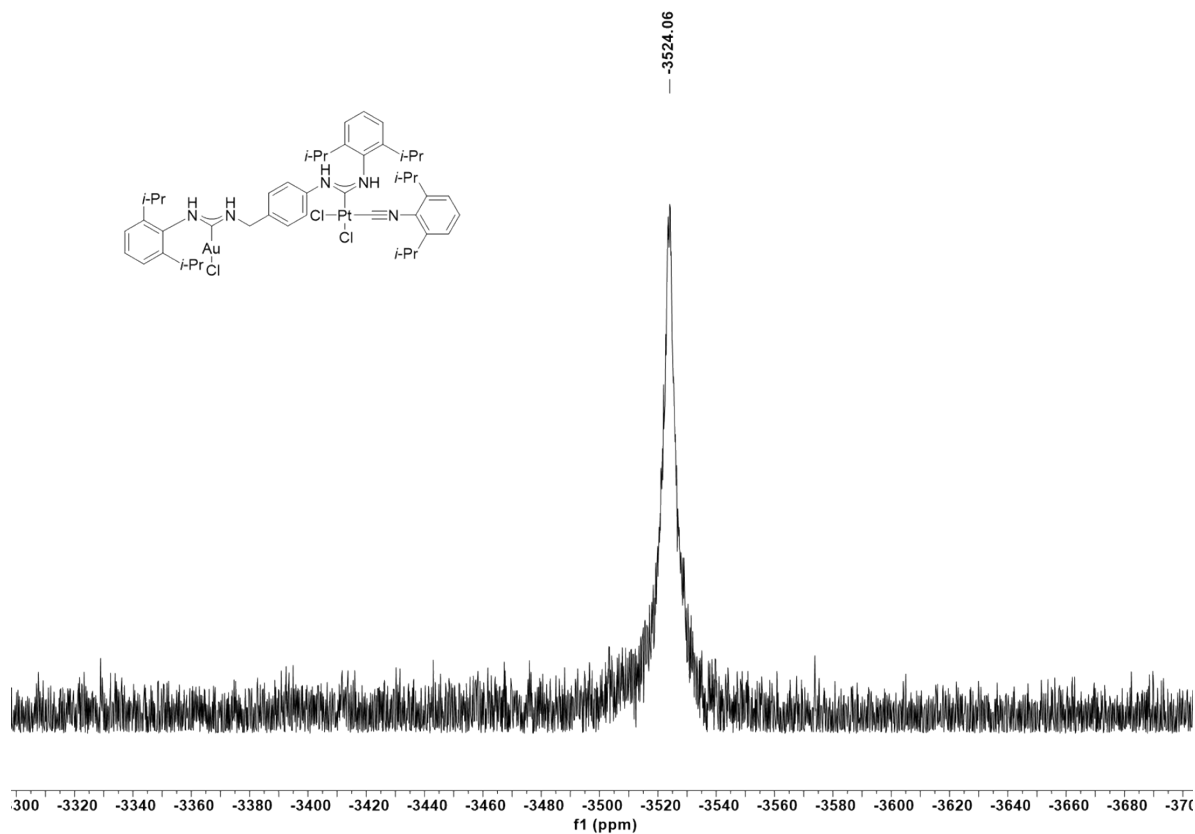

**Figure S39.**  $^{195}\text{Pt}$  NMR of **3i** in  $\text{CD}_2\text{Cl}_2$  (86 MHz, 295K).

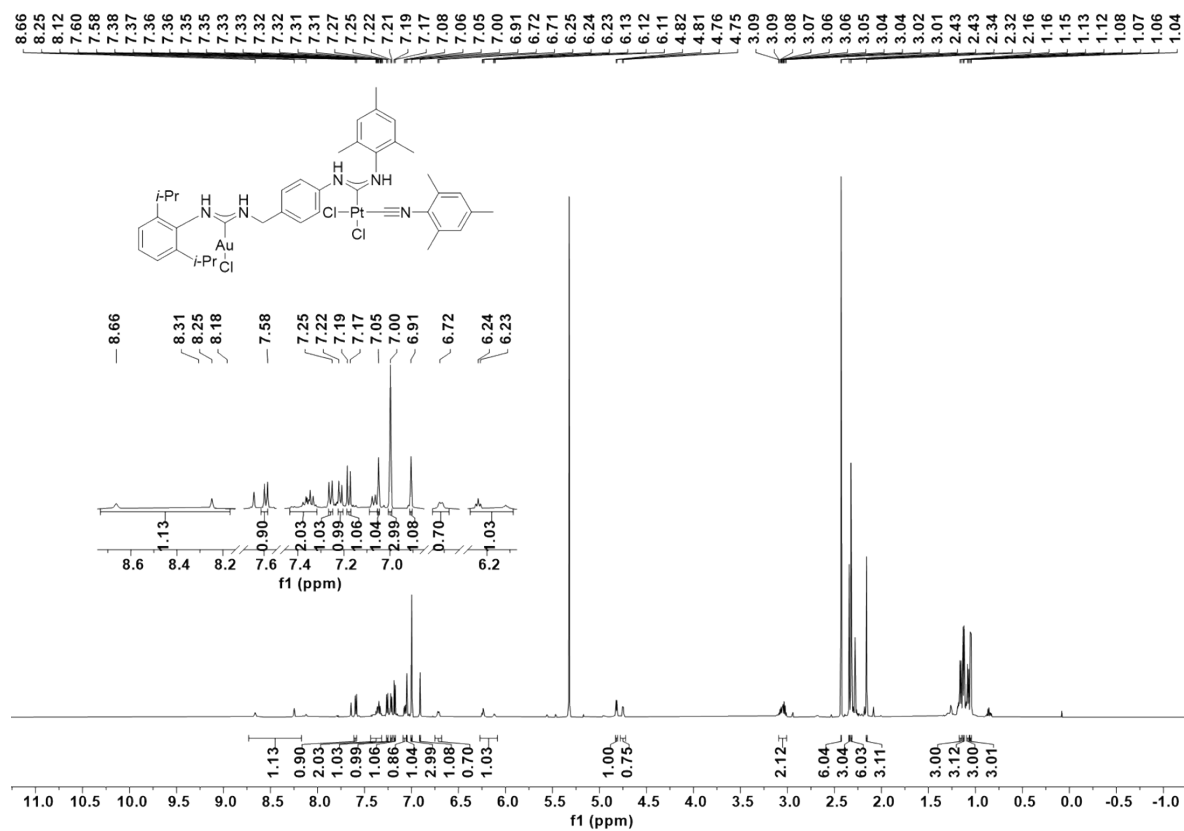

**Figure S40.**  $^1\text{H}$  NMR of **3j** in  $\text{CD}_2\text{Cl}_2$  (600 MHz, 295K).

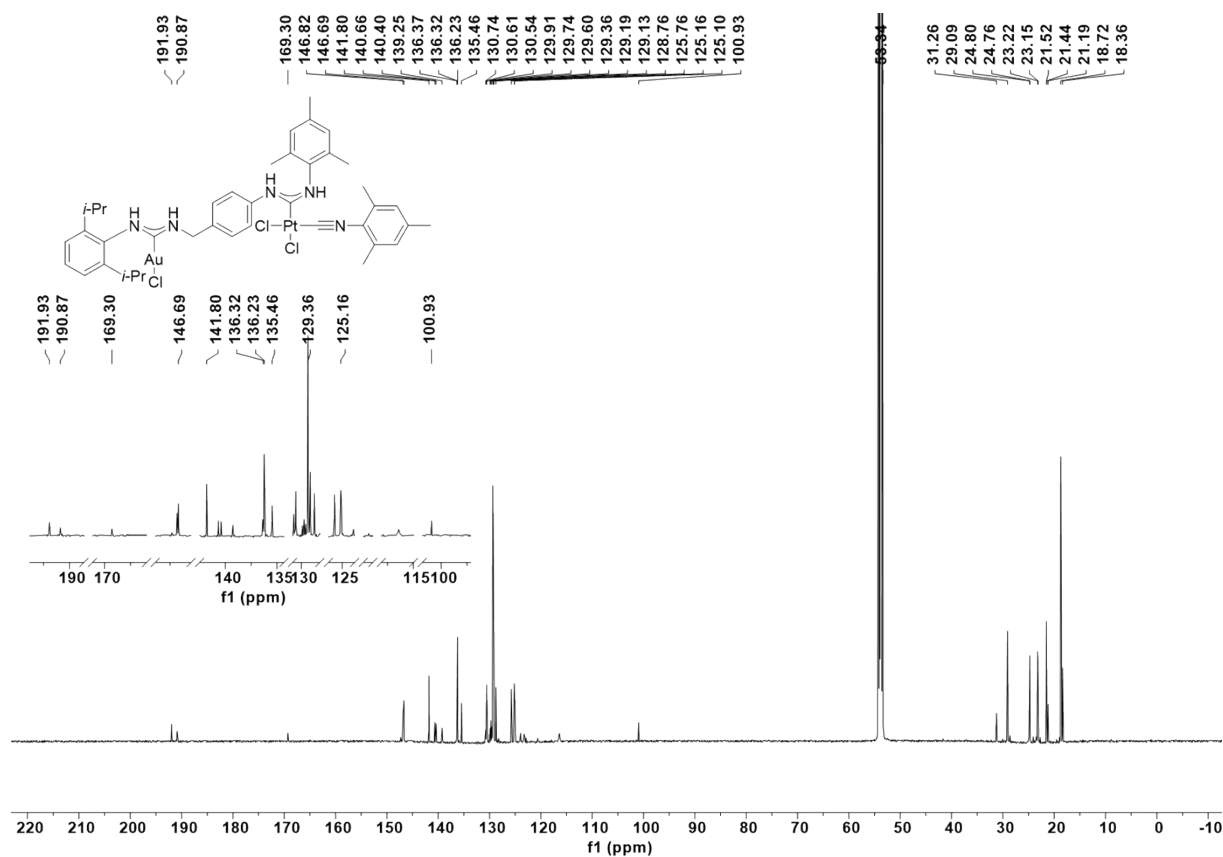

**Figure S41.** <sup>13</sup>C NMR of **3j** in CD<sub>2</sub>Cl<sub>2</sub> (100 MHz, 295K).

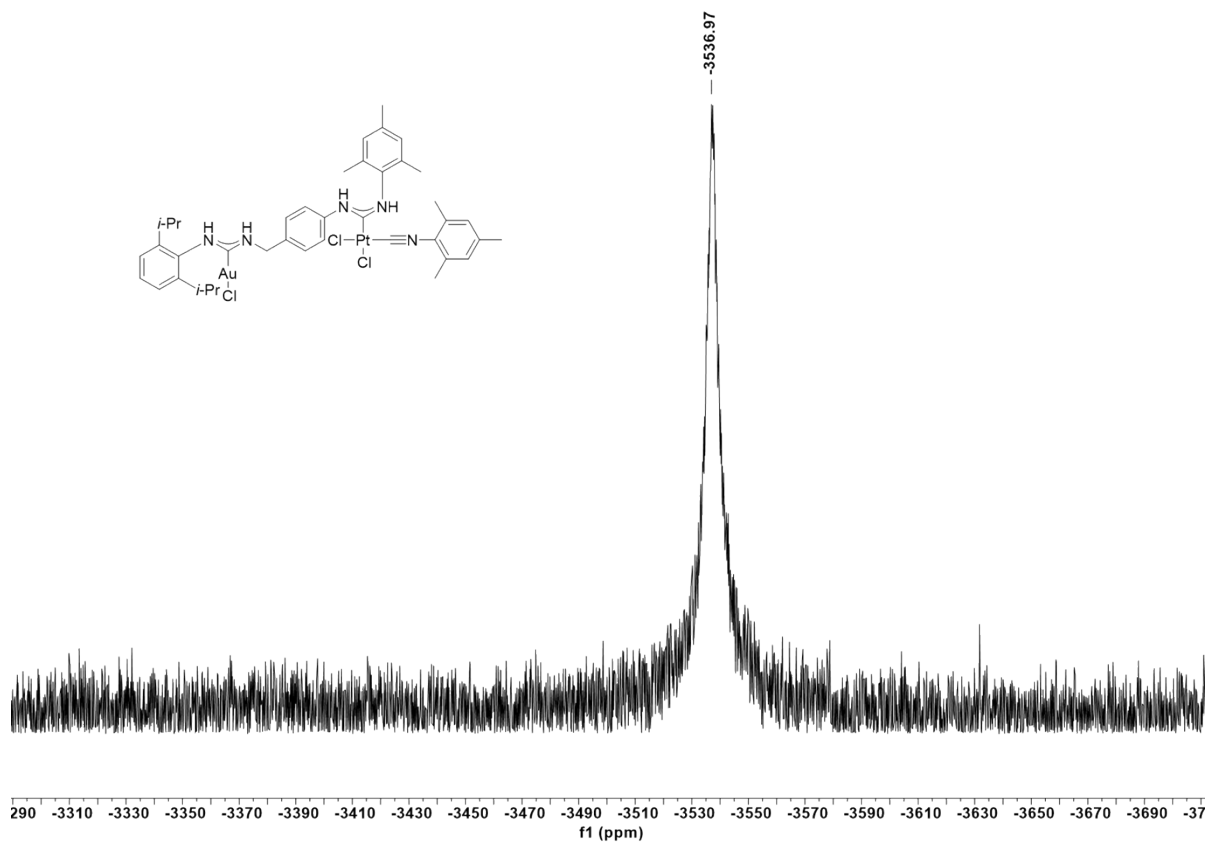

**Figure S42.** <sup>195</sup>Pt NMR of **3j** in CD<sub>2</sub>Cl<sub>2</sub> (86 MHz, 295K).

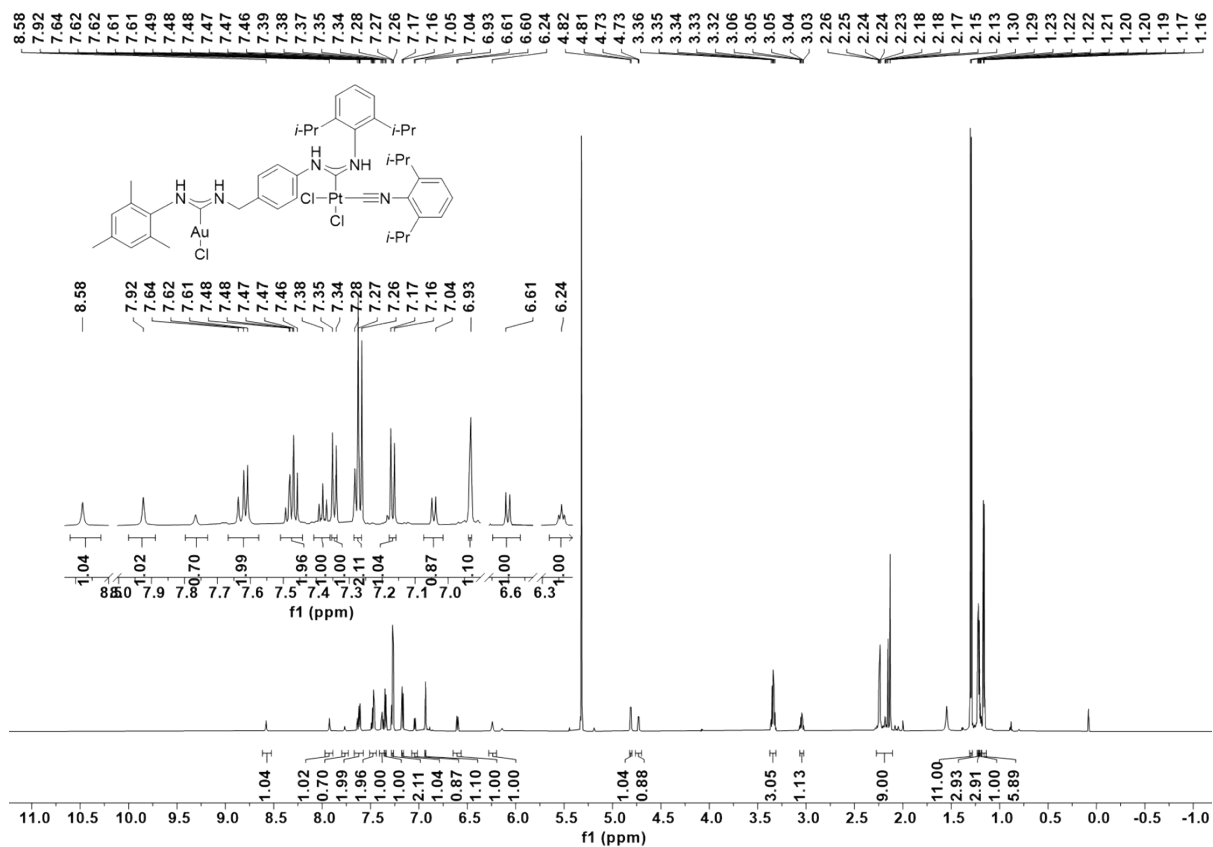

Figure S43. <sup>1</sup>H NMR of **3k** in CD<sub>2</sub>Cl<sub>2</sub> (700 MHz, 295K).

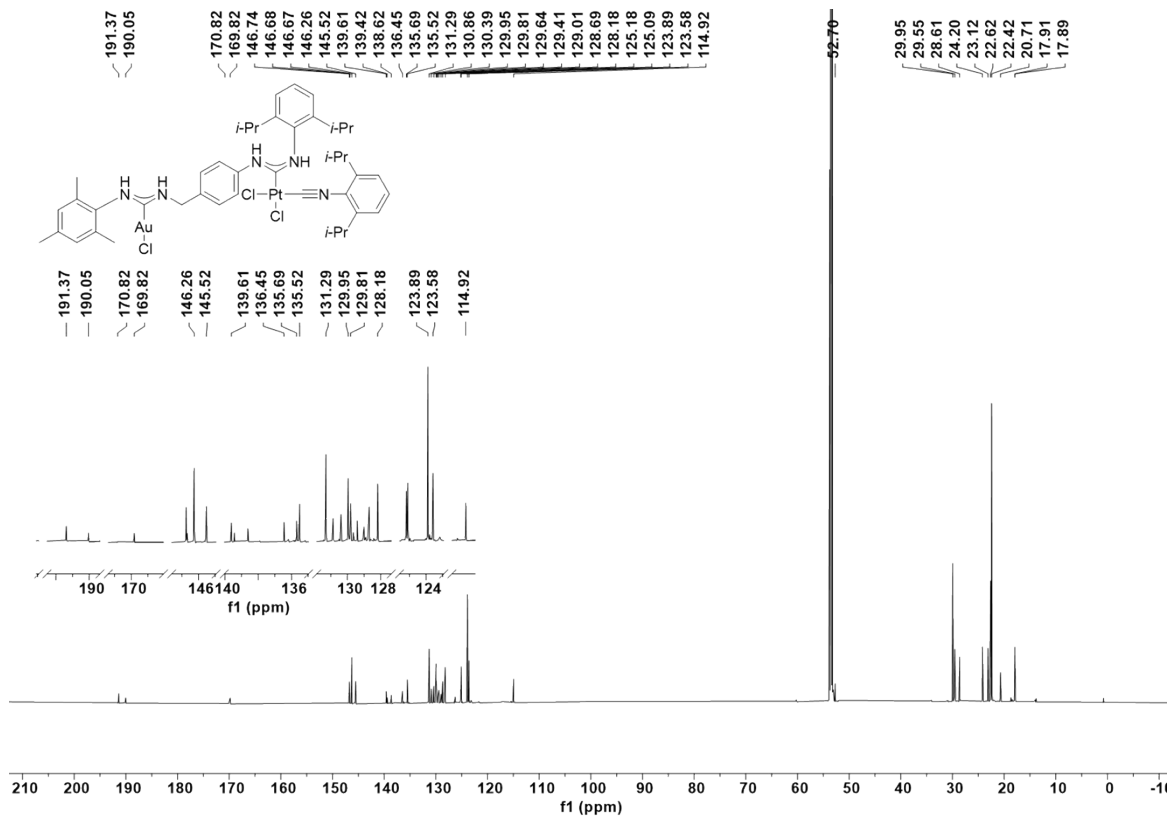

Figure S44. <sup>13</sup>C NMR of **3k** in CD<sub>2</sub>Cl<sub>2</sub> (176 MHz, 295K).

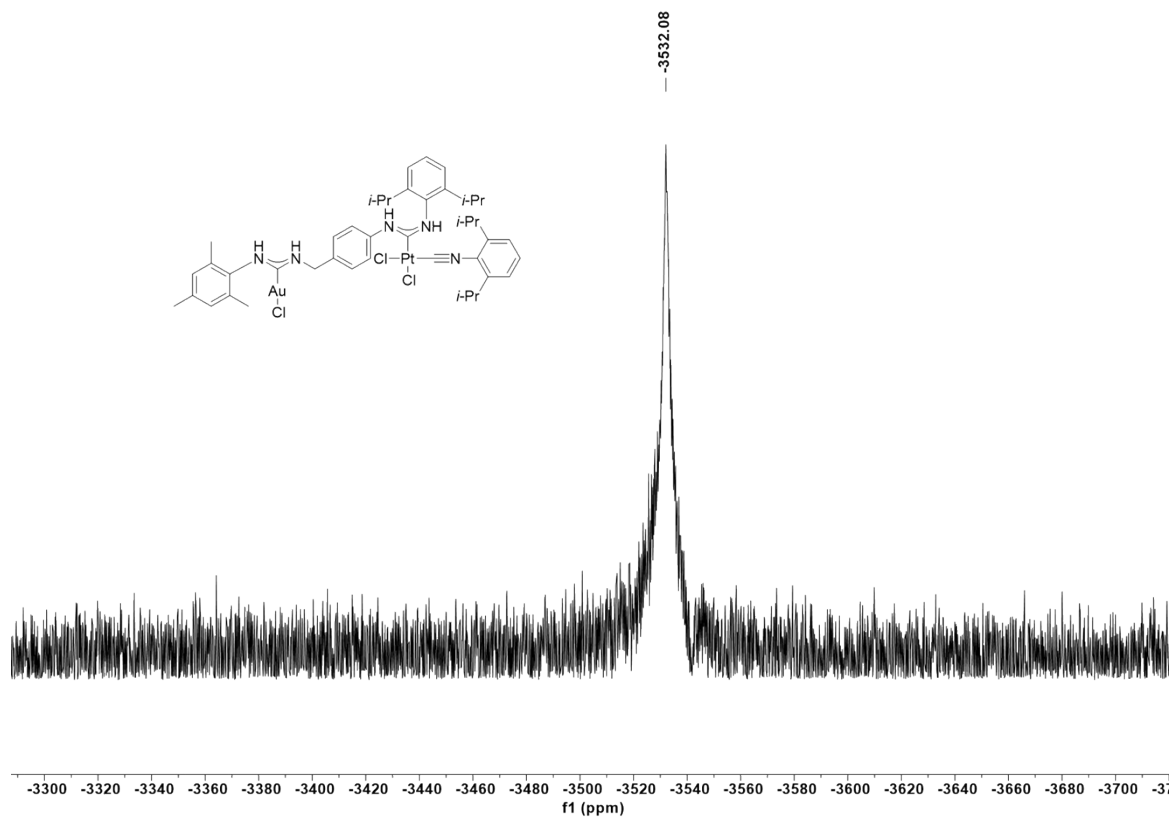

**Figure S45.**  $^{195}\text{Pt}$  NMR of **3k** in  $\text{CD}_2\text{Cl}_2$  (86 MHz, 295K).

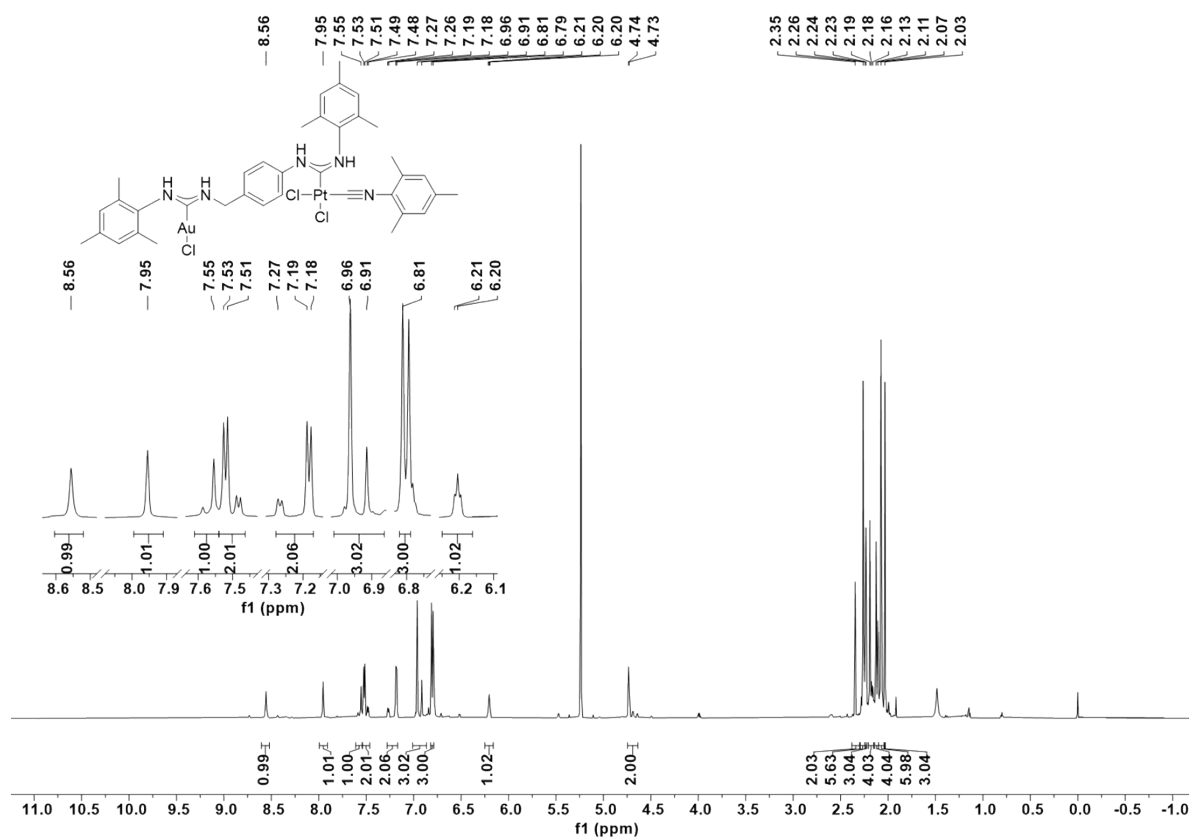

**Figure S46.**  $^1\text{H}$  NMR of **3l** in  $\text{CD}_2\text{Cl}_2$  (700 MHz, 295K).

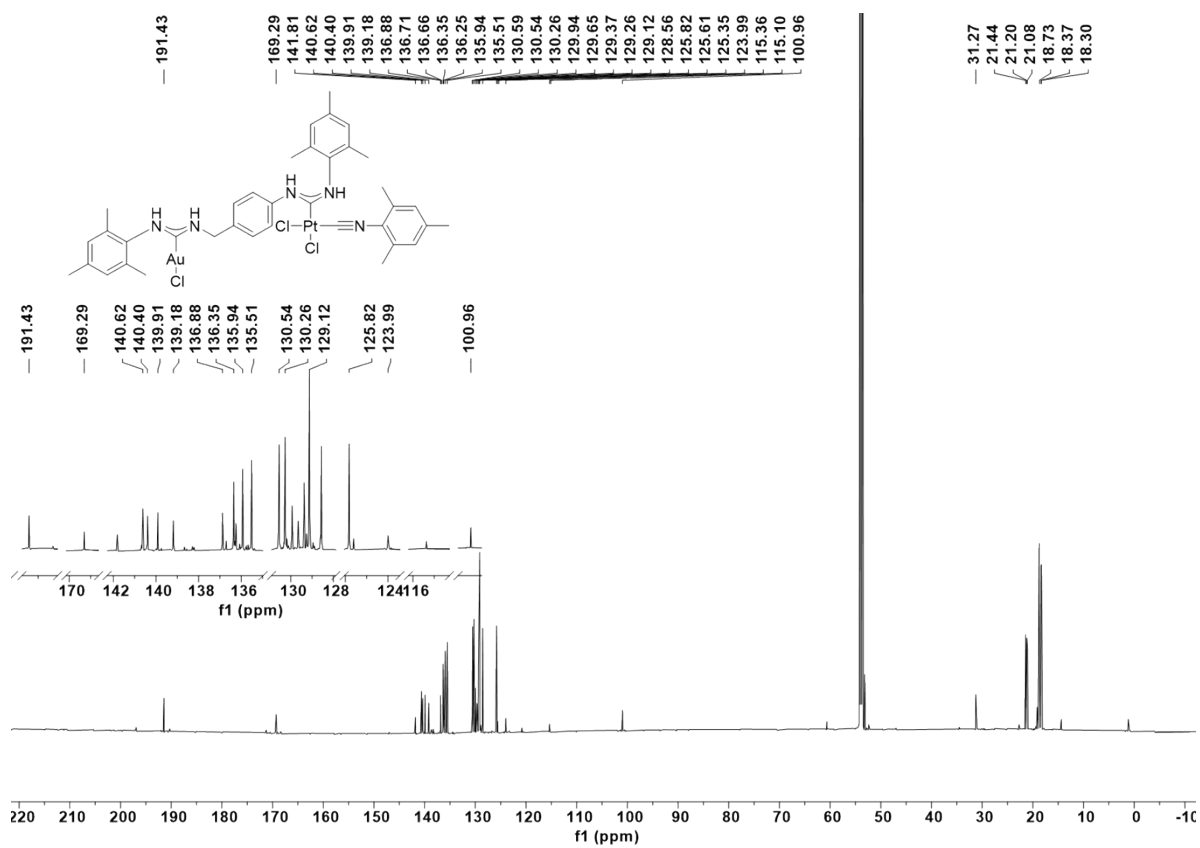

**Figure S47.** <sup>13</sup>C NMR of **31** in CD<sub>2</sub>Cl<sub>2</sub> (176 MHz, 295K).

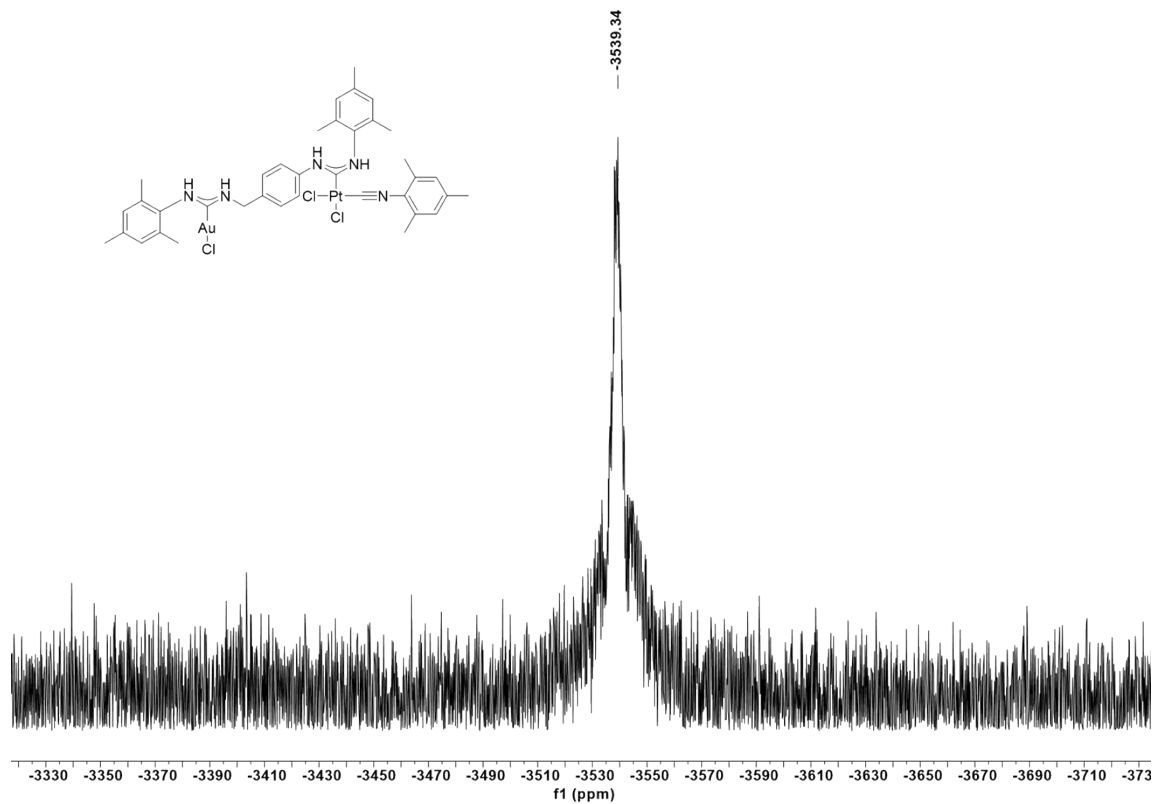

**Figure S48.** <sup>195</sup>Pt NMR of **31** in CD<sub>2</sub>Cl<sub>2</sub> (86 MHz, 295K).

## 4 DNA Docking

The docking studies with the DNA were carried using the AutoDock Vina 1.1.1 software,<sup>5</sup> using the B-DNA dodecamer crystallographic structure from the Protein Data Bank (PDB ID 1BNA), according to previous studies.<sup>2,6-9</sup> The 3D model of complex **3h** was obtained by quantum chemical calculations, and the DNA receptor was prepared using the Chimera 1.8 software.<sup>10,11</sup> Complex **3h** and cisplatin were fully optimized using a Density Functional Theory (DFT) approach as implemented in the Amsterdam Density Functional program (ADF2019.307)<sup>12,13</sup> with the BLYP functional<sup>14</sup>, combined with a TZ2P basis set and a small frozen core approximation. Scalar relativistic effect was included at the Zeroth Order Regular Approximation (ZORA) level.<sup>15</sup> The effect of dispersive interactions was taken into account in the geometry optimizations using Grimme D3 dispersion correction<sup>16,17</sup> and the Becke-Johnson<sup>18,19</sup> damping function (BLYP-D3(BJ)). The Hirshfeld atomic charges of the optimized geometry were used for the docking simulation. For the blind docking, the grid box was positioned in the center of the DNA molecule (coordinates xyz: 14.75, 20.98, and 9.23; size: 50×50×50 Å), and an exhaustiveness of 50 was used. Since AutoDock Vina does not recognize the Au and Pt atoms, they were replaced by Cu and Zn for docking simulations, however, keeping all the metal features obtained from the DFT calculations. To represent the binding mode of interaction, the conformer of the ligand with the lowest predicted binding free energy ( $\Delta G$ ) from the most populated cluster was chosen.

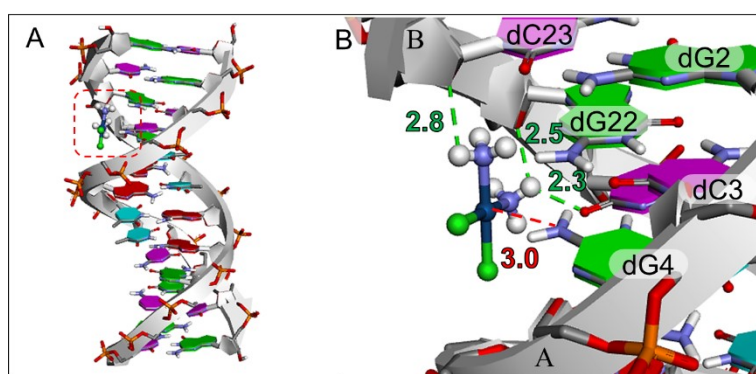

**Figure S49.** Cisplatin interaction with DNA obtained from molecular docking simulations. (A) Overview and (B) close view of the cisplatin interaction with DNA.  $\Delta G = -3.2$  kcal/mol. Hydrophobic, H-bonds, and Pt $\cdots$ N interactions are represented by purple, green, and red dashed lines with their respective distances in Å.



**Table S1.** Cartesian coordinates (Å) and energy (Hartree) of complex **3h** and cisplatin. Level of theory: ZORA-BLYP-D3(BJ)/TZ2P.

**Complex 3h**

E= -17.01051802 a.u.

|    |              |              |              |
|----|--------------|--------------|--------------|
| Au | 2.013308000  | -5.339156000 | -2.997968000 |
| Cl | 3.545542000  | -7.081034000 | -3.063236000 |
| C  | 0.703016000  | -3.791929000 | -2.960909000 |
| N  | -0.402610000 | -3.701315000 | -3.711781000 |
| N  | 0.934292000  | -2.724937000 | -2.156878000 |
| H  | -0.993814000 | -2.877779000 | -3.594941000 |
| H  | 0.340988000  | -1.898388000 | -2.239573000 |
| C  | -0.921834000 | -4.672263000 | -4.735648000 |
| C  | -1.233925000 | -6.026502000 | -4.069352000 |
| H  | -1.658341000 | -6.711741000 | -4.810934000 |
| H  | -0.324037000 | -6.477736000 | -3.662228000 |
| H  | -1.955691000 | -5.899320000 | -3.254988000 |
| C  | -2.219298000 | -4.039874000 | -5.274889000 |
| H  | -2.955510000 | -3.904164000 | -4.472891000 |
| H  | -2.662533000 | -4.693919000 | -6.031080000 |
| H  | -2.019744000 | -3.068387000 | -5.744178000 |
| C  | 0.098992000  | -4.834811000 | -5.878712000 |
| H  | 1.034794000  | -5.261762000 | -5.505686000 |
| H  | -0.308016000 | -5.506172000 | -6.642449000 |

|   |             |              |              |
|---|-------------|--------------|--------------|
| H | 0.316880000 | -3.866455000 | -6.342969000 |
| C | 1.999615000 | -2.634822000 | -1.203970000 |
| C | 2.890247000 | -1.558697000 | -1.256950000 |
| C | 3.962799000 | -1.502164000 | -0.367931000 |
| C | 4.162006000 | -2.529781000 | 0.565100000  |
| C | 3.251714000 | -3.592198000 | 0.630494000  |
| C | 2.167047000 | -3.631353000 | -0.236236000 |
| H | 2.763117000 | -0.782416000 | -2.007238000 |
| H | 4.657163000 | -0.665744000 | -0.411028000 |
| H | 1.460166000 | -4.451896000 | -0.179049000 |
| H | 3.386319000 | -4.376845000 | 1.364056000  |
| N | 5.345196000 | -2.489795000 | 1.348478000  |
| C | 5.629890000 | -3.131617000 | 2.507371000  |
| N | 6.943141000 | -3.145815000 | 2.814726000  |
| H | 6.085965000 | -1.926182000 | 0.931835000  |
| H | 7.602340000 | -2.821123000 | 2.105200000  |
| C | 7.532947000 | -3.879801000 | 3.909192000  |
| C | 8.178813000 | -5.092162000 | 3.600402000  |
| C | 8.740389000 | -5.826065000 | 4.649297000  |
| C | 8.663157000 | -5.384812000 | 5.976983000  |
| C | 8.038489000 | -4.159550000 | 6.237124000  |
| C | 7.475175000 | -3.376739000 | 5.220264000  |
| H | 8.631524000 | -6.625936000 | 2.153309000  |

|    |              |               |              |
|----|--------------|---------------|--------------|
| H  | 9.235186000  | -6.768875000  | 4.423964000  |
| H  | 9.554816000  | -5.607620000  | 7.939774000  |
| H  | 7.989327000  | -3.793334000  | 7.260844000  |
| H  | 7.165982000  | -1.690202000  | 6.517972000  |
| C  | 8.250611000  | -5.601741000  | 2.178350000  |
| H  | 7.266877000  | -5.596215000  | 1.698764000  |
| H  | 8.915307000  | -4.983406000  | 1.558124000  |
| C  | 6.829326000  | -2.051806000  | 5.541907000  |
| H  | 7.064973000  | -1.296079000  | 4.784909000  |
| H  | 5.736734000  | -2.137361000  | 5.563047000  |
| C  | 9.215078000  | -6.229129000  | 7.104411000  |
| H  | 8.441855000  | -6.906415000  | 7.493049000  |
| H  | 10.054674000 | -6.846867000  | 6.767578000  |
| Pt | 4.240725000  | -3.914713000  | 3.737884000  |
| Cl | 2.600297000  | -4.746930000  | 5.248754000  |
| C  | 4.869041000  | -5.688664000  | 3.525353000  |
| N  | 5.252214000  | -6.786179000  | 3.344142000  |
| H  | 4.598647000  | -7.396732000  | -0.468488000 |
| C  | 5.652110000  | -7.977951000  | 2.769116000  |
| C  | 6.282184000  | -8.951075000  | 3.569777000  |
| C  | 6.706753000  | -10.125176000 | 2.940944000  |
| C  | 6.510706000  | -10.345124000 | 1.569428000  |
| C  | 5.869335000  | -9.353300000  | 0.811965000  |

|    |             |               |              |
|----|-------------|---------------|--------------|
| C  | 5.426178000 | -8.158398000  | 1.384246000  |
| H  | 7.048288000 | -9.528486000  | 5.500548000  |
| H  | 7.200627000 | -10.889082000 | 3.538964000  |
| H  | 6.121095000 | -12.366541000 | 0.914399000  |
| H  | 5.705129000 | -9.510815000  | -0.252104000 |
| Cl | 3.414196000 | -1.709043000  | 3.969948000  |
| C  | 6.468508000 | -8.718035000  | 5.049260000  |
| H  | 6.981719000 | -7.768868000  | 5.237500000  |
| H  | 5.498750000 | -8.659539000  | 5.559750000  |
| C  | 6.947224000 | -11.641934000 | 0.924150000  |
| H  | 7.255730000 | -11.485678000 | -0.115286000 |
| H  | 7.780105000 | -12.099325000 | 1.468984000  |
| C  | 4.726619000 | -7.097297000  | 0.573887000  |
| H  | 3.734739000 | -6.880925000  | 0.990071000  |
| H  | 5.283110000 | -6.150819000  | 0.589313000  |

### **Cisplatin**

E= -1.78954433 a.u.

|    |              |              |              |
|----|--------------|--------------|--------------|
| Pt | -0.173672000 | -0.809134000 | 0.043548000  |
| Cl | 1.195828000  | 1.064754000  | 0.098932000  |
| Cl | 1.552541000  | -2.357694000 | 0.153123000  |
| N  | -1.712945000 | 0.644899000  | -0.055930000 |

|   |              |              |              |
|---|--------------|--------------|--------------|
| H | -1.176778000 | 1.525549000  | -0.035877000 |
| H | -2.259460000 | 0.614828000  | -0.919034000 |
| H | -2.350551000 | 0.632431000  | 0.742695000  |
| N | -1.380290000 | -2.551456000 | -0.003257000 |
| H | -2.007522000 | -2.645147000 | 0.798202000  |
| H | -1.920591000 | -2.661809000 | -0.863725000 |
| H | -0.674451000 | -3.301911000 | 0.041324000  |

## 5 Cell viability assay and cellular uptake

Five cancer cells lines (A2780, OVCAR-3, HCT116, A549, MDA-MB-231) and one non-tumoral cell type (MRC-5) were employed and grown in accordance with the supplier's instructions and maintained at 37°C in humidified atmosphere of 5% of CO<sub>2</sub>. A defined number of cells (A2780 1000 cells per well, OVCAR-3 2000 cpw, HCT116 1000 cpw, A549 1000 cpw, MDA-MB-231 1000 cpw and MRC-5 8000 cpw) was seeded in 96 well and treated after 24h with six different concentrations of the tested complexes (0.001, 0.01, 0.1, 1, 10, 100 μM). In particular, a 10 mM stock solution in DMSO was prepared for each complex. This solution was directly diluted in the culture medium, resulting in the desired six different concentrations.

After 96 h from the treatment, cell viability was measured with a CellTiter glow assay (Promega, Madison, WI, USA) with BioTek Synergy H1. IC<sub>50</sub> values were calculated from logistical dose response curves. Averages were obtained from triplicates and error bars are standard deviations.

As far as concerned the cellular uptake experiments, A549 cancer cells were seeded at 2·10<sup>6</sup> cells/plate in 10 cm dishes. After overnight culture at 37 °C and 5% CO<sub>2</sub>, cells were treated at 1 μM concentrations of compounds **3h** and **3e** for 3, 6 and 24 hours in duplicate samples. Cells were washed twice with PBS, the washing solution was removed and cells isolated by scraping. Pellets of 2·10<sup>6</sup> cells were collected and desegregated overnight in a 2:1 HNO<sub>3</sub>:H<sub>2</sub>O<sub>2</sub> mixture. After a 1:10 dilution, samples were analysed by ICP-MS iCAP RQ Thermo Scientific in STDS mode.

## 6 Stability of complex **3h** in solution

In order to assess the stability of the used complexes in solution for the antiproliferative studies, exemplarily complex **3h** was dissolved in a 100 mM saline solution in D<sub>2</sub>O and DMSO-d<sub>6</sub> in the rationand was left to stand at room temperature. <sup>1</sup>H NMR spectra of the solution were measured after t = 0 h, 3 h, 6 h, 12 h, 24 h and 48 h. No decomposition was observed.

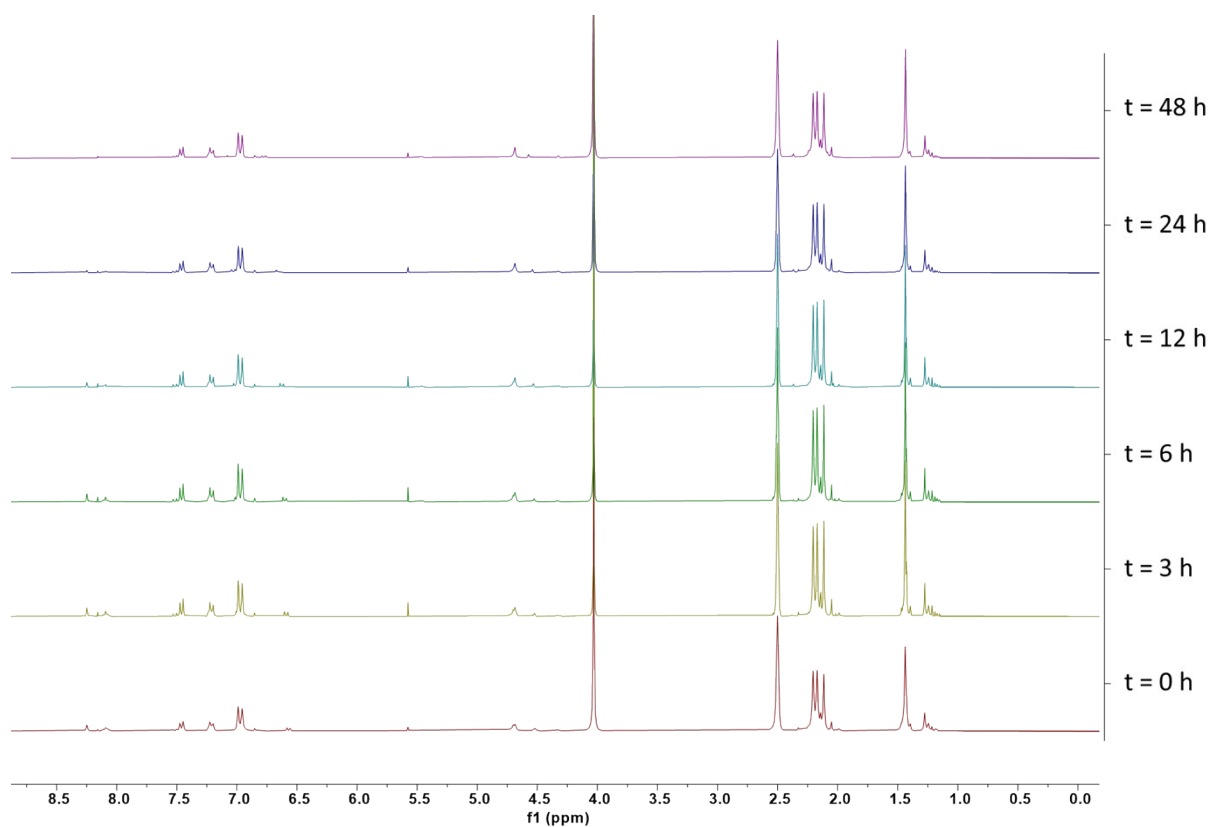

**Figure S50.** Stability studies of complex **3h** via <sup>1</sup>H NMR experiments in a 100 mM saline solution in D<sub>2</sub>O and DMSO-d<sub>6</sub> at 300 MHz and 295 K.

## 7 Single Crystal Structure of 3c

|                                      |                                                                                                                                |
|--------------------------------------|--------------------------------------------------------------------------------------------------------------------------------|
| Empirical formula                    | $C_{46.70}H_{61.91}Au_{0.73}Cl_{3.43}N_5O_{0.54}Pt$                                                                            |
| Formula weight                       | 1162.23                                                                                                                        |
| Temperature                          | 200(2) K                                                                                                                       |
| Wavelength                           | 1.54178 Å                                                                                                                      |
| Crystal system                       | monoclinic                                                                                                                     |
| Space group                          | $P2_1/n$                                                                                                                       |
| Z                                    | 8                                                                                                                              |
| Unit cell dimensions                 | $a = 19.7827(5)$ Å $\alpha = 90$ deg.<br>$b = 24.1706(7)$ Å $\beta = 103.752(2)$ deg.<br>$c = 21.6782(6)$ Å $\gamma = 90$ deg. |
| Volume                               | $10068.5(5)$ Å <sup>3</sup>                                                                                                    |
| Density (calculated)                 | 1.53 g/cm <sup>3</sup>                                                                                                         |
| Absorption coefficient               | 11.03 mm <sup>-1</sup>                                                                                                         |
| Crystal shape                        | needle                                                                                                                         |
| Crystal size                         | 0.390 x 0.018 x 0.018 mm <sup>3</sup>                                                                                          |
| Crystal colour                       | colourless                                                                                                                     |
| Theta range for data collection      | 2.7 to 62.0 deg.                                                                                                               |
| Index ranges                         | $-20 \leq h \leq 22$ , $-27 \leq k \leq 24$ , $-20 \leq l \leq 24$                                                             |
| Reflections collected                | 52287                                                                                                                          |
| Independent reflections              | 15181 ( $R(\text{int}) = 0.0550$ )                                                                                             |
| Observed reflections                 | 10268 ( $I > 2\sigma(I)$ )                                                                                                     |
| Absorption correction                | Semi-empirical from equivalents                                                                                                |
| Max. and min. transmission           | 0.71 and 0.24                                                                                                                  |
| Refinement method                    | Full-matrix least-squares on $F^2$                                                                                             |
| Data/restraints/parameters           | 15181 / 967 / 1124                                                                                                             |
| Goodness-of-fit on $F^2$             | 1.01                                                                                                                           |
| Final R indices ( $I > 2\sigma(I)$ ) | $R1 = 0.050$ , $wR2 = 0.095$                                                                                                   |
| Largest diff. peak and hole          | 0.83 and $-1.18$ eÅ <sup>-3</sup>                                                                                              |

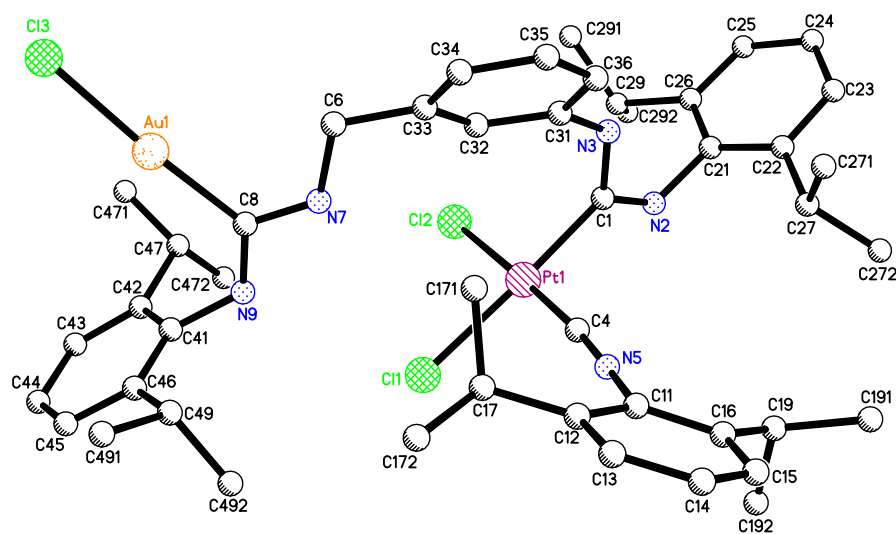



## 8 References

1. M. C. Dietl, V. Vethacke, A. Keshavarzi, F. F. Mulks, F. Rominger, M. Rudolph, I. A. I. Mkhaliid and A. S. K. Hashmi, *Organometallics*, 2022, **41**, 802–810.
2. I. M. Sluch, A. J. Miranda, O. Elbjeirami, M. A. Omary and L. M. Slaughter, *Inorg. Chem.*, 2012, **51**, 10728–10746.
3. T. B. Peters, J. C. Bohling, A. M. Arif and J. A. Gladysz, *Organometallics*, 1999, **18**, 3261–3263.
4. M. Sankarganesh, J. Dhavethu Raja, K. Sakthikumar, R. V. Solomon, J. Rajesh, S. Athimoolam and V. Vijayakumar, *Bioorg Chem*, 2018, **81**, 144–156.
5. O. Trott and A. J. Olson, *J Comput Chem*, 2010, **31**, 455–461.
6. A. Zianna, G. Geromichalos, A. M. Fiotaki, A. G. Hatzidimitriou, S. Kalogiannis and G. Psomas, *Pharmaceuticals*, 2022, **15**, 886.
7. N. Shahabadi, L. Ghaffari, Z. Mardani and F. Shiri, *Biol Trace Elem Res*, 2022, **200**, 1988–2000.
8. R. A. Hussain, A. Badshah, M. Sohail, B. Lal and K. Akbar, *J Mol Struct*, 2013, **1048**, 367–374.
9. T. Zimmermann, M. Zeizinger and J. V. Burda, *J Inorg Biochem*, 2005, **99**, 2184–2196.
10. E. F. Pettersen, T. D. Goddard, C. C. Huang, G. S. Couch, D. M. Greenblatt, E. C. Meng and T. E. Ferrin, *J Comput Chem*, 2004, **25**, 1605–1612.
11. P. A. Nogara, F. Bright, O. Gustavo, R. Bolzan, C. Pereira, L. Orian, J. Batista and T. Rocha, *J Mol Model*, 2022, **28**, 354.
12. E. J. Baerends, ADF2019, SCM, Theoretical Chemistry, Vrije Universiteit, Amsterdam, The Netherlands, 2019.
13. G. te Velde, F. M. Bickelhaupt, E. J. Baerends, C. Fonseca Guerra, S. J. A. van Gisbergen, J. G. Snijders and T. Ziegler, *J Comput Chem*, 2001, **22**, 931–967.
14. C. Lee, W. Yang and R. G. Parr, *Phys Rev B*, 1988, **37**, 785–789.
15. E. van Lenthe, E. J. Baerends and J. G. Snijders, *J Chem Phys*, 1994, **101**, 9783.
16. S. Grimme, Wiley Interdisciplinary Reviews: Computational Molecular Science, 2011, **1**, 211–228.
17. S. Grimme, J. Antony, S. Ehrlich and H. Krieg, *J Chem Phys*, 2010, **132**, 154104.
18. E. R. Johnson, I. D. Mackie and G. A. DiLabio, *J Phys Org Chem*, 2009, **22**, 1127–1135.
19. A. D. Becke and E. R. Johnson, *J Chem Phys*, 2005, **123**, 154101.
